# Supplementary material
Source: MDPI journal article supplement (https://www.mdpi.com/1424-8247/15/8/949)
Supplement: s1 [file s1]

## Supplementary data

for

### **Design, synthesis, and development of pyrazolo[1,5-*a*]pyrimidine derivatives as a novel series of selective PI3K $\delta$ inhibitors. Part I – Indole derivatives.**

Mariola Stypik<sup>1,2\*</sup>, Marcin Zagozda<sup>1</sup>, Stanisław Michałek<sup>1,2</sup>, Barbara Dymek<sup>1</sup>, Daria Zdżalik-Bielecka<sup>1</sup>, Maciej Dziachan<sup>1</sup>, Nina Orłowska<sup>1,2</sup>, Paweł Gunerka<sup>1</sup>, Paweł Turowski<sup>1</sup>, Joanna Hucz-Kalitowska<sup>1</sup>, Aleksandra Stańczak<sup>1</sup>, Paulina Stańczak<sup>1</sup>, Krzysztof Mulewski<sup>1</sup>, Damian Smuga<sup>1</sup>, Filip Stefaniak<sup>1</sup>, Lidia Gurba-Bryśkiewicz<sup>1</sup>, Arkadiusz Leniak<sup>1</sup>, Zbigniew Ochal<sup>2</sup>, Mateusz Mach<sup>1</sup>, Karolina Dzwonek<sup>1</sup>, Monika Lamparska-Przybysz<sup>1</sup>, Krzysztof Dubiel<sup>1</sup>, Maciej Wieczorek<sup>1</sup>

<sup>1</sup> Celon Pharma S.A. ul. Marymoncka 15, 05-152 Kązuoł Nowy, Poland

<sup>2</sup> Faculty of Chemistry, Warsaw University of Technology, ul. Noakowskiego 3, 00-664 Warsaw, Poland

\*corresponding author: mariola.stypik@celonpharma.com

<sup>1</sup>H NMR, <sup>13</sup>C NMR and HRMS supplementary figures of the final compounds **5-13**, **23-45**, **49-51** and **53-55**

## INDEX

|                                                      |    |
|------------------------------------------------------|----|
| Compound 5 $^1\text{H}$ NMR                          | 4  |
| Compound 6 $^1\text{H}$ NMR                          | 4  |
| Compound 7 $^1\text{H}$ NMR                          | 5  |
| Compound 9 $^1\text{H}$ NMR                          | 5  |
| Compound 10 $^1\text{H}$ NMR                         | 6  |
| Compound 11 $^1\text{H}$ NMR                         | 6  |
| Compound 12 $^1\text{H}$ NMR                         | 7  |
| Compound 13 $^1\text{H}$ NMR                         | 7  |
| Compound 23 $^1\text{H}$ NMR and $^{13}\text{C}$ NMR | 8  |
| Compound 23 HRMS                                     | 9  |
| Compound 24 $^1\text{H}$ NMR                         | 10 |
| Compound 24 HRMS                                     | 11 |
| Compound 25 $^1\text{H}$ NMR and $^{13}\text{C}$ NMR | 12 |
| Compound 25 HRMS                                     | 13 |
| Compound 26 $^1\text{H}$ NMR and $^{13}\text{C}$ NMR | 14 |
| Compound 26 HRMS                                     | 15 |
| Compound 27 $^1\text{H}$ NMR and $^{13}\text{C}$ NMR | 16 |
| Compound 27 HRMS                                     | 17 |
| Compound 28 $^1\text{H}$ NMR and $^{13}\text{C}$ NMR | 18 |
| Compound 28 HRMS                                     | 19 |
| Compound 29 $^1\text{H}$ NMR and $^{13}\text{C}$ NMR | 20 |
| Compound 29 HRMS                                     | 21 |
| Compound 30 $^1\text{H}$ NMR and $^{13}\text{C}$ NMR | 22 |
| Compound 30 HRMS                                     | 23 |
| Compound 31 $^1\text{H}$ NMR and $^{13}\text{C}$ NMR | 24 |
| Compound 31 HRMS                                     | 25 |
| Compound 32 $^1\text{H}$ NMR and $^{13}\text{C}$ NMR | 26 |
| Compound 32 HRMS                                     | 27 |
| Compound 33 $^1\text{H}$ NMR and $^{13}\text{C}$ NMR | 28 |
| Compound 33 HRMS                                     | 29 |
| Compound 34 $^1\text{H}$ NMR and $^{13}\text{C}$ NMR | 30 |
| Compound 34 HRMS                                     | 31 |
| Compound 35 $^1\text{H}$ NMR and $^{13}\text{C}$ NMR | 32 |
| Compound 35 HRMS                                     | 33 |
| Compound 36 $^1\text{H}$ NMR and $^{13}\text{C}$ NMR | 34 |

|                                                      |    |
|------------------------------------------------------|----|
| Compound 36 HRMS                                     | 35 |
| Compound 37 $^1\text{H}$ NMR and $^{13}\text{C}$ NMR | 36 |
| Compound 37 HRMS                                     | 37 |
| Compound 38 $^1\text{H}$ NMR and $^{13}\text{C}$ NMR | 38 |
| Compound 38 HRMS                                     | 39 |
| Compound 39 $^1\text{H}$ NMR and $^{13}\text{C}$ NMR | 40 |
| Compound 39 HRMS                                     | 41 |
| Compound 40 $^1\text{H}$ NMR and $^{13}\text{C}$ NMR | 42 |
| Compound 40 HRMS                                     | 43 |
| Compound 41 $^1\text{H}$ NMR and $^{13}\text{C}$ NMR | 44 |
| Compound 41 HRMS                                     | 45 |
| Compound 42 $^1\text{H}$ NMR and $^{13}\text{C}$ NMR | 46 |
| Compound 42 HRMS                                     | 47 |
| Compound 43 $^1\text{H}$ NMR and $^{13}\text{C}$ NMR | 48 |
| Compound 43 HRMS                                     | 49 |
| Compound 44 $^1\text{H}$ NMR and $^{13}\text{C}$ NMR | 50 |
| Compound 44 HRMS                                     | 51 |
| Compound 49 $^1\text{H}$ NMR and $^{13}\text{C}$ NMR | 52 |
| Compound 49 HRMS                                     | 53 |
| Compound 50 $^1\text{H}$ NMR and $^{13}\text{C}$ NMR | 54 |
| Compound 50 HRMS                                     | 55 |
| Compound 51 $^1\text{H}$ NMR and $^{13}\text{C}$ NMR | 56 |
| Compound 51 HRMS                                     | 57 |
| Compound 53 $^1\text{H}$ NMR and $^{13}\text{C}$ NMR | 58 |
| Compound 53 HRMS                                     | 59 |
| Compound 54 $^1\text{H}$ NMR and $^{13}\text{C}$ NMR | 60 |
| Compound 54 HRMS                                     | 61 |
| Compound 55 $^1\text{H}$ NMR and $^{13}\text{C}$ NMR | 62 |
| Compound 55 HRMS                                     | 63 |

## Compound 5

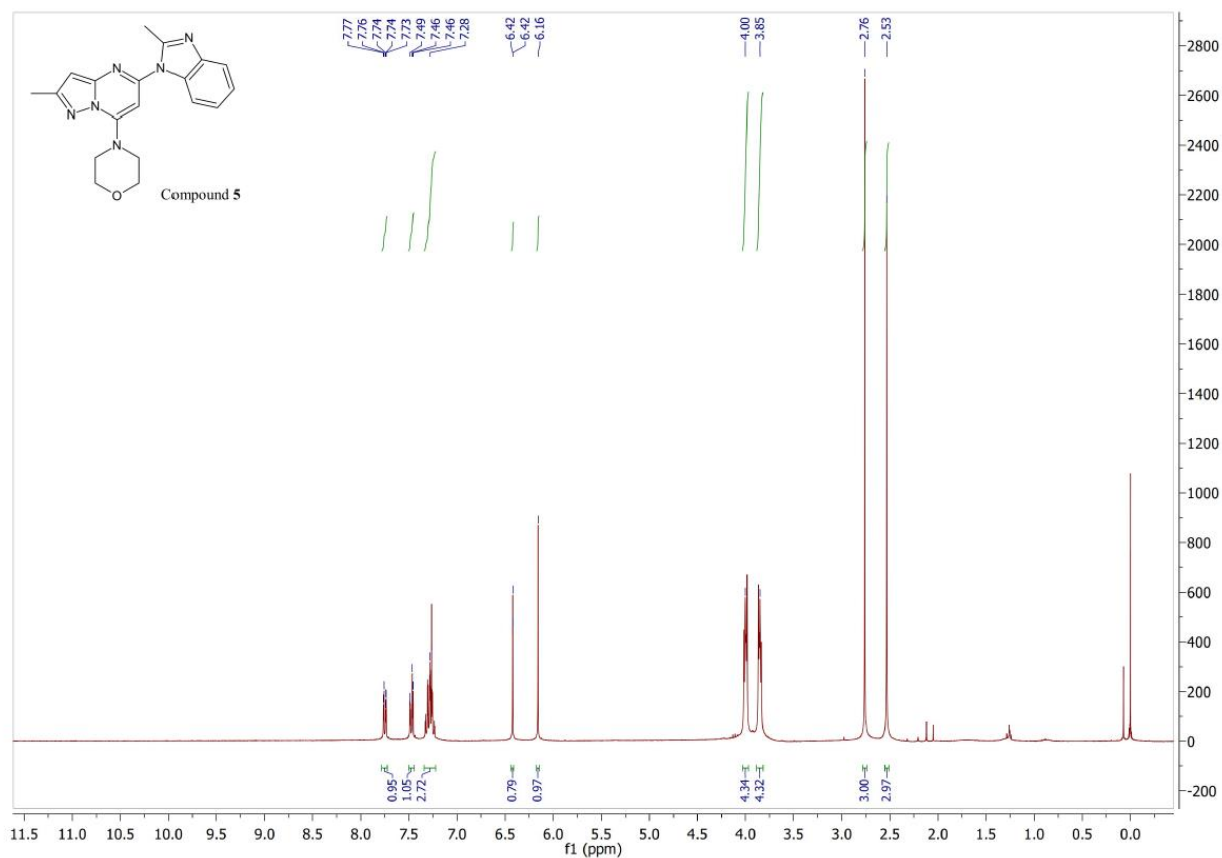

## Compound 6

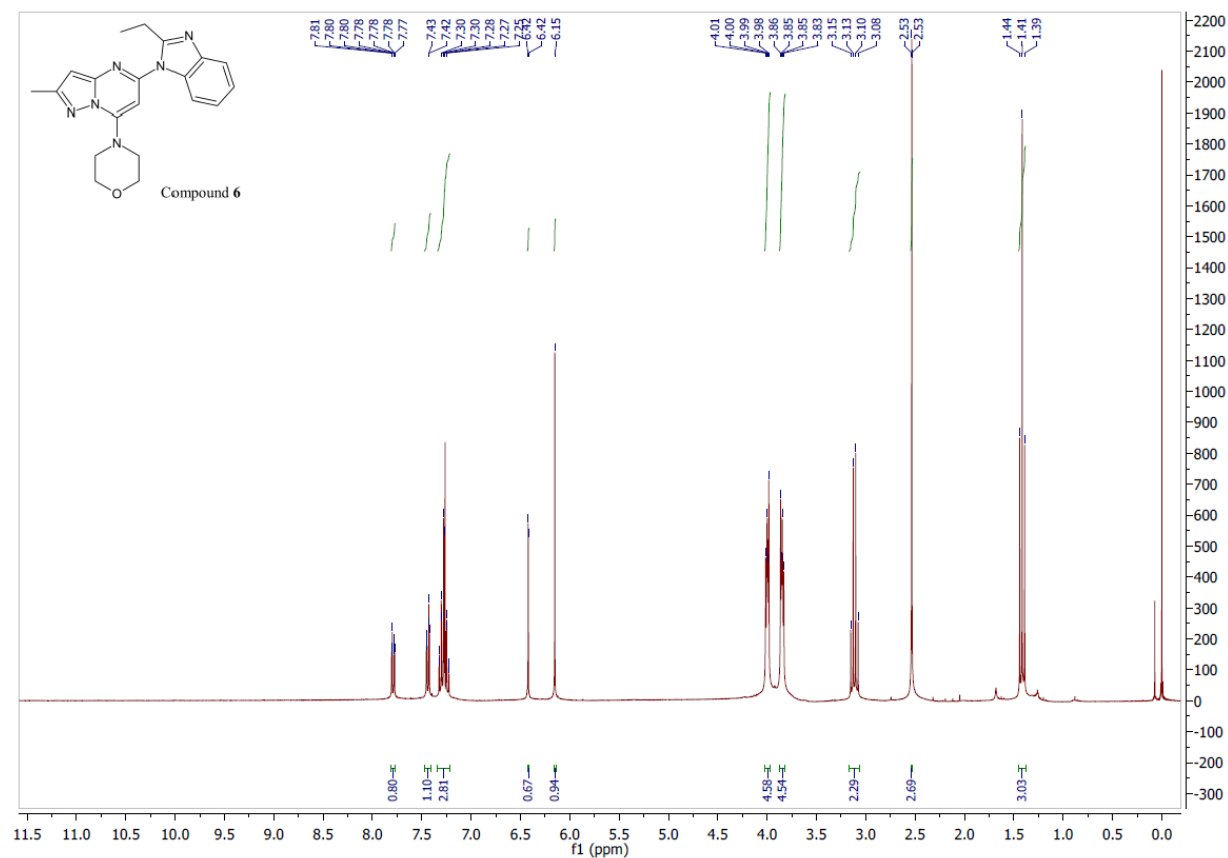



## Compound 7

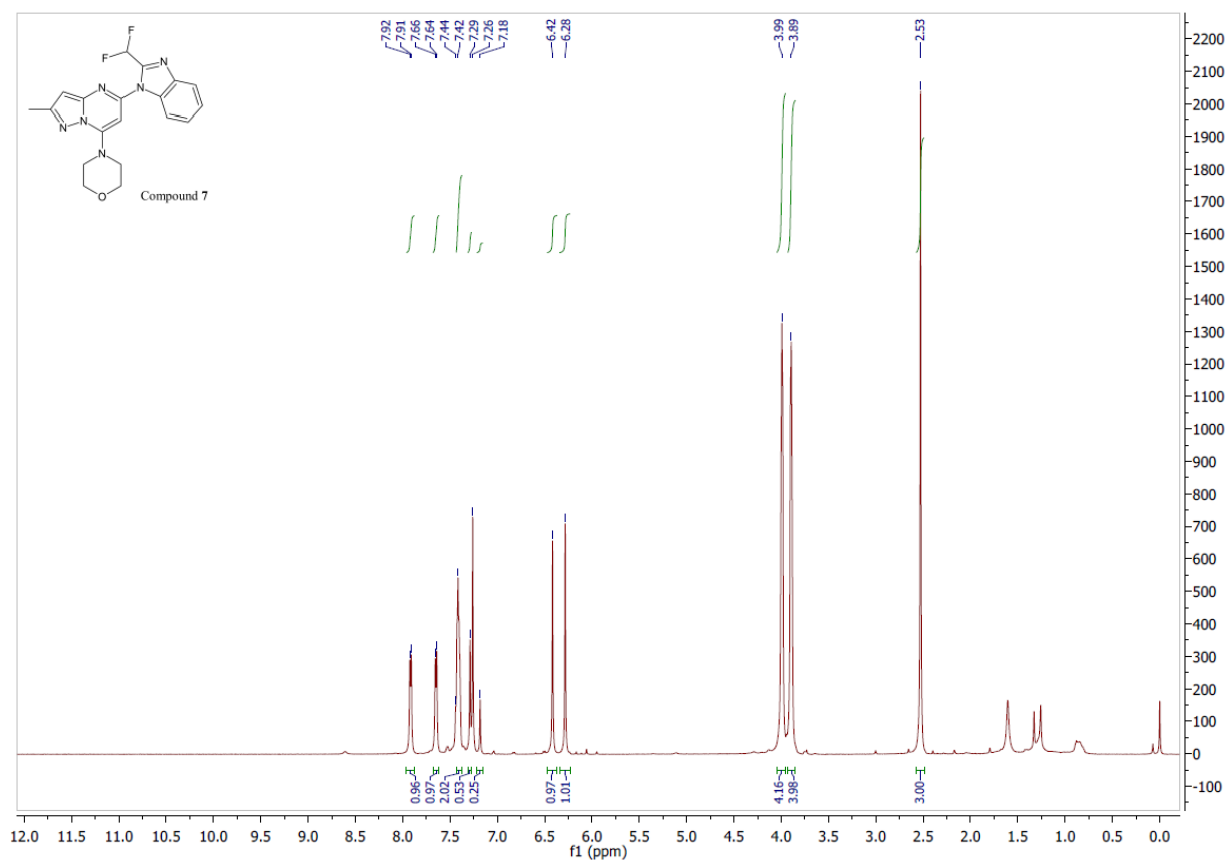

## Compound 9

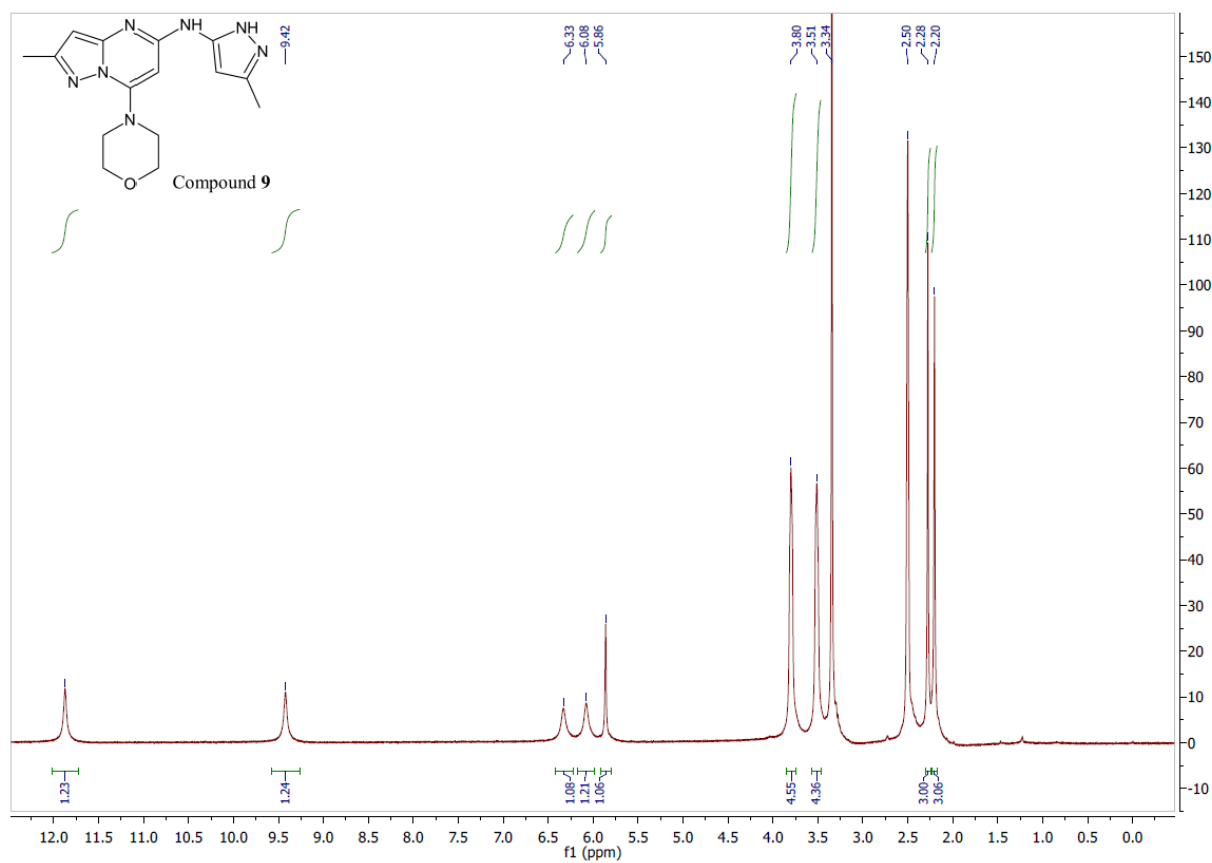

## Compound 10

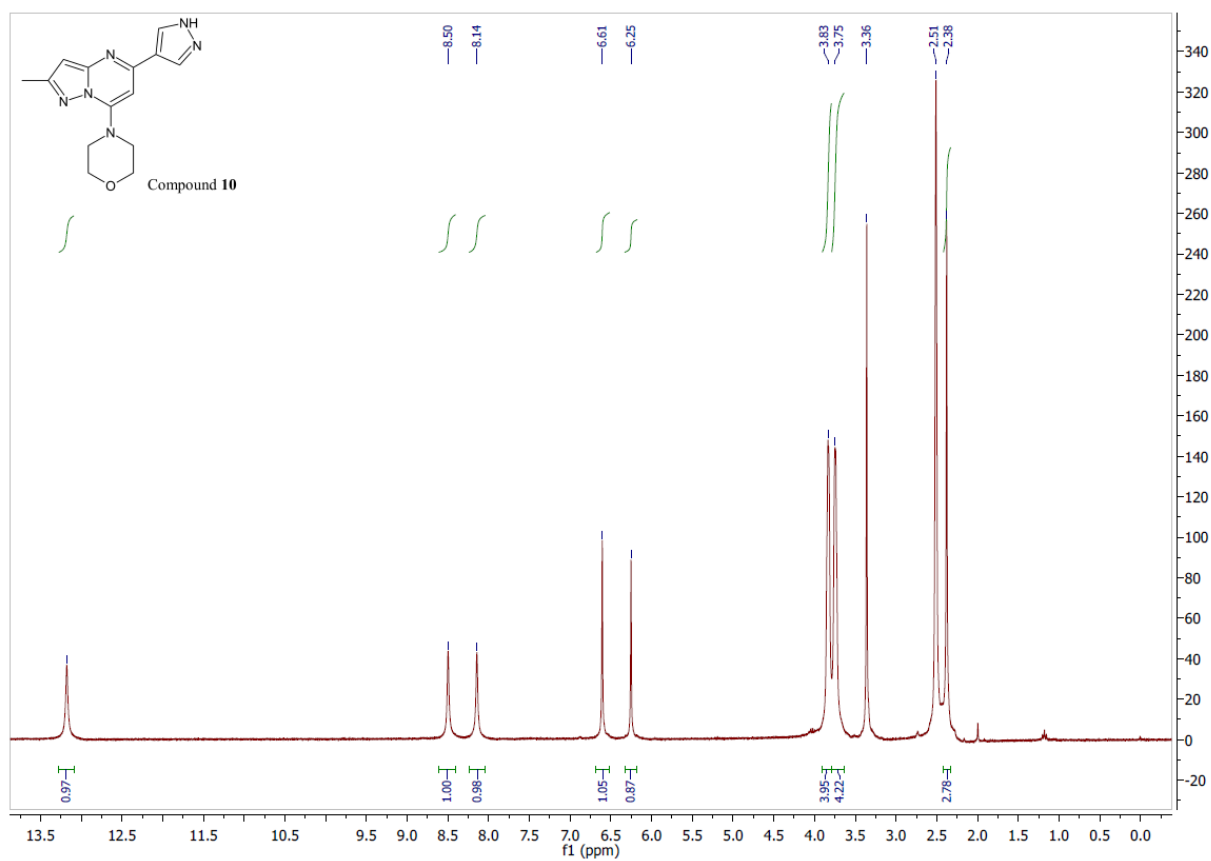

## Compound 11

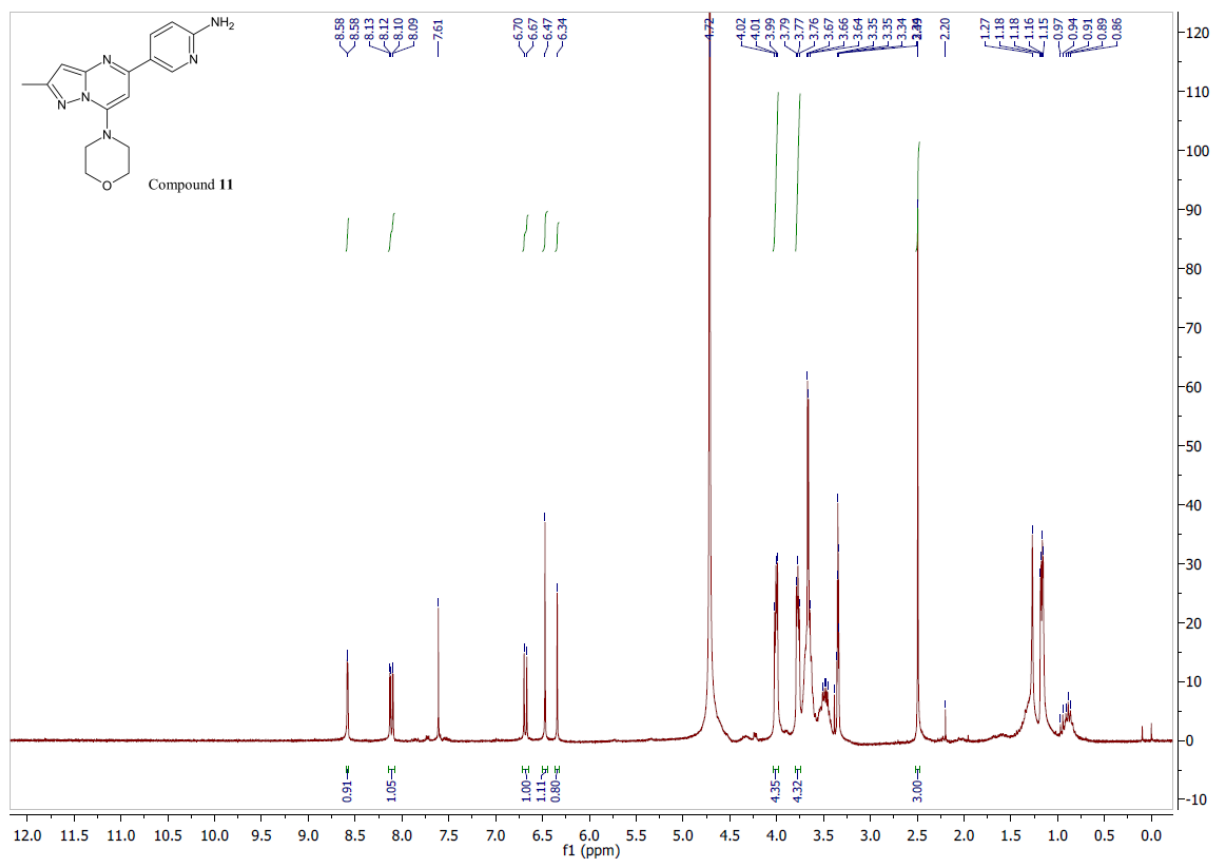

## Compound 12

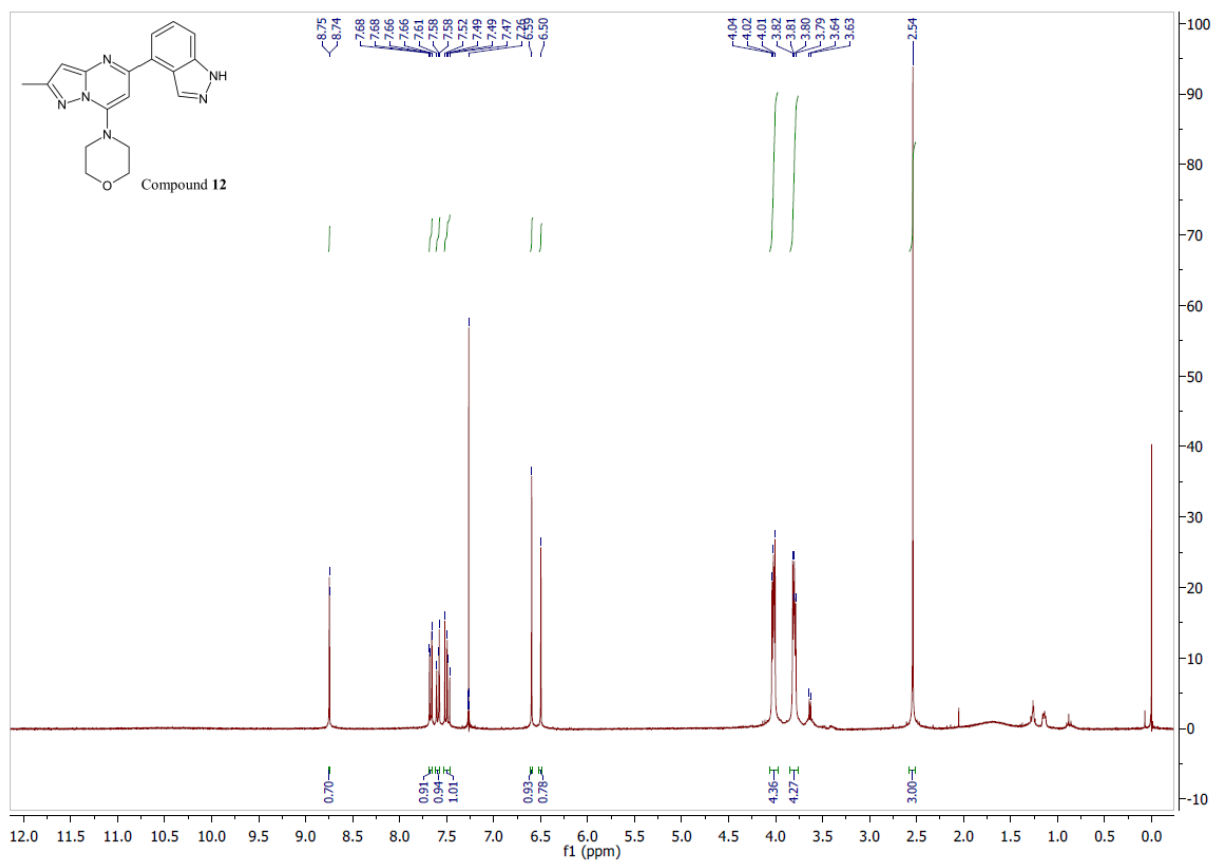

## Compound 13

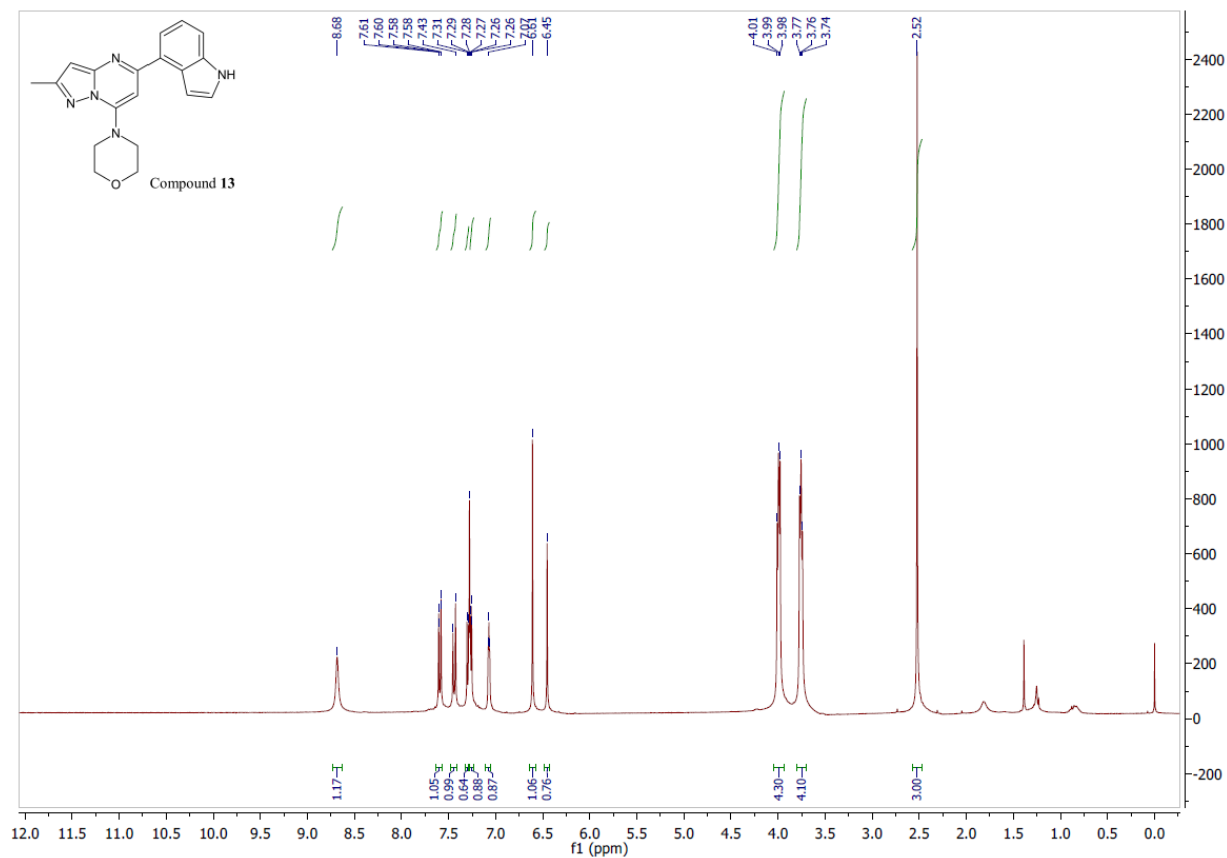

# Compound 23

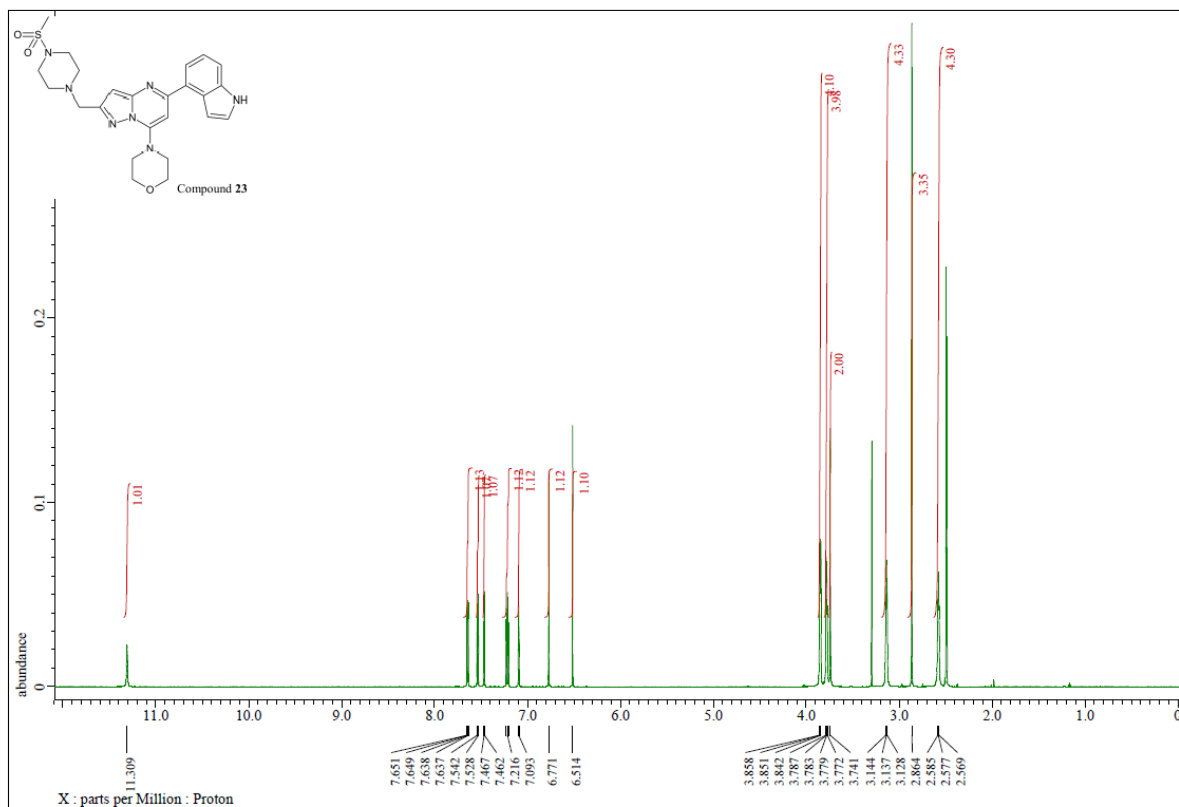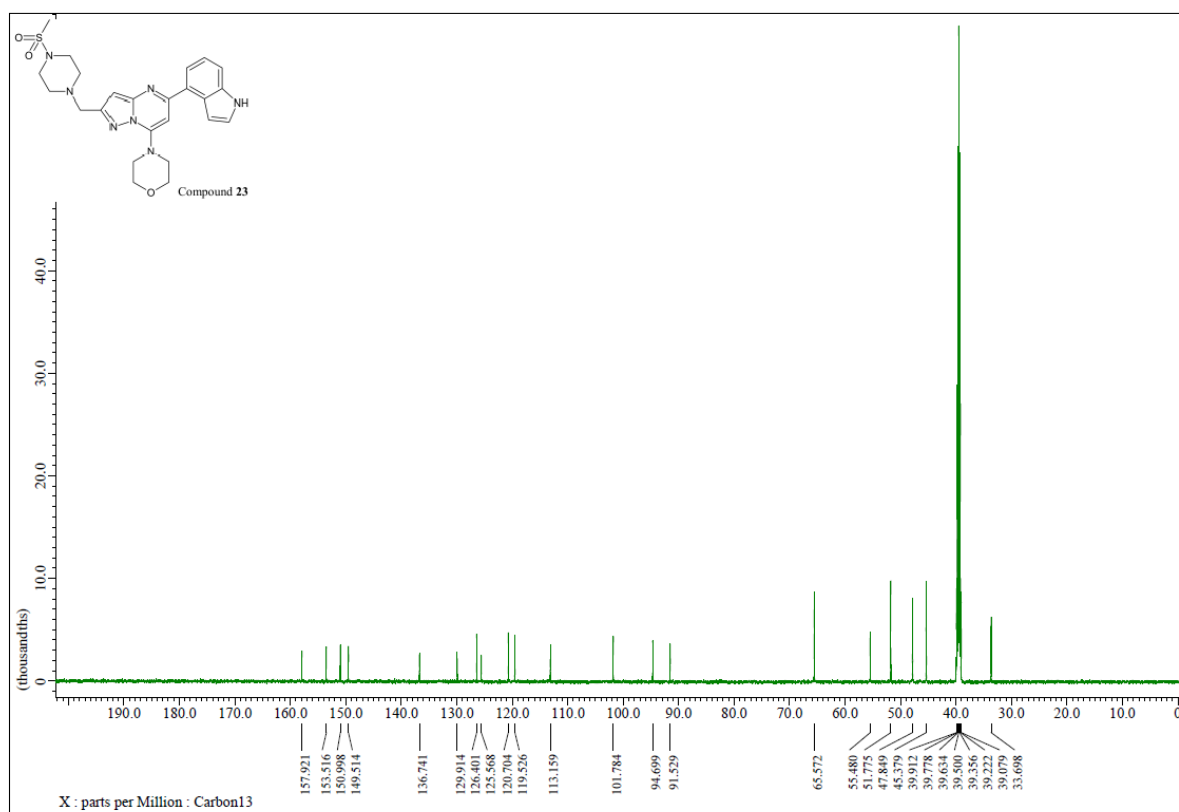

## Compound 23

| Name        | Obs. m/z  | Obs. RT | Obs. Mass | Tgt Formula     | Tgt Mass  | Tgt Mass Error | Find Cpbs Alaoirit |
|-------------|-----------|---------|-----------|-----------------|-----------|----------------|--------------------|
| Compound 23 | 248.61037 | 1.2     | 495.2061  | C24 H29 N7 O3 S | 495.20526 | 1.69           | Find by Formula    |

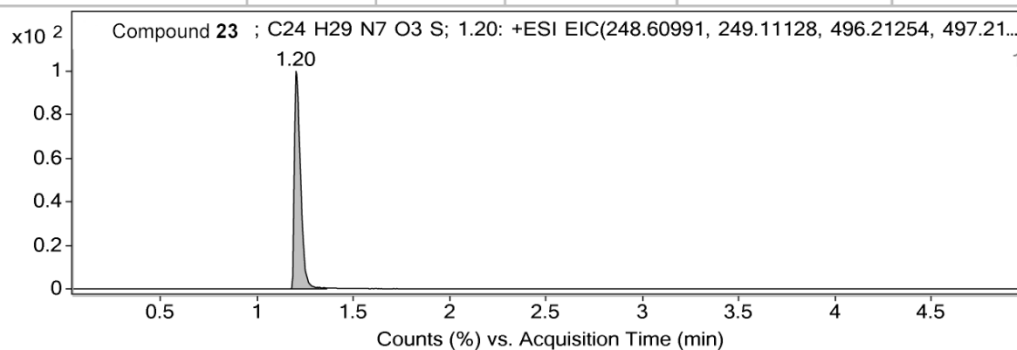

MS Zoomed Spectrum

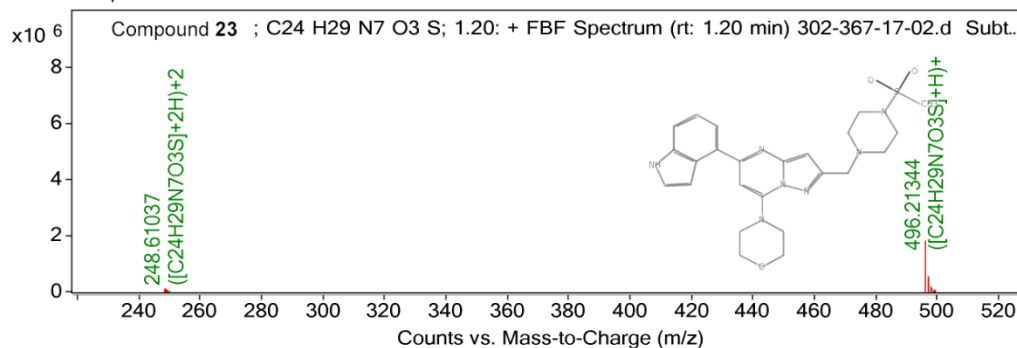

MS Zoomed Spectrum

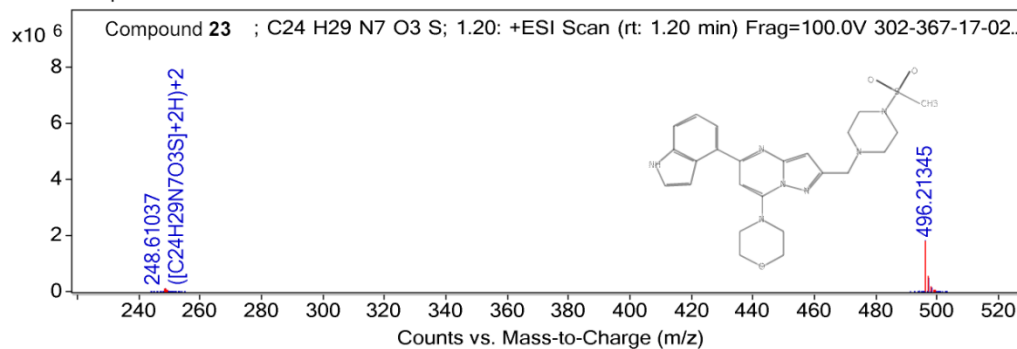

MS Spectrum Peak List

| Obs. m/z  | Charge | Abund      | Formula     | Ion/Isotope | Tgt Mass Error (ppm) |
|-----------|--------|------------|-------------|-------------|----------------------|
| 248.61037 | 2      | 102185.98  | C24H29N7O3S | (M+2H)+2    |                      |
| 249.11171 | 2      | 27759.85   | C24H29N7O3S | (M+2H)+2    |                      |
| 249.6106  | 2      | 9742.93    | C24H29N7O3S | (M+2H)+2    |                      |
| 250.11214 | 2      | 2644.55    | C24H29N7O3S | (M+2H)+2    |                      |
| 496.21344 | 1      | 1807565    | C24H29N7O3S | (M+H)+      |                      |
| 497.2157  | 1      | 473910.06  | C24H29N7O3S | (M+H)+      |                      |
| 498.21467 | 1      | 127993.41  | C24H29N7O3S | (M+H)+      |                      |
| 499.21422 | 1      | 21856.06   | C24H29N7O3S | (M+H)+      |                      |
| 248.61037 | 2      | 102185.98  | C24H29N7O3S | (M+2H)+2    | 1.85                 |
| 249.11171 | 2      | 27759.85   | C24H29N7O3S | (M+2H)+2    | 1.72                 |
| 249.6106  | 2      | 9742.93    | C24H29N7O3S | (M+2H)+2    | 1.25                 |
| 250.11214 | 2      | 2644.55    | C24H29N7O3S | (M+2H)+2    | 5.99                 |
| 496.21344 | 1      | 1807565    | C24H29N7O3S | (M+H)+      | 1.83                 |
| 496.21345 |        | 1811059.88 |             |             |                      |
| 497.2157  | 1      | 473910.06  | C24H29N7O3S | (M+H)+      | 0.84                 |
| 498.21467 | 1      | 127993.41  | C24H29N7O3S | (M+H)+      | 2.74                 |
| 499.21422 | 1      | 21856.06   | C24H29N7O3S | (M+H)+      | 0.44                 |

# Compound 24

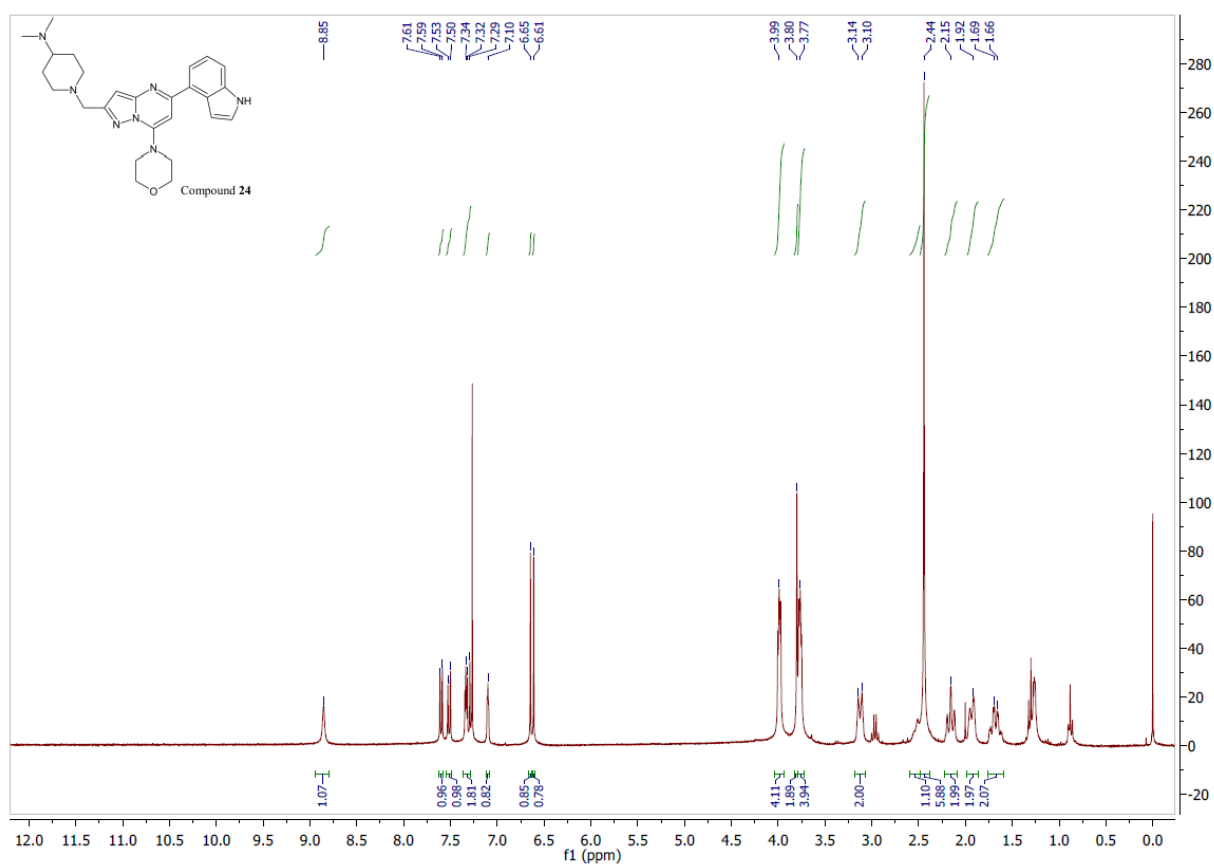

## Compound 24

| Name        | Obs. m/z | Obs. RT | Obs. Mass | Tgt Formula  | Tgt Mass | Tgt Mass Error | Find Cpds Algorith |
|-------------|----------|---------|-----------|--------------|----------|----------------|--------------------|
| Compound 24 | 460.2842 | 1.02    | 459.2768  | C26 H33 N7 O | 459.2747 | 4.76           | Find by Formula    |

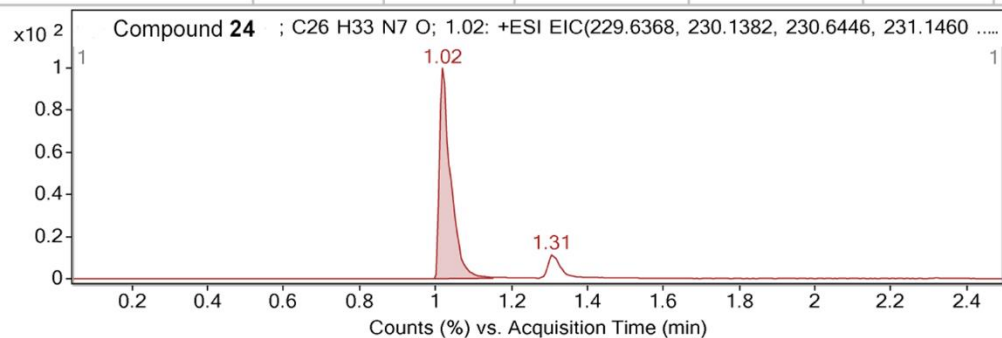

MS Zoomed Spectrum

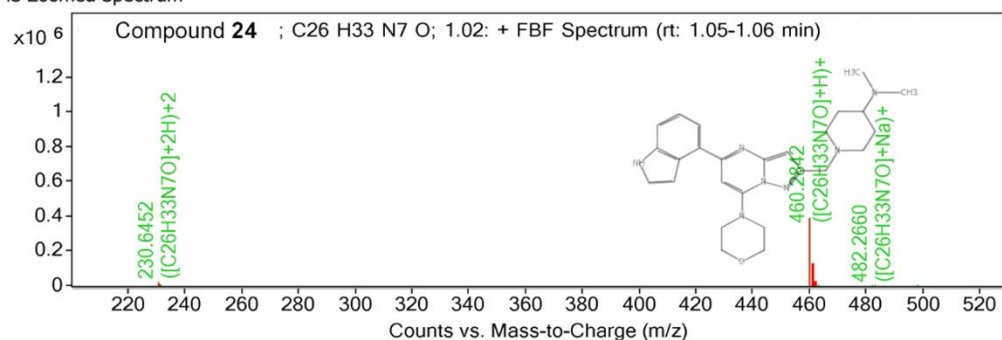

MS Zoomed Spectrum

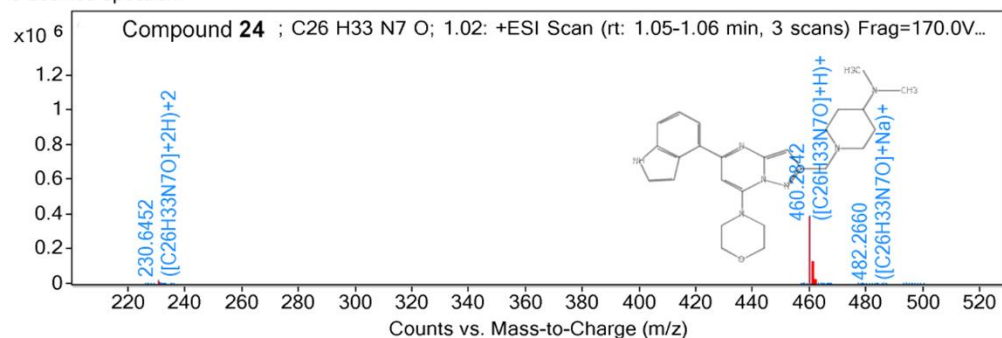

MS Spectrum Peak List

| Obs. m/z | Charge | Abund     | Formula   | Ion/Isotope | Tgt Mass Error (ppm) |
|----------|--------|-----------|-----------|-------------|----------------------|
| 460.2842 | 1      | 387752.75 | C26H33N7O | (M+H)+      |                      |
| 460.2842 | 1      | 387752.75 | C26H33N7O | (M+H)+      | 5                    |

--- End Of Report ---

# Compound 25

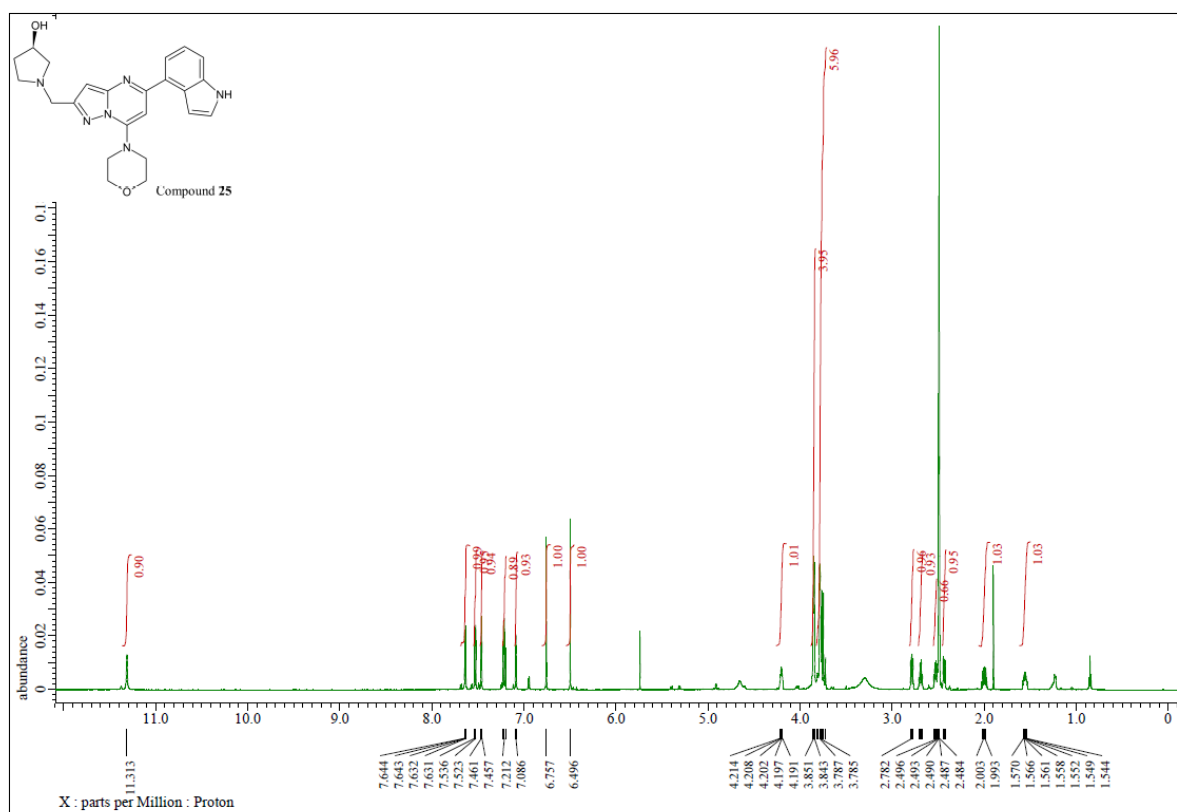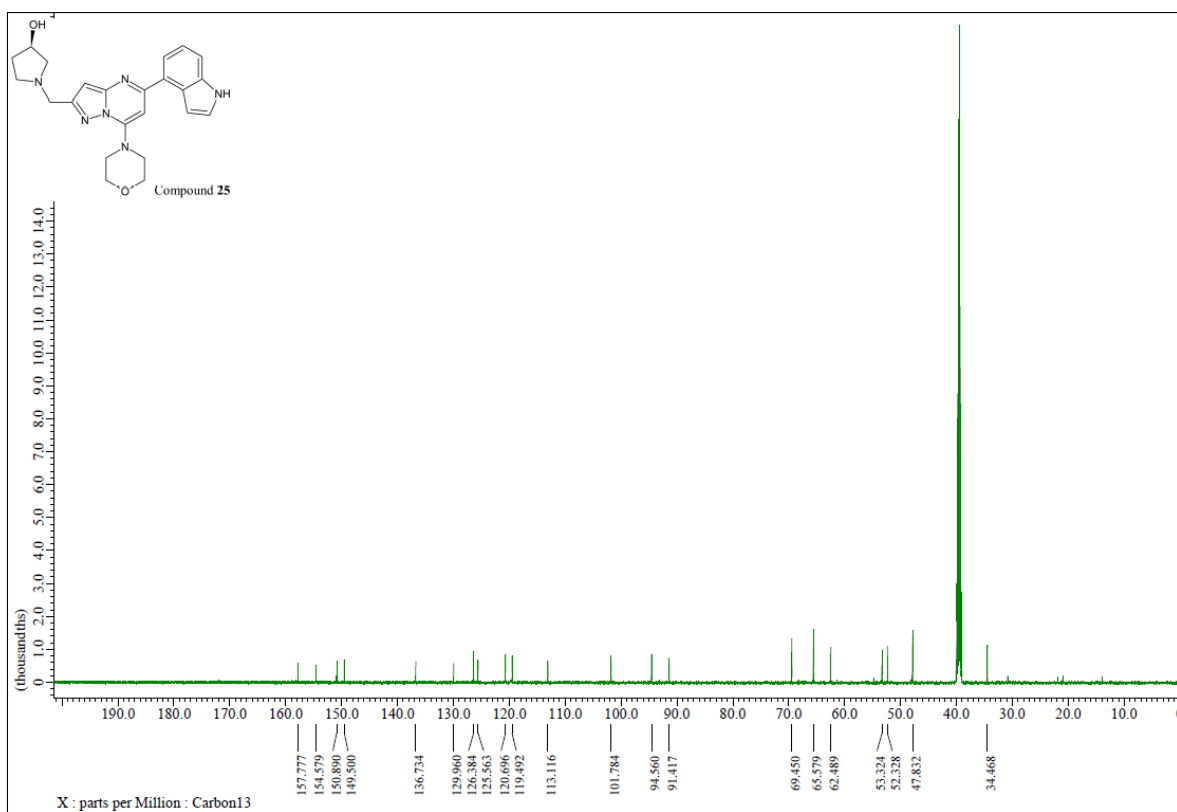



## Compound 25

| Name        | Obs. m/z  | Obs. RT | Obs. Mass | Tgt Formula   | Tgt Mass  | Tgt Mass Error | Find Cpd's Algorit |
|-------------|-----------|---------|-----------|---------------|-----------|----------------|--------------------|
| Compound 25 | 419.21911 | 1.07    | 418.21196 | C23 H26 N6 O2 | 418.21172 | 0.57           | Find by Formula    |

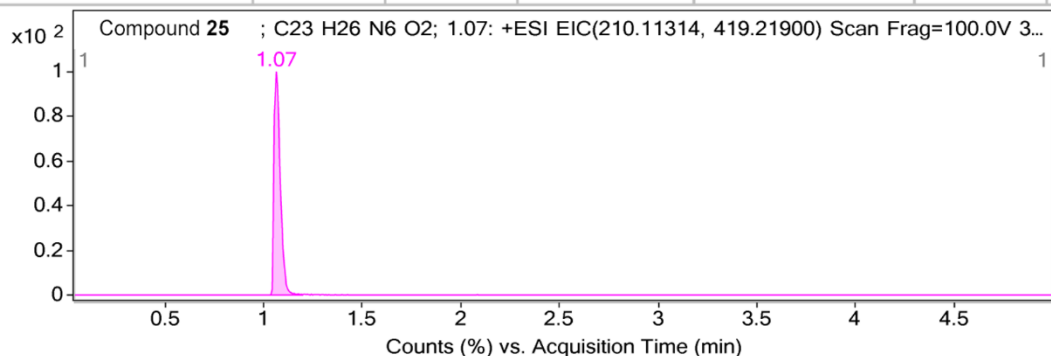

MS Zoomed Spectrum

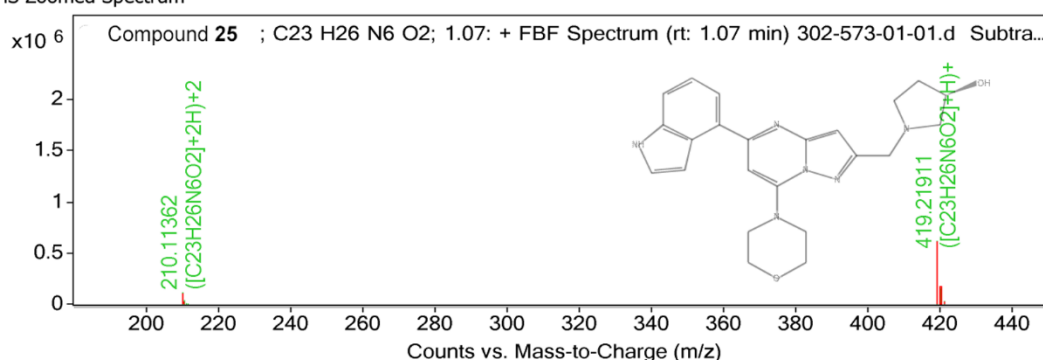

MS Zoomed Spectrum

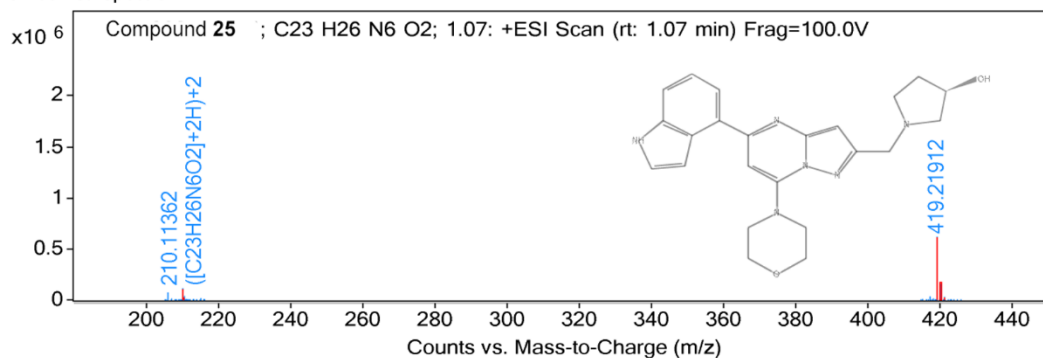

MS Spectrum Peak List

| Obs. m/z  | Charge | Abund     | Formula    | Ion/Isotope | Tgt Mass Error (ppm) |
|-----------|--------|-----------|------------|-------------|----------------------|
| 210.11362 | 2      | 107105.88 | C23H26N6O2 | (M+2H)+2    |                      |
| 210.61466 | 2      | 33089.72  | C23H26N6O2 | (M+2H)+2    |                      |
| 211.11704 | 2      | 4649.13   | C23H26N6O2 | (M+2H)+2    |                      |
| 211.61535 | 2      | 736.03    | C23H26N6O2 | (M+2H)+2    |                      |
| 419.21911 | 1      | 612612    | C23H26N6O2 | (M+H)+      |                      |
| 420.22217 | 1      | 149687.05 | C23H26N6O2 | (M+H)+      |                      |
| 421.2243  | 1      | 22332.43  | C23H26N6O2 | (M+H)+      |                      |
| 210.11362 | 2      | 107105.88 | C23H26N6O2 | (M+2H)+2    | 2.31                 |
| 210.61466 | 2      | 33089.72  | C23H26N6O2 | (M+2H)+2    | 0.38                 |
| 211.11704 | 2      | 4649.13   | C23H26N6O2 | (M+2H)+2    | 5.23                 |
| 211.61535 | 2      | 736.03    | C23H26N6O2 | (M+2H)+2    | -8.95                |
| 419.21911 | 1      | 612612    | C23H26N6O2 | (M+H)+      | 0.27                 |
| 419.21912 |        | 613355.75 |            |             |                      |
| 420.22217 | 1      | 149687.05 | C23H26N6O2 | (M+H)+      | 0.68                 |
| 421.2243  | 1      | 22332.43  | C23H26N6O2 | (M+H)+      | -0.71                |

--- End Of Report ---

# Compound 26

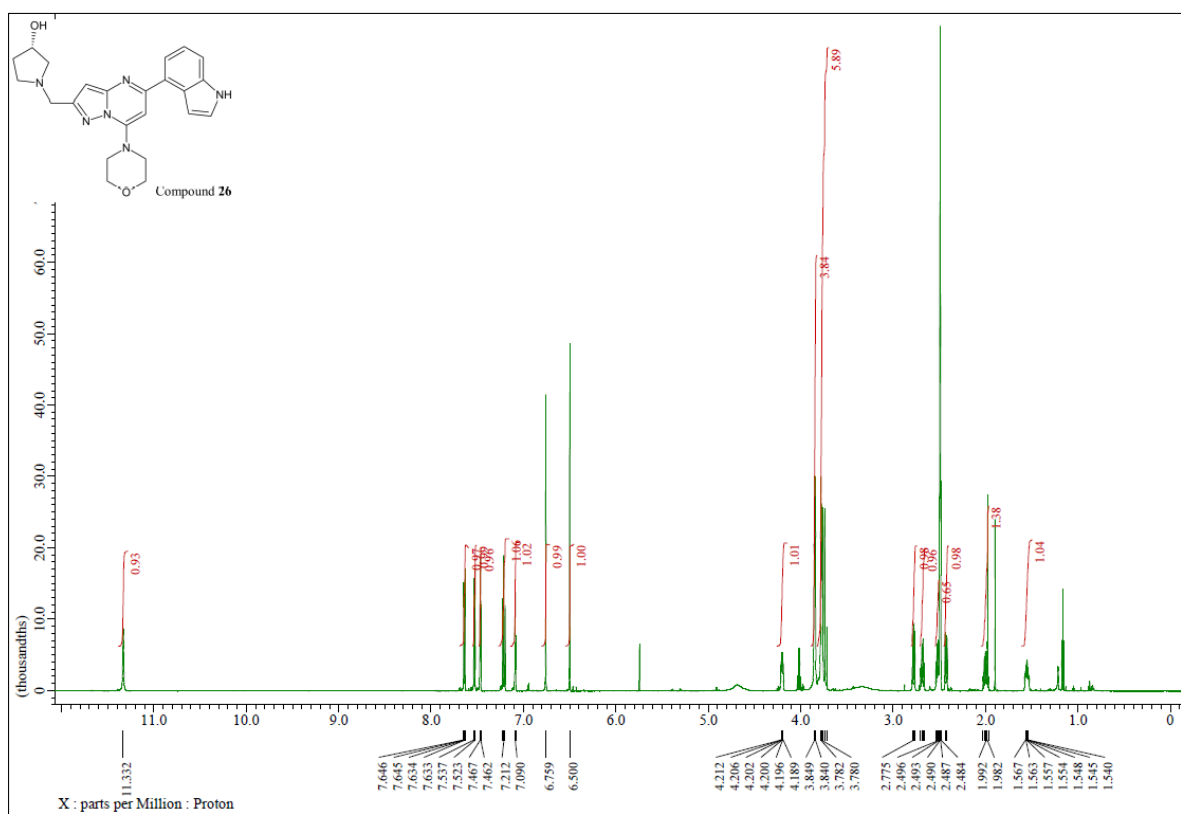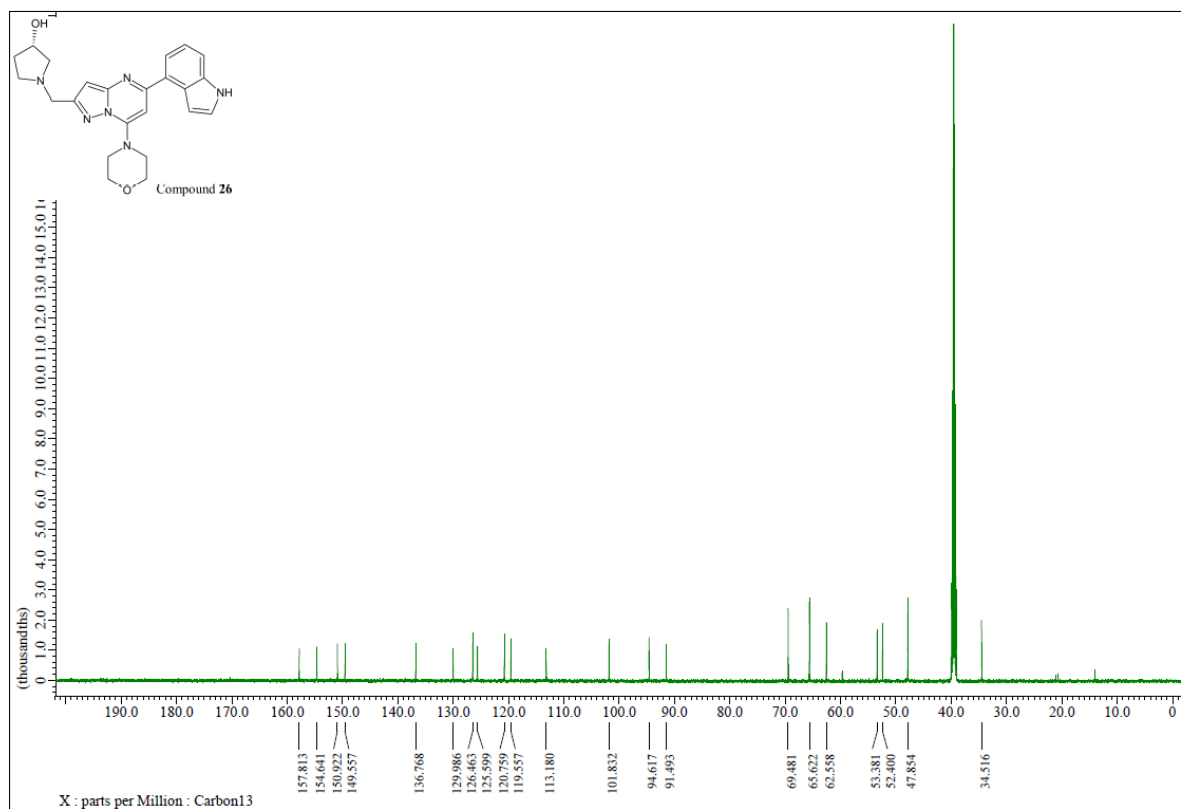

## Compound 26

| Name        | Obs. m/z  | Obs. RT | Obs. Mass | Tgt Formula   | Tgt Mass  | Tgt Mass Error | Find Cpd<br>Algorit |
|-------------|-----------|---------|-----------|---------------|-----------|----------------|---------------------|
| Compound 26 | 210.11353 | 1.06    | 418.21255 | C23 H26 N6 O2 | 418.21172 | 1.98           | Find by<br>Formula  |

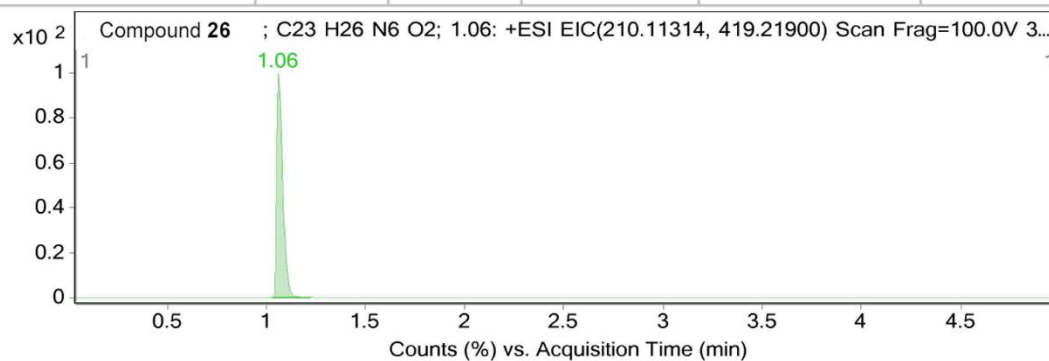

MS Zoomed Spectrum

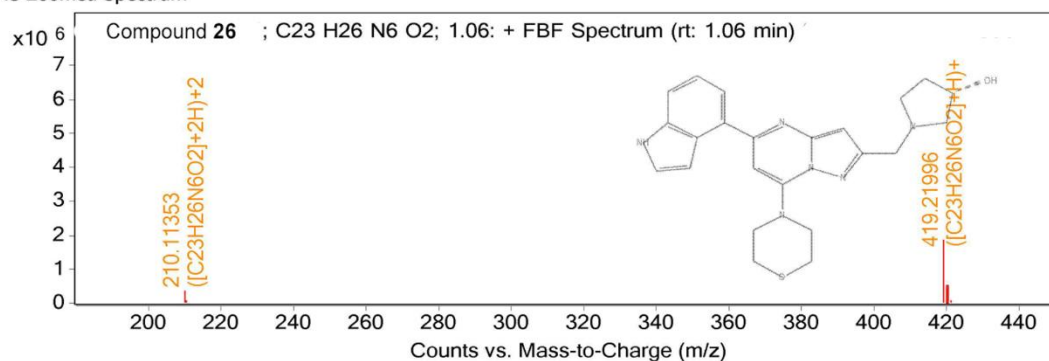

MS Zoomed Spectrum

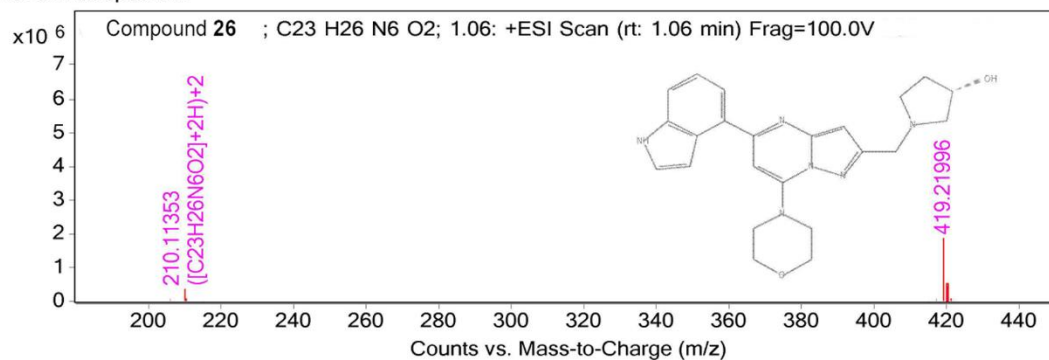

MS Spectrum Peak List

| Obs. m/z  | Charge | Abund      | Formula    | Ion/Isotope | Tgt Mass Error (ppm) |
|-----------|--------|------------|------------|-------------|----------------------|
| 210.11353 | 2      | 350755.53  | C23H26N6O2 | (M+2H)+2    |                      |
| 210.61496 | 2      | 90613.7    | C23H26N6O2 | (M+2H)+2    |                      |
| 211.11719 | 2      | 12392.01   | C23H26N6O2 | (M+2H)+2    |                      |
| 419.21996 | 1      | 1863211.5  | C23H26N6O2 | (M+H)+      |                      |
| 420.22229 | 1      | 447282     | C23H26N6O2 | (M+H)+      |                      |
| 421.2245  | 1      | 65189.49   | C23H26N6O2 | (M+H)+      |                      |
| 210.11353 | 2      | 350755.53  | C23H26N6O2 | (M+2H)+2    | 1.86                 |
| 210.61496 | 2      | 90613.7    | C23H26N6O2 | (M+2H)+2    | 1.81                 |
| 211.11719 | 2      | 12392.01   | C23H26N6O2 | (M+2H)+2    | 5.92                 |
| 419.21996 | 1      | 1863211.5  | C23H26N6O2 | (M+H)+      | 2.29                 |
| 419.21996 |        | 1864620.63 |            |             |                      |
| 420.22229 | 1      | 447282     | C23H26N6O2 | (M+H)+      | 0.97                 |
| 421.2245  | 1      | 65189.49   | C23H26N6O2 | (M+H)+      | -0.23                |

--- End Of Report ---

# Compound 27

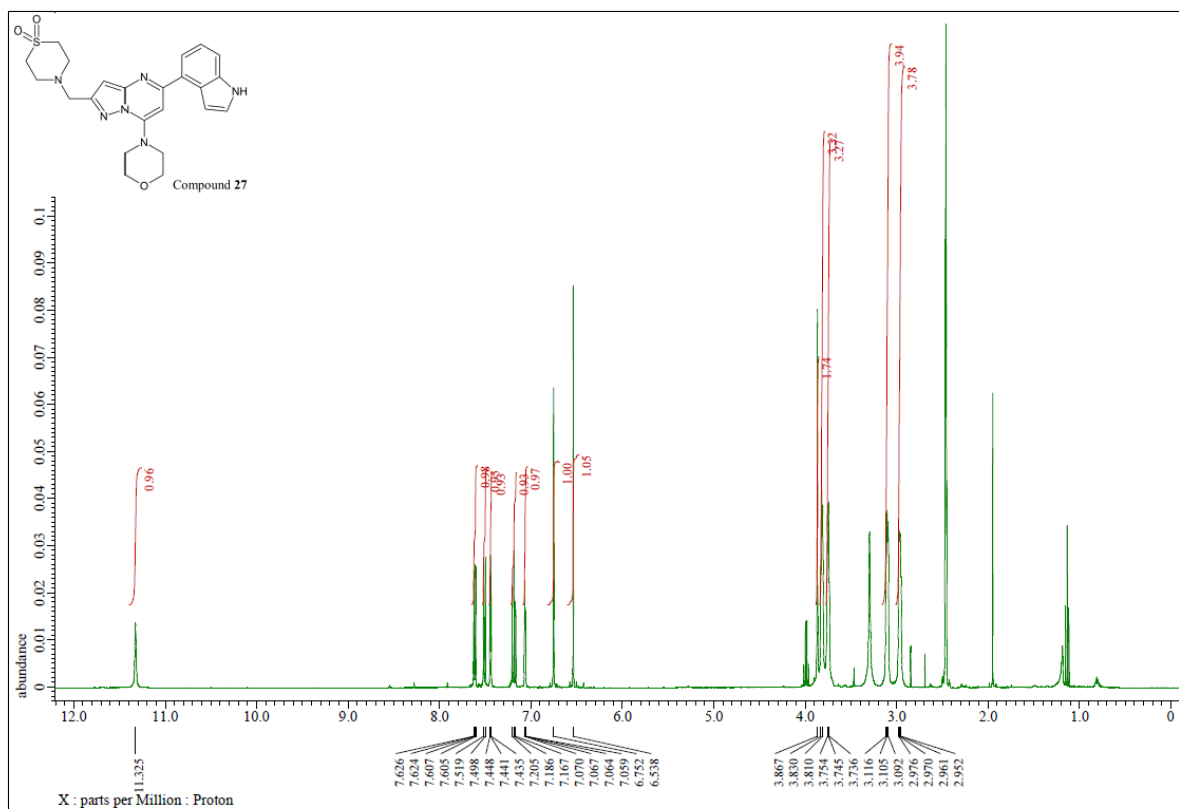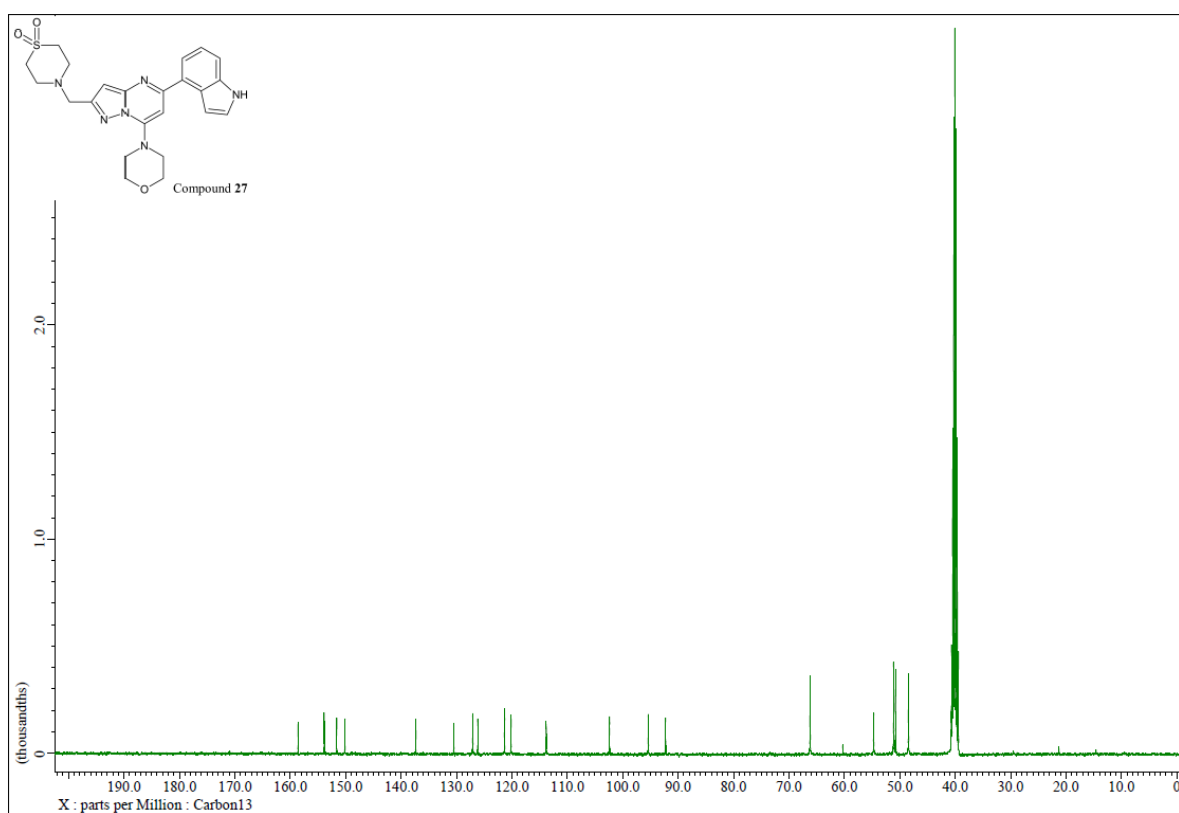

## Compound 27

| Name        | Obs. m/z  | Obs. RT | Obs. Mass | Tgt Formula     | Tgt Mass  | Tgt Mass Error | Find Cpds Algorit |
|-------------|-----------|---------|-----------|-----------------|-----------|----------------|-------------------|
| Compound 27 | 467.18662 | 1.37    | 466.17936 | C23 H26 N6 O3 S | 466.17871 | 1.4            | Find by Formula   |

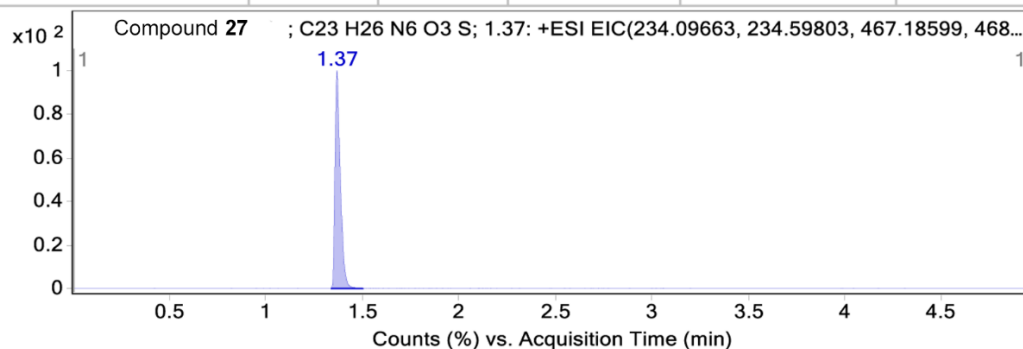

MS Zoomed Spectrum

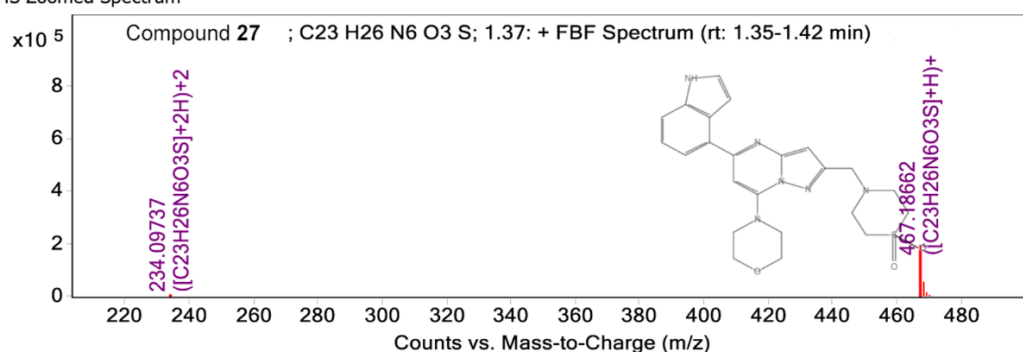

MS Zoomed Spectrum

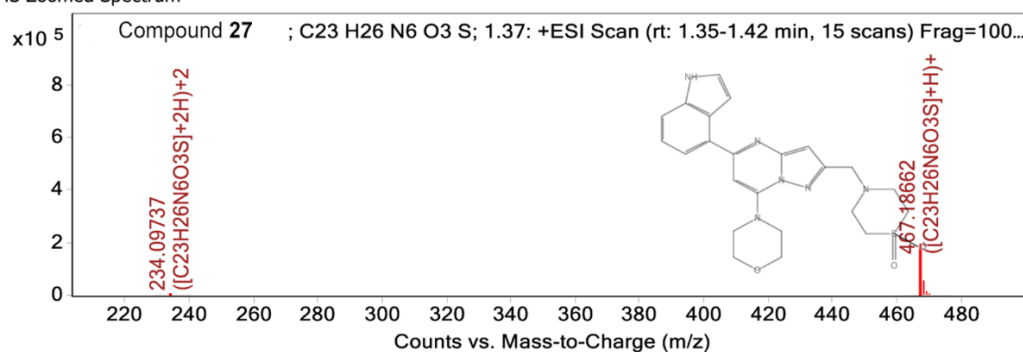

MS Spectrum Peak List

| Obs. m/z  | Charge | Abund     | Formula     | Ion/Isotope | Tgt Mass Error (ppm) |
|-----------|--------|-----------|-------------|-------------|----------------------|
| 234.09737 | 2      | 4366.86   | C23H26N6O3S | (M+2H)+2    |                      |
| 234.59878 | 2      | 1087.41   | C23H26N6O3S | (M+2H)+2    |                      |
| 235.09806 | 2      | 303.18    | C23H26N6O3S | (M+2H)+2    |                      |
| 235.59344 | 2      | 49.08     | C23H26N6O3S | (M+2H)+2    |                      |
| 467.18662 | 1      | 192986.59 | C23H26N6O3S | (M+H)+      |                      |
| 468.1894  | 1      | 54429.01  | C23H26N6O3S | (M+H)+      |                      |
| 469.18746 | 1      | 14103.24  | C23H26N6O3S | (M+H)+      |                      |
| 470.18826 | 1      | 2630.32   | C23H26N6O3S | (M+H)+      |                      |
| 471.18539 | 1      | 698.5     | C23H26N6O3S | (M+H)+      |                      |
| 234.09737 | 2      | 4366.86   | C23H26N6O3S | (M+2H)+2    | 3.17                 |
| 234.59878 | 2      | 1087.41   | C23H26N6O3S | (M+2H)+2    | 3.2                  |
| 235.09806 | 2      | 303.18    | C23H26N6O3S | (M+2H)+2    | 4.83                 |
| 235.59344 | 2      | 49.08     | C23H26N6O3S | (M+2H)+2    | -16.47               |
| 467.18662 | 1      | 192986.59 | C23H26N6O3S | (M+H)+      | 1.35                 |
| 468.1894  | 1      | 54429.01  | C23H26N6O3S | (M+H)+      | 1.32                 |
| 469.18746 | 1      | 14103.24  | C23H26N6O3S | (M+H)+      | 1.89                 |
| 470.18826 | 1      | 2630.32   | C23H26N6O3S | (M+H)+      | 1.9                  |
| 471.18539 | 1      | 698.5     | C23H26N6O3S | (M+H)+      | -7.1                 |

--- End Of Report ---

# Compound 28

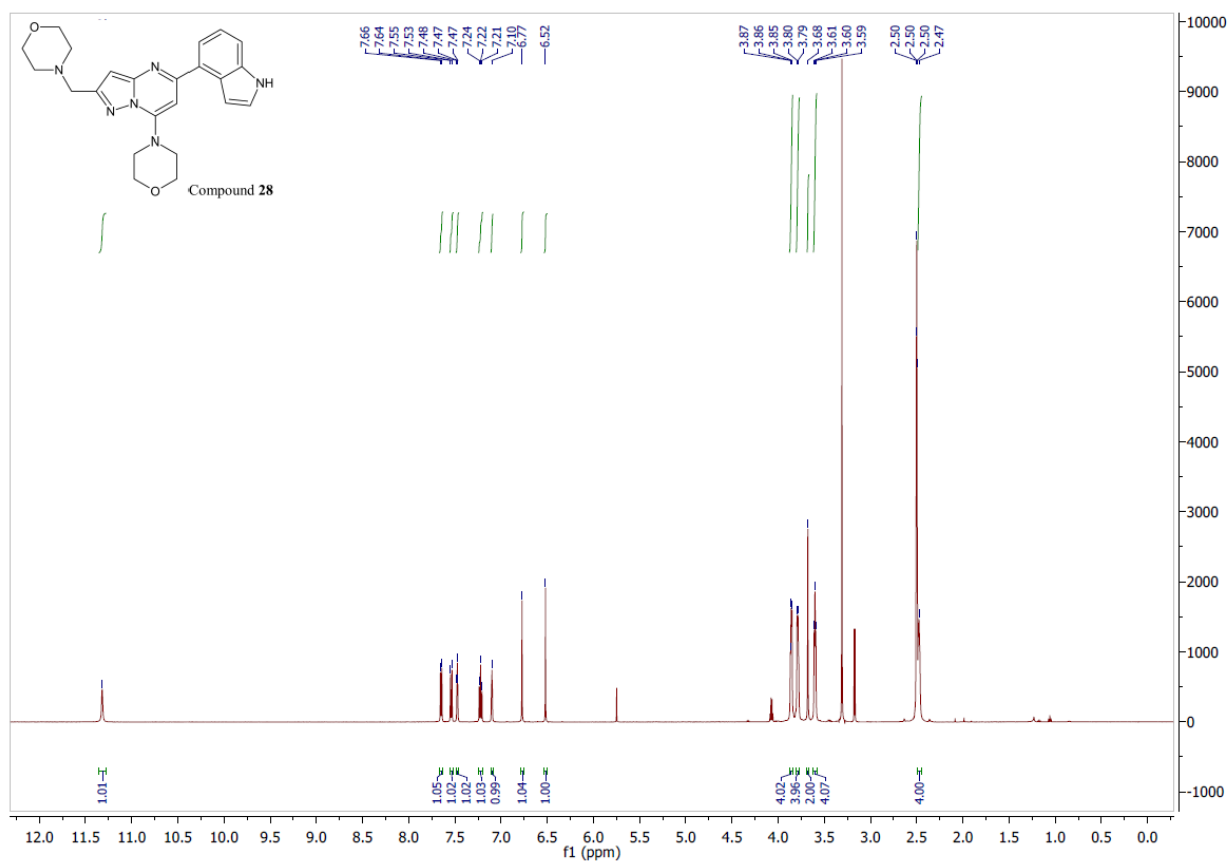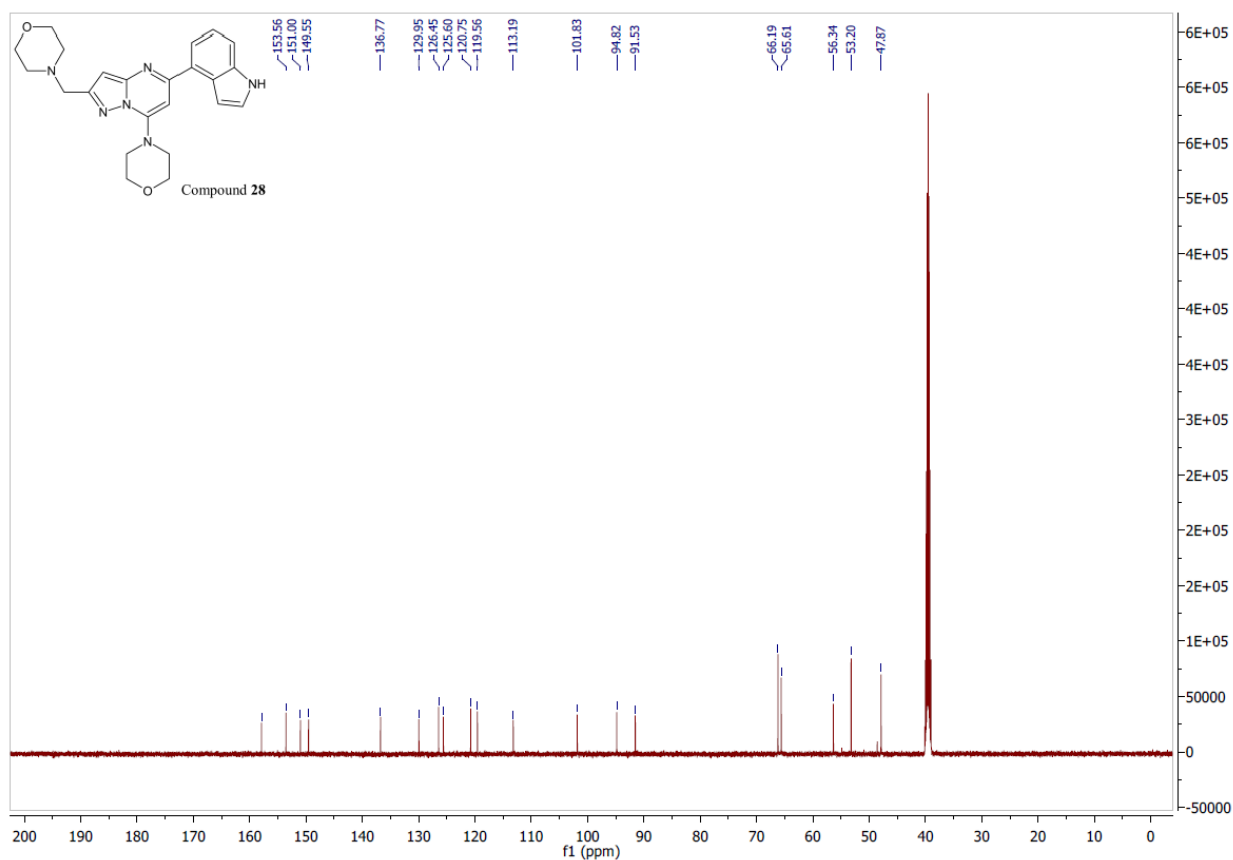

## Compound 28

| Compound Label | Name        | m/z       | RT   | Algorithm       | Mass      |
|----------------|-------------|-----------|------|-----------------|-----------|
| Compound 28    | Compound 28 | 419.21961 | 1.22 | Find by Formula | 418.21231 |

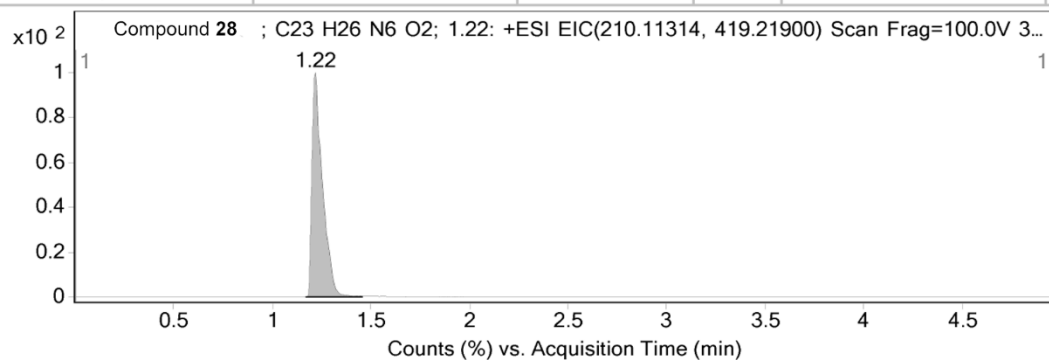

MS Spectrum

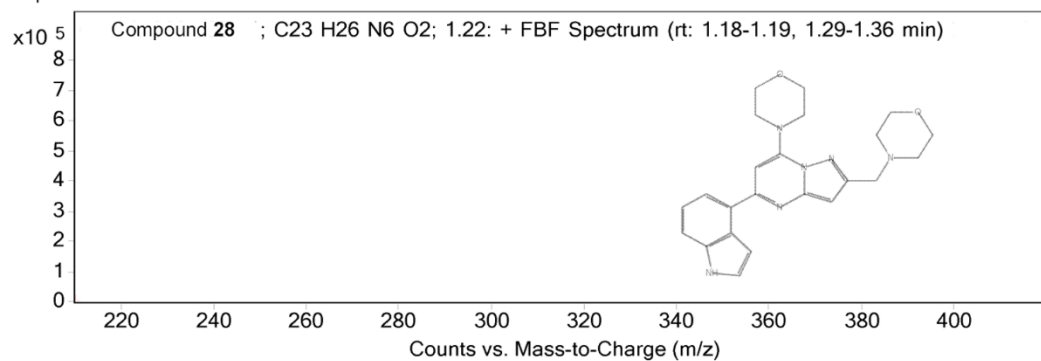

MS Zoomed Spectrum

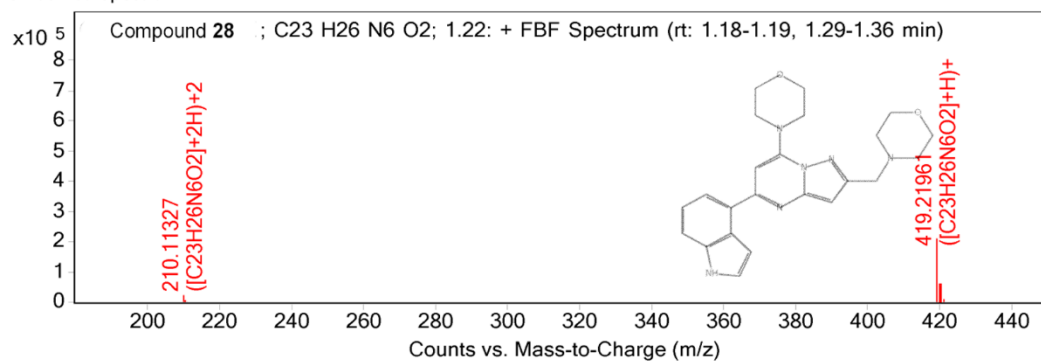

MS Spectrum Peak List

| m/z       | z | Abund     | Formula                                                       | Ion      |
|-----------|---|-----------|---------------------------------------------------------------|----------|
| 210.11327 | 2 | 21627.81  | C <sub>23</sub> H <sub>26</sub> N <sub>6</sub> O <sub>2</sub> | (M+2H)+2 |
| 210.6148  | 2 | 6590.59   | C <sub>23</sub> H <sub>26</sub> N <sub>6</sub> O <sub>2</sub> | (M+2H)+2 |
| 211.11612 | 2 | 1038.7    | C <sub>23</sub> H <sub>26</sub> N <sub>6</sub> O <sub>2</sub> | (M+2H)+2 |
| 419.21961 | 1 | 208915.36 | C <sub>23</sub> H <sub>26</sub> N <sub>6</sub> O <sub>2</sub> | (M+H)+   |
| 420.22254 | 1 | 53420.48  | C <sub>23</sub> H <sub>26</sub> N <sub>6</sub> O <sub>2</sub> | (M+H)+   |

# Compound 29

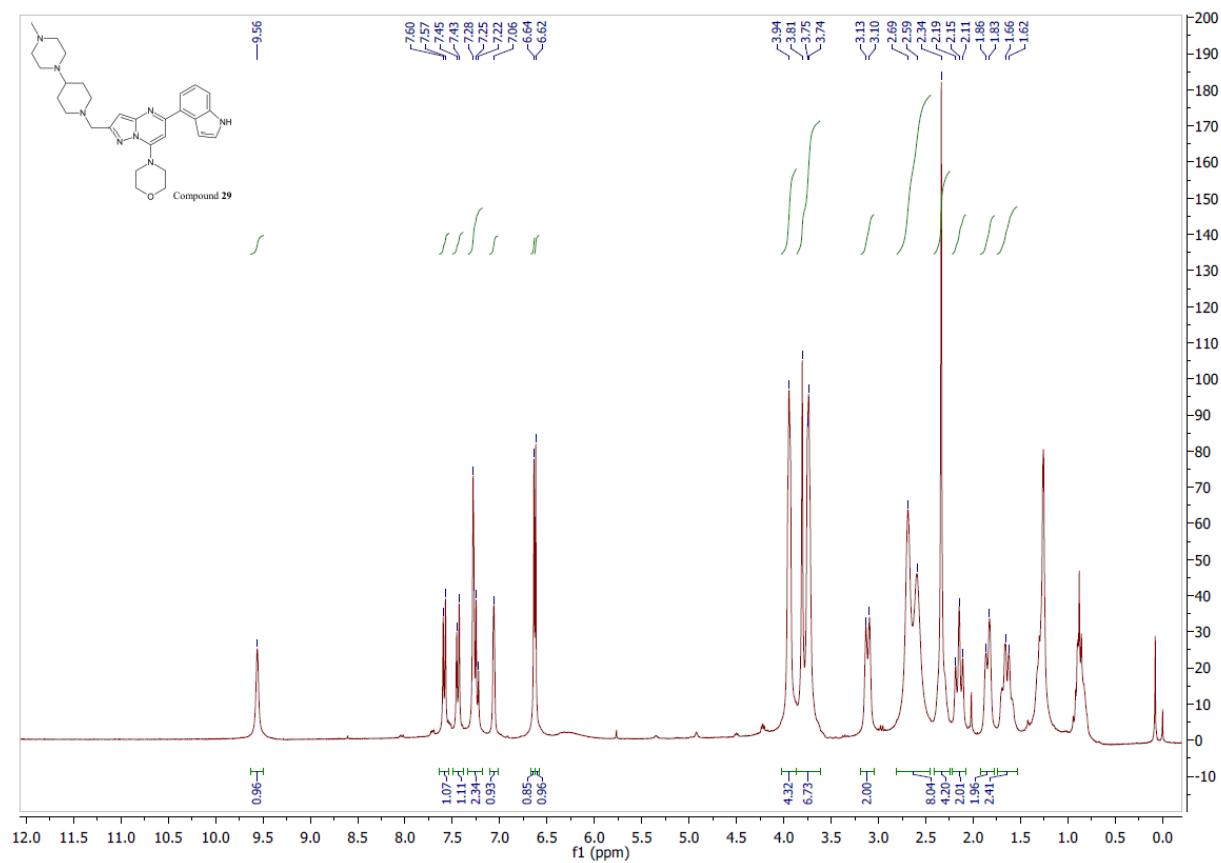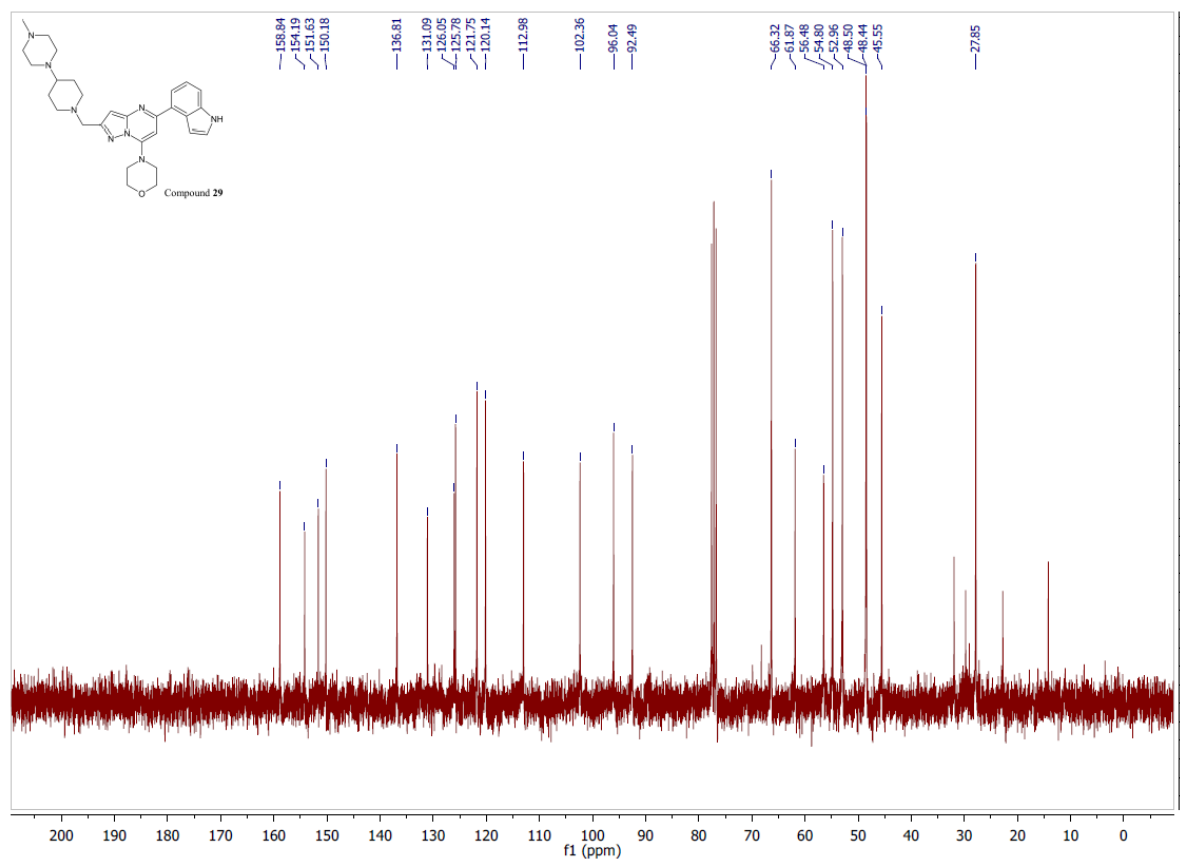



## Compound 29

| Name        | Obs. m/z  | Obs. RT | Obs. Mass | Tgt Formula  | Tgt Mass  | Tgt Mass Error | Find Cpds Algorith |
|-------------|-----------|---------|-----------|--------------|-----------|----------------|--------------------|
| Compound 29 | 258.16623 | 0.91    | 514.31764 | C29 H38 N8 O | 514.31686 | 1.51           | Find by Formula    |

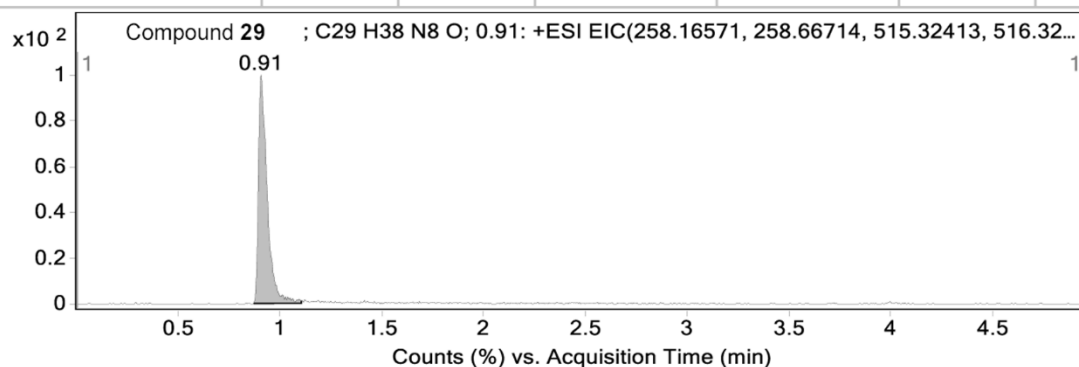

MS Zoomed Spectrum

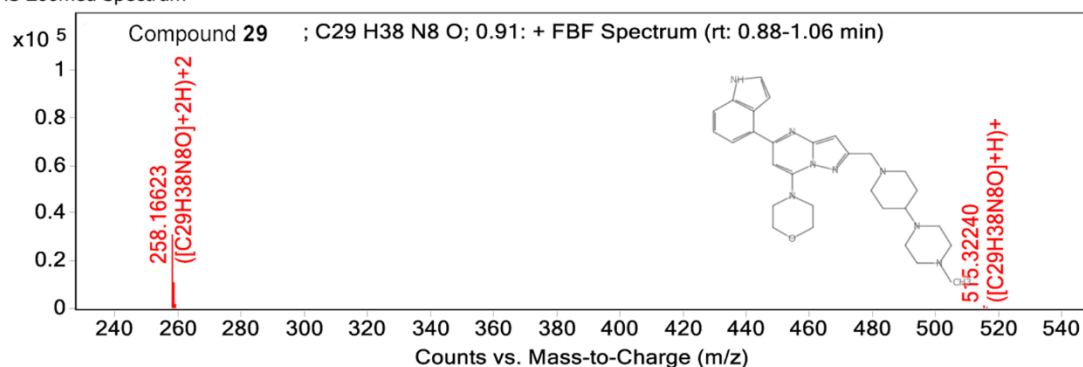

MS Zoomed Spectrum

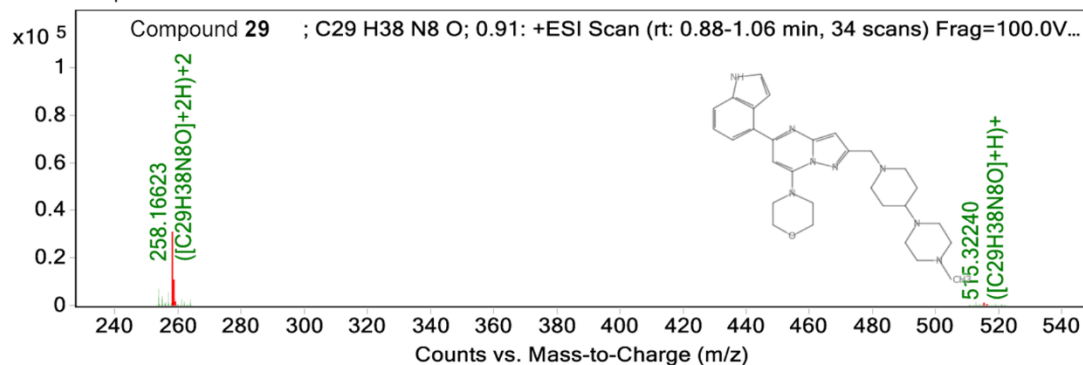

MS Spectrum Peak List

| Obs. m/z  | Charge | Abund    | Formula   | Ion/Isotope | Tgt Mass Error (ppm) |
|-----------|--------|----------|-----------|-------------|----------------------|
| 258.16623 | 2      | 30690.7  | C29H38N8O | (M+2H)+2    |                      |
| 258.66762 | 2      | 10530.33 | C29H38N8O | (M+2H)+2    |                      |
| 259.16777 | 2      | 2840.49  | C29H38N8O | (M+2H)+2    |                      |
| 259.66954 | 2      | 271.58   | C29H38N8O | (M+2H)+2    |                      |
| 515.3224  | 1      | 978.89   | C29H38N8O | (M+H)+      |                      |
| 516.32472 | 1      | 341.54   | C29H38N8O | (M+H)+      |                      |
| 517.32756 | 1      | 45.86    | C29H38N8O | (M+H)+      |                      |
| 258.16623 | 2      | 30690.7  | C29H38N8O | (M+2H)+2    | 2.05                 |
| 258.66762 | 2      | 10530.33 | C29H38N8O | (M+2H)+2    | 1.87                 |
| 259.16777 | 2      | 2840.49  | C29H38N8O | (M+2H)+2    | -2.93                |
| 259.66954 | 2      | 271.58   | C29H38N8O | (M+2H)+2    | -1.38                |
| 515.3224  | 1      | 978.89   | C29H38N8O | (M+H)+      | -3.37                |
| 516.32472 | 1      | 341.54   | C29H38N8O | (M+H)+      | -4.42                |
| 517.32756 | 1      | 45.86    | C29H38N8O | (M+H)+      | -4.31                |

--- End Of Report ---

# Compound 30

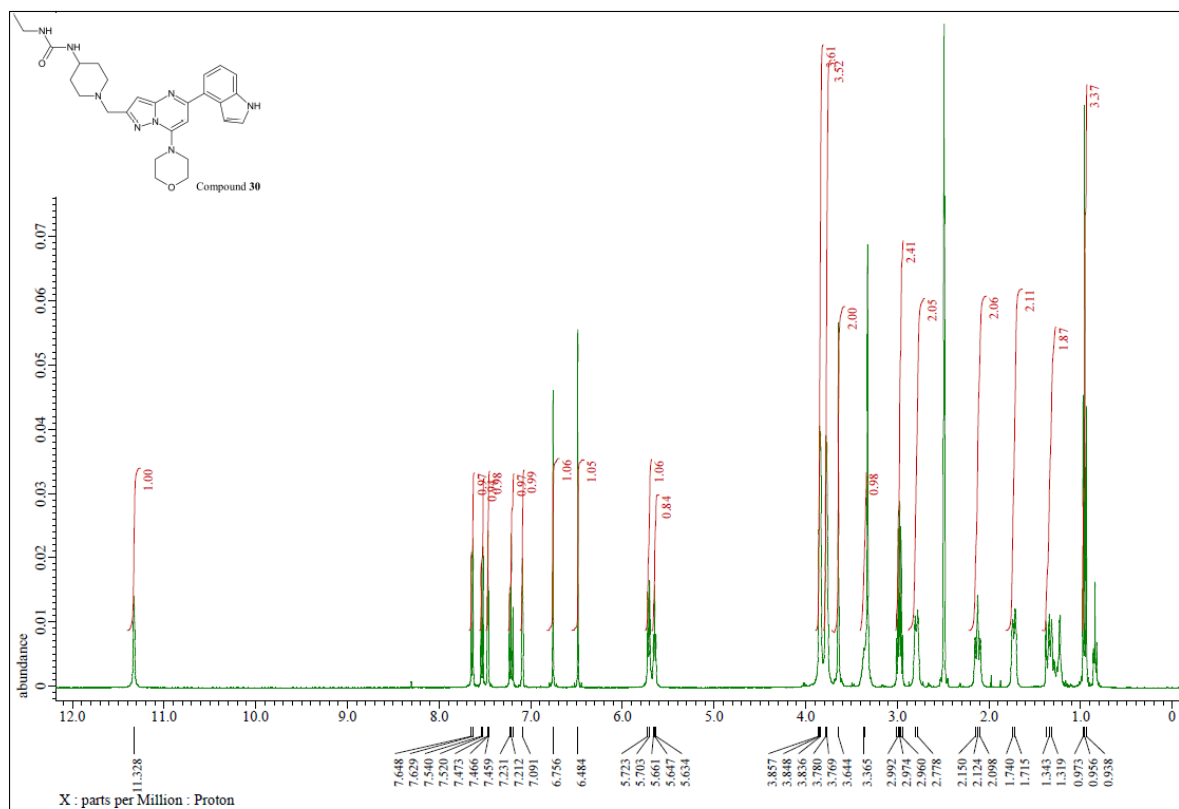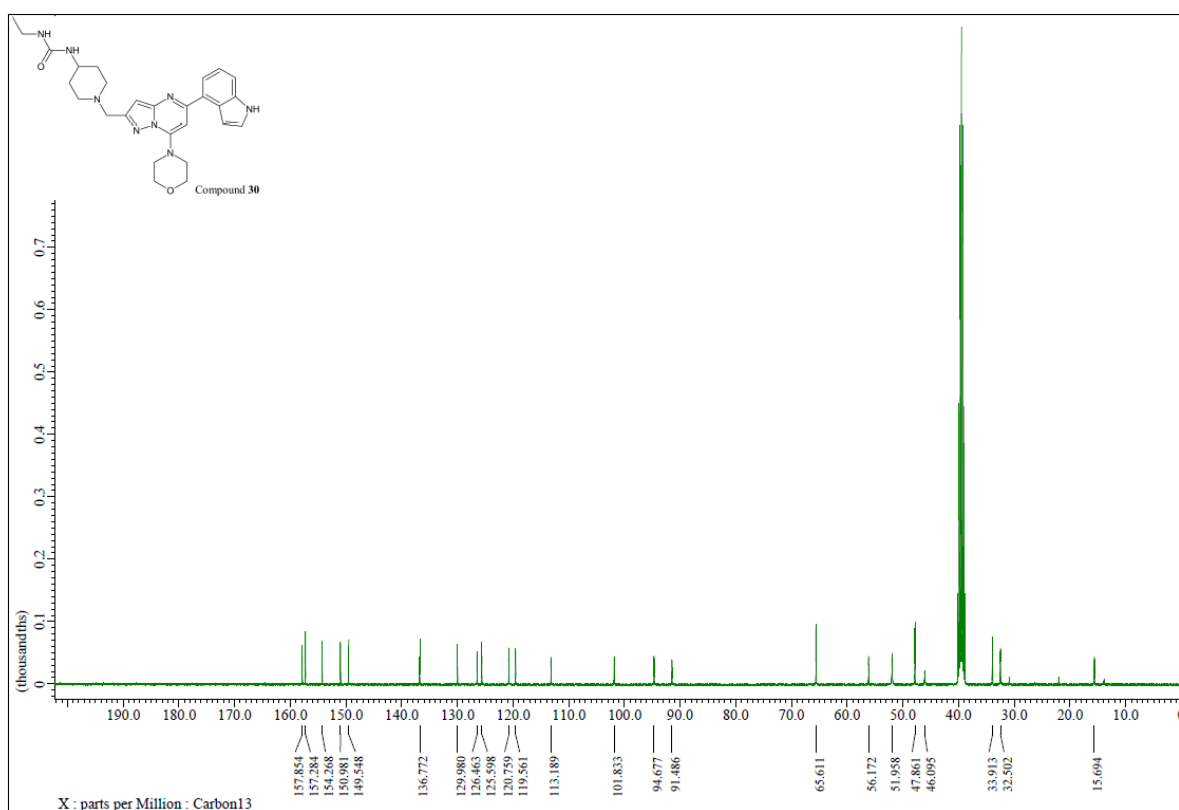

# Compound 30

| Name        | Obs. m/z  | Obs. RT | Obs. Mass | Tgt Formula   | Tgt Mass  | Tgt Mass Error | Find Cpds Alaorith |
|-------------|-----------|---------|-----------|---------------|-----------|----------------|--------------------|
| Compound 30 | 503.28816 | 1.12    | 502.28111 | C27 H34 N8 O2 | 502.28047 | 1.26           | Find by Formula    |

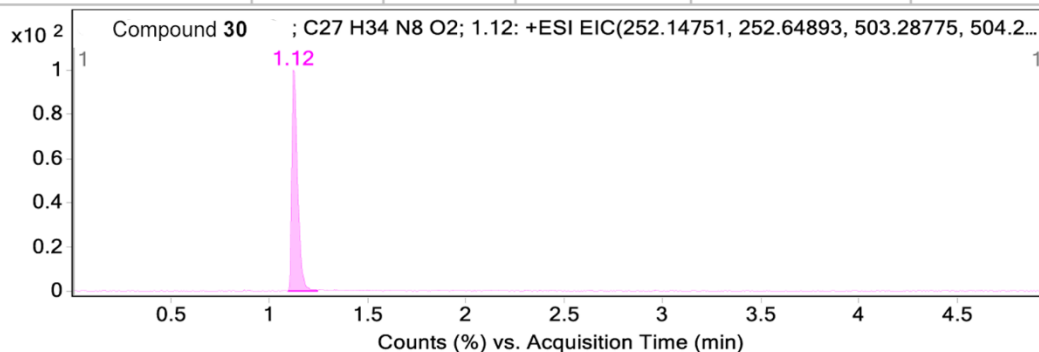

MS Zoomed Spectrum

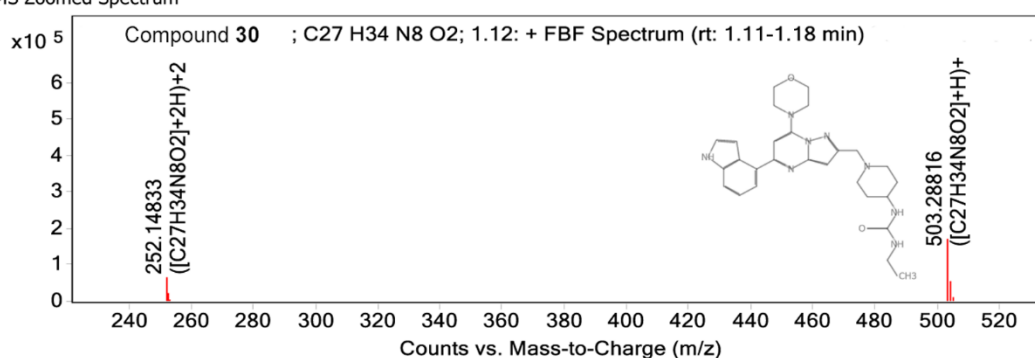

MS Zoomed Spectrum

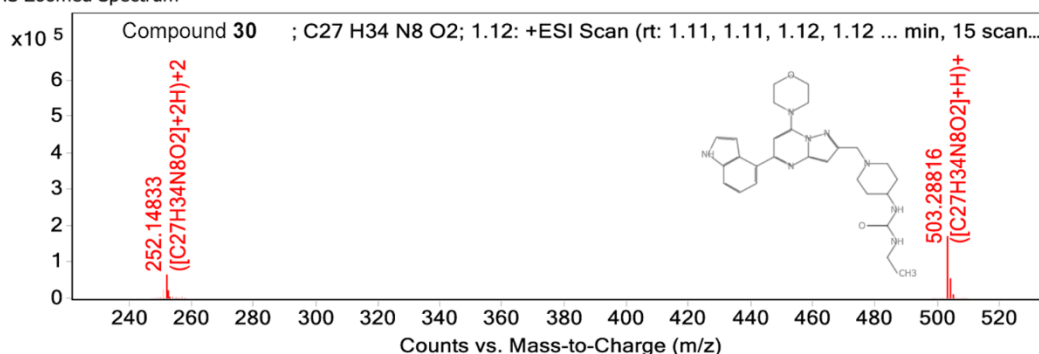

MS Spectrum Peak List

| Obs. m/z  | Charge | Abund     | Formula    | Ion/Isotope | Tgt Mass Error (ppm) |
|-----------|--------|-----------|------------|-------------|----------------------|
| 252.14833 | 2      | 64928.3   | C27H34N8O2 | (M+2H)+2    |                      |
| 252.64947 | 2      | 21703.73  | C27H34N8O2 | (M+2H)+2    |                      |
| 253.14989 | 2      | 4265.57   | C27H34N8O2 | (M+2H)+2    |                      |
| 253.6516  | 2      | 378.26    | C27H34N8O2 | (M+2H)+2    |                      |
| 503.28816 | 1      | 170039.05 | C27H34N8O2 | (M+H)+      |                      |
| 504.29073 | 1      | 51172.18  | C27H34N8O2 | (M+H)+      |                      |
| 505.29311 | 1      | 8059.46   | C27H34N8O2 | (M+H)+      |                      |
| 252.14833 | 2      | 64928.3   | C27H34N8O2 | (M+2H)+2    | 3.26                 |
| 252.64947 | 2      | 21703.73  | C27H34N8O2 | (M+2H)+2    | 2.17                 |
| 253.14989 | 2      | 4265.57   | C27H34N8O2 | (M+2H)+2    | -1.55                |
| 253.6516  | 2      | 378.26    | C27H34N8O2 | (M+2H)+2    | 0.07                 |
| 503.28816 | 1      | 170039.05 | C27H34N8O2 | (M+H)+      | 0.81                 |
| 504.29073 | 1      | 51172.18  | C27H34N8O2 | (M+H)+      | 0.3                  |
| 505.29311 | 1      | 8059.46   | C27H34N8O2 | (M+H)+      | -0.34                |

--- End Of Report ---

# Compound 31

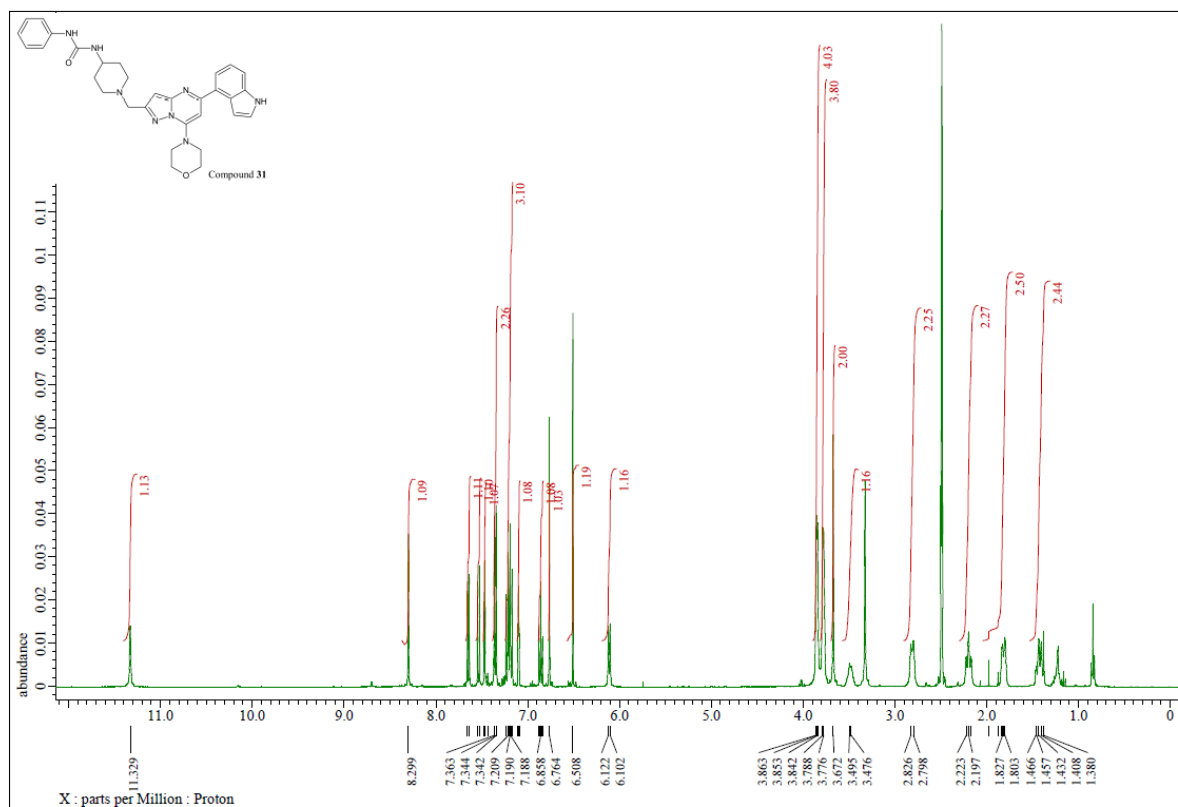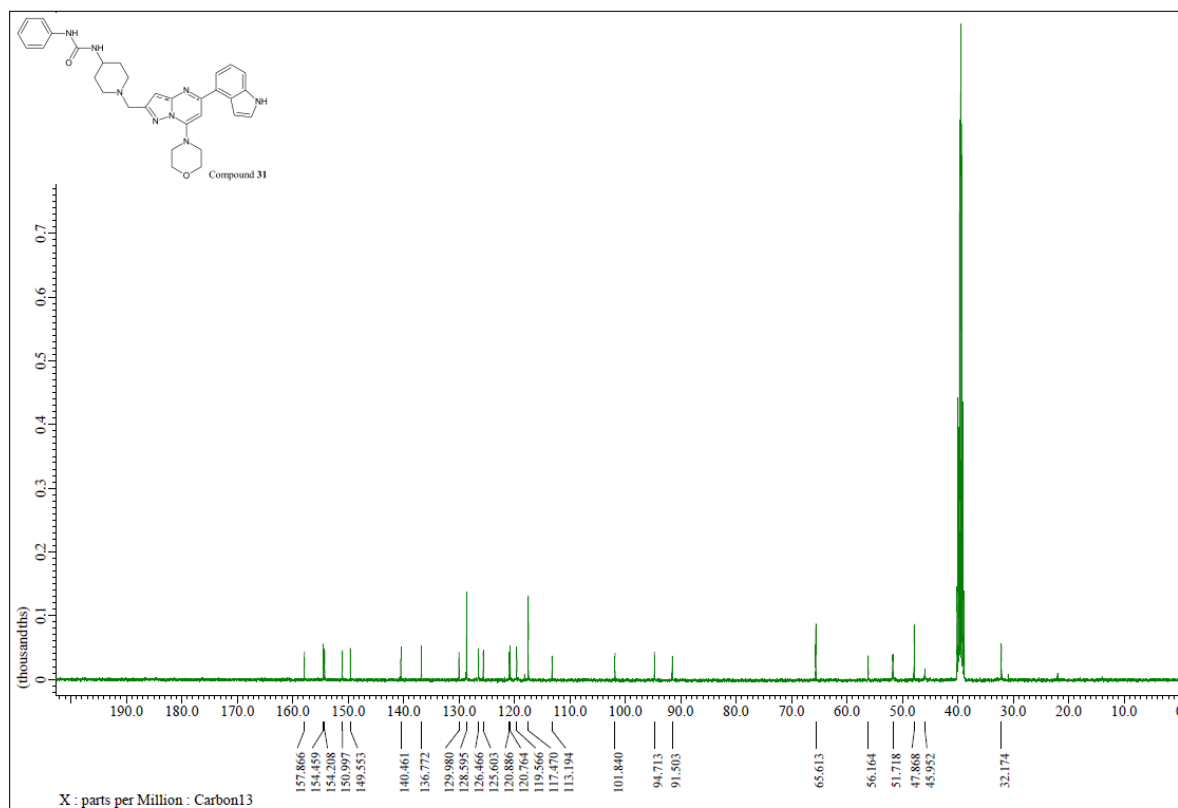

## Compound 31

| Name        | Obs. m/z  | Obs. RT | Obs. Mass | Tgt Formula   | Tgt Mass  | Tgt Mass Error | Find Cpds Algorith |
|-------------|-----------|---------|-----------|---------------|-----------|----------------|--------------------|
| Compound 31 | 551.28797 | 1.37    | 550.28084 | C31 H34 N8 O2 | 550.28047 | 0.66           | Find by Formula    |

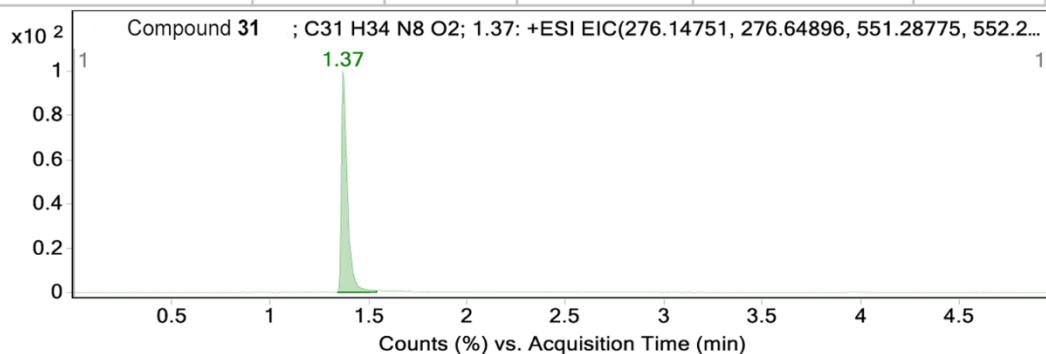

MS Zoomed Spectrum

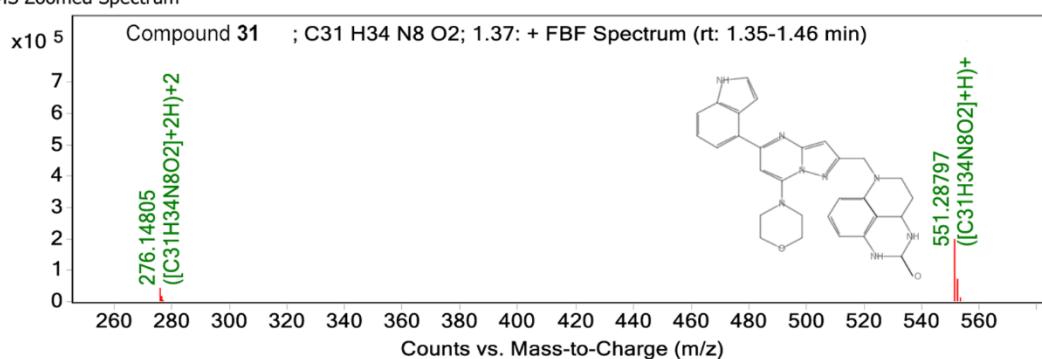

MS Zoomed Spectrum

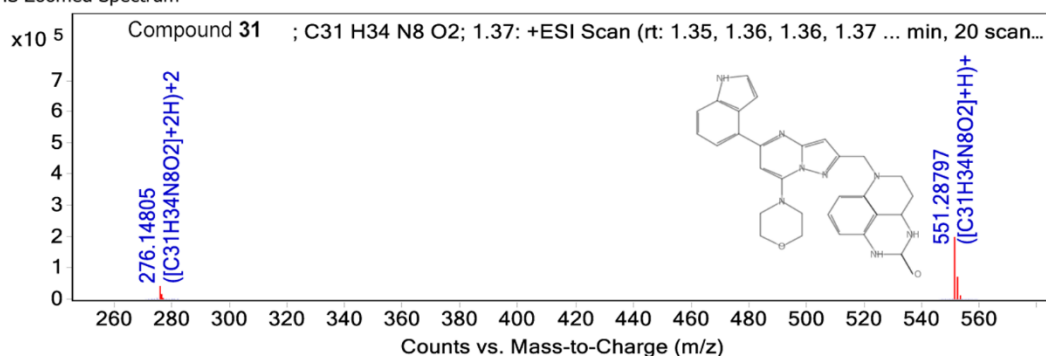

MS Spectrum Peak List

| Obs. m/z  | Charge | Abund     | Formula    | Ion/Isotope | Tgt Mass Error (ppm) |
|-----------|--------|-----------|------------|-------------|----------------------|
| 276.14805 | 2      | 40949.66  | C31H34N8O2 | (M+2H)+2    |                      |
| 276.64942 | 2      | 15629.86  | C31H34N8O2 | (M+2H)+2    |                      |
| 277.15073 | 2      | 3435.34   | C31H34N8O2 | (M+2H)+2    |                      |
| 277.65147 | 2      | 351.9     | C31H34N8O2 | (M+2H)+2    |                      |
| 551.28797 | 1      | 197852.61 | C31H34N8O2 | (M+H)+      |                      |
| 552.29099 | 1      | 69000.93  | C31H34N8O2 | (M+H)+      |                      |
| 553.29311 | 1      | 12470.17  | C31H34N8O2 | (M+H)+      |                      |
| 554.29584 | 1      | 1658.46   | C31H34N8O2 | (M+H)+      |                      |
| 276.14805 | 2      | 40949.66  | C31H34N8O2 | (M+2H)+2    | 1.94                 |
| 276.64942 | 2      | 15629.86  | C31H34N8O2 | (M+2H)+2    | 1.67                 |
| 277.15073 | 2      | 3435.34   | C31H34N8O2 | (M+2H)+2    | 1.39                 |
| 277.65147 | 2      | 351.9     | C31H34N8O2 | (M+2H)+2    | -0.83                |
| 551.28797 | 1      | 197852.61 | C31H34N8O2 | (M+H)+      | 0.4                  |
| 552.29099 | 1      | 69000.93  | C31H34N8O2 | (M+H)+      | 0.64                 |
| 553.29311 | 1      | 12470.17  | C31H34N8O2 | (M+H)+      | -0.57                |
| 554.29584 | 1      | 1658.46   | C31H34N8O2 | (M+H)+      | -0.52                |

--- End Of Report ---

# Compound 32

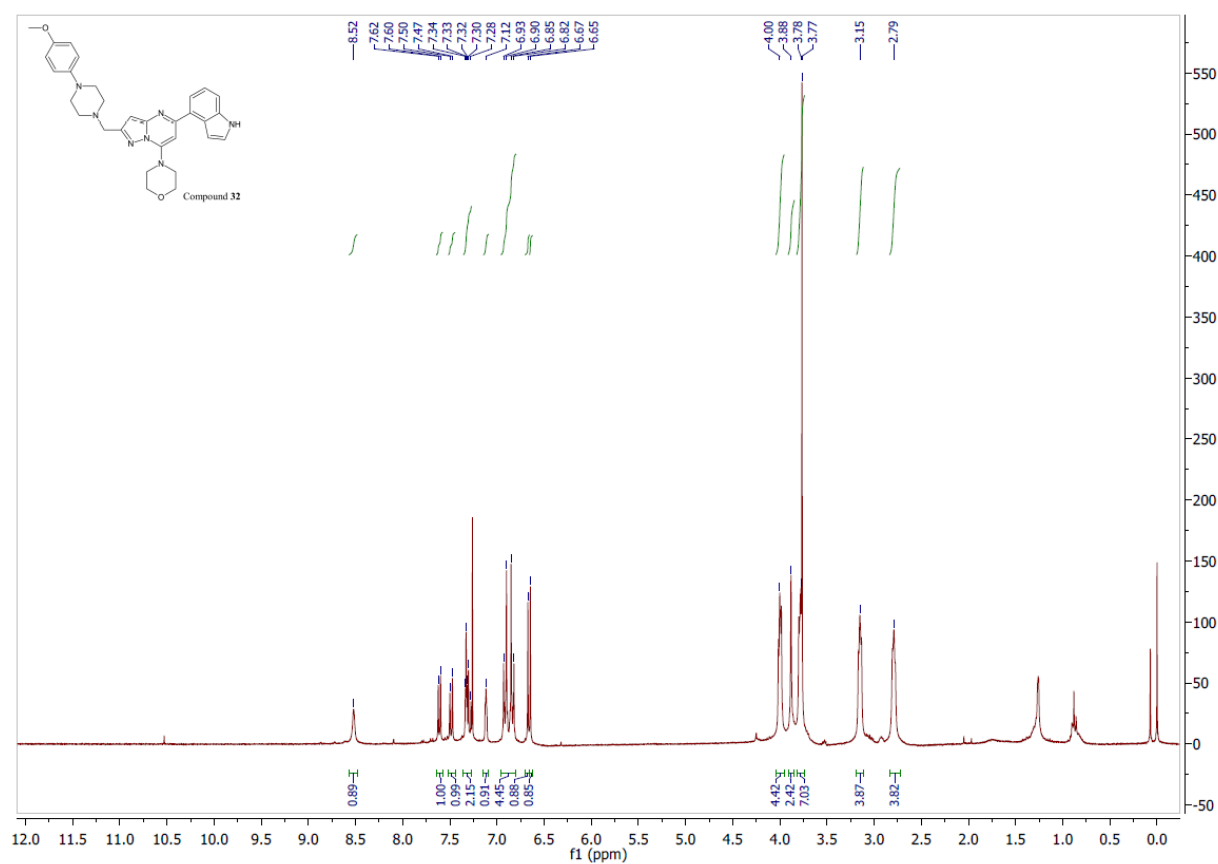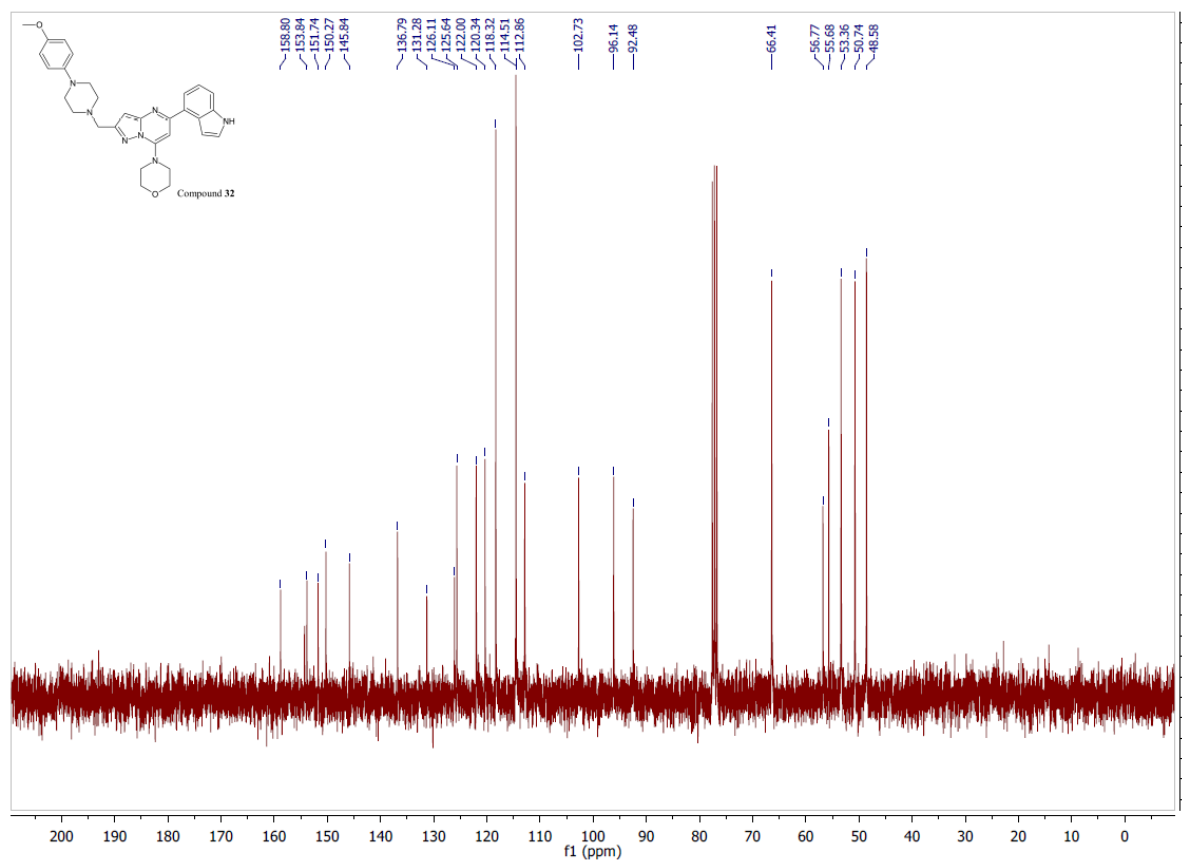

## Compound 32

| Name        | Obs. m/z  | Obs. RT | Obs. Mass | Tgt Formula   | Tgt Mass  | Tgt Mass Error | Find Cpsds Alaoirith Find by Formula |
|-------------|-----------|---------|-----------|---------------|-----------|----------------|--------------------------------------|
| Compound 32 | 524.27699 | 1.45    | 523.26996 | C30 H33 N7 O2 | 523.26957 | 0.75           |                                      |

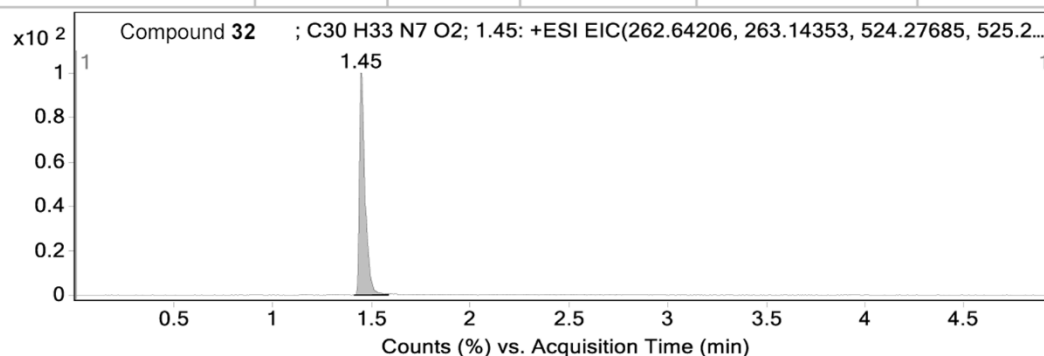

MS Zoomed Spectrum

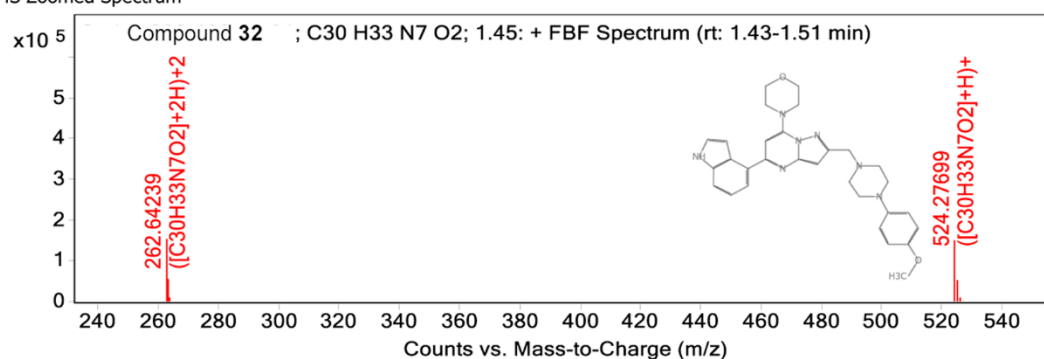

MS Zoomed Spectrum

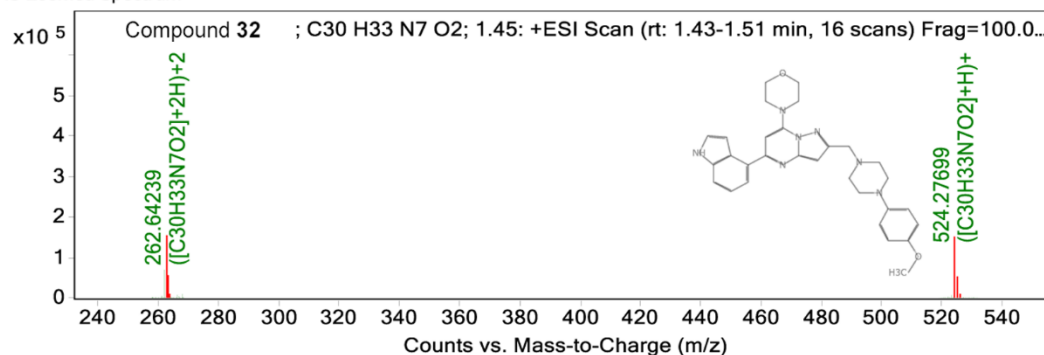

MS Spectrum Peak List

| Obs. m/z  | Charge | Abund     | Formula    | Ion/Isotope | Tgt Mass Error (ppm) |
|-----------|--------|-----------|------------|-------------|----------------------|
| 262.64239 | 2      | 153431.98 | C30H33N7O2 | (M+2H)+2    |                      |
| 263.14403 | 2      | 49281.49  | C30H33N7O2 | (M+2H)+2    |                      |
| 263.64525 | 2      | 8827.74   | C30H33N7O2 | (M+2H)+2    |                      |
| 524.27699 | 1      | 149768.55 | C30H33N7O2 | (M+H)+      |                      |
| 525.27966 | 1      | 50773.94  | C30H33N7O2 | (M+H)+      |                      |
| 526.28195 | 1      | 8617.05   | C30H33N7O2 | (M+H)+      |                      |
| 527.28537 | 1      | 1117.81   | C30H33N7O2 | (M+H)+      |                      |
| 262.64239 | 2      | 153431.98 | C30H33N7O2 | (M+2H)+2    | 1.25                 |
| 263.14403 | 2      | 49281.49  | C30H33N7O2 | (M+2H)+2    | 1.89                 |
| 263.64525 | 2      | 8827.74   | C30H33N7O2 | (M+2H)+2    | 1.18                 |
| 524.27699 | 1      | 149768.55 | C30H33N7O2 | (M+H)+      | 0.28                 |
| 525.27966 | 1      | 50773.94  | C30H33N7O2 | (M+H)+      | -0.24                |
| 526.28195 | 1      | 8617.05   | C30H33N7O2 | (M+H)+      | -1.24                |
| 527.28537 | 1      | 1117.81   | C30H33N7O2 | (M+H)+      | 0.08                 |

--- End Of Report ---

# Compound 33

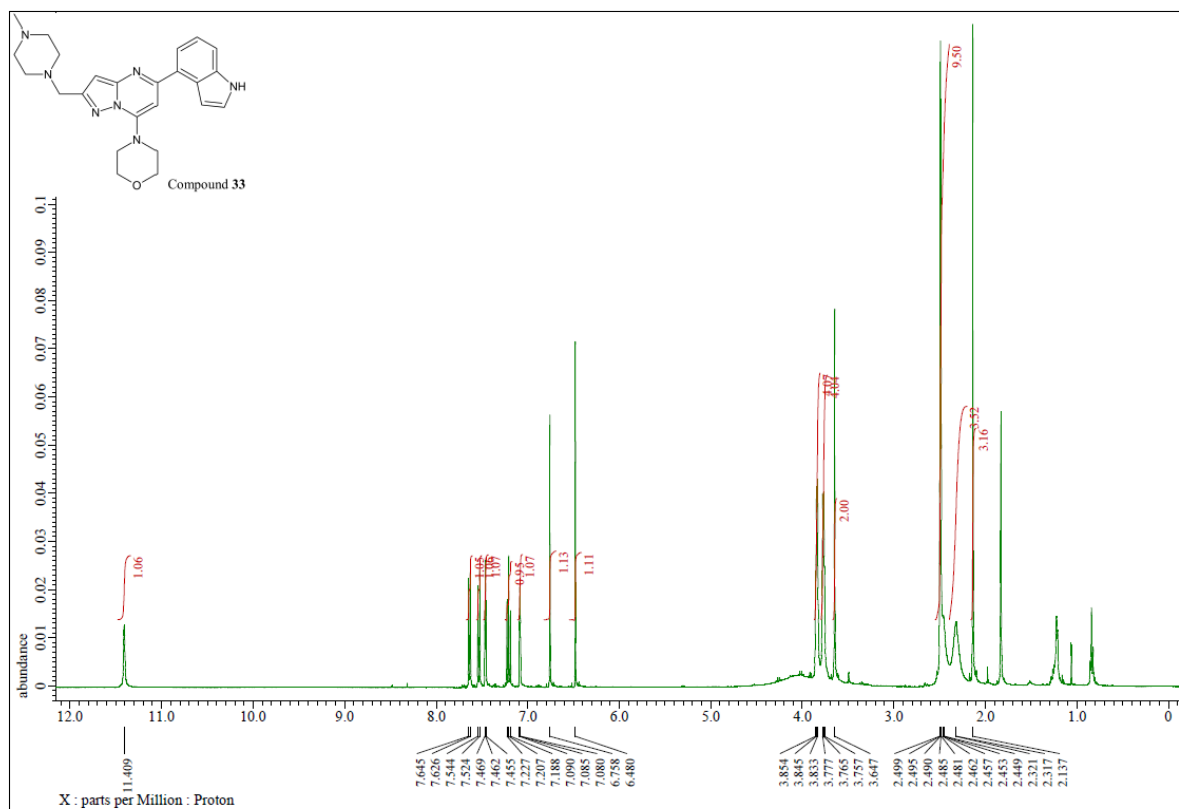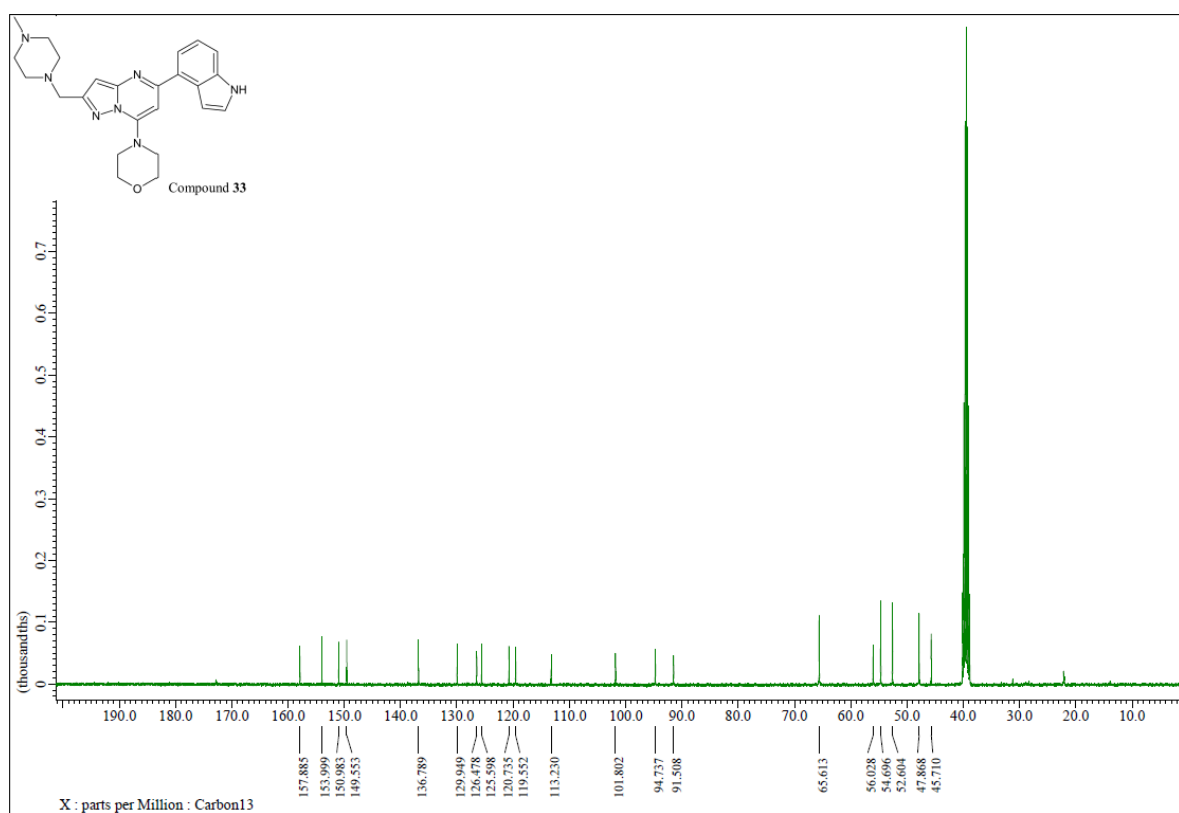



# Compound 33

| Name        | Obs. m/z  | Obs. RT | Obs. Mass | Tgt Formula  | Tgt Mass  | Tgt Mass Error | Find Cpd's Algorith |
|-------------|-----------|---------|-----------|--------------|-----------|----------------|---------------------|
| Compound 33 | 432.25113 | 0.98    | 431.24397 | C24 H29 N7 O | 431.24336 | 1.43           | Find by Formula     |

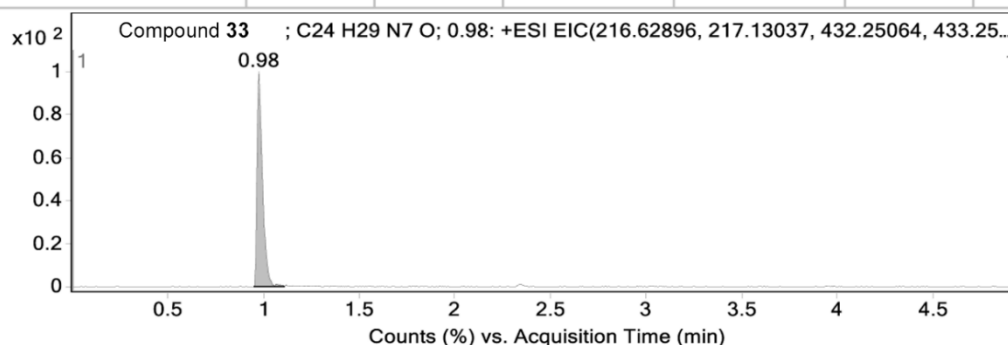

MS Zoomed Spectrum

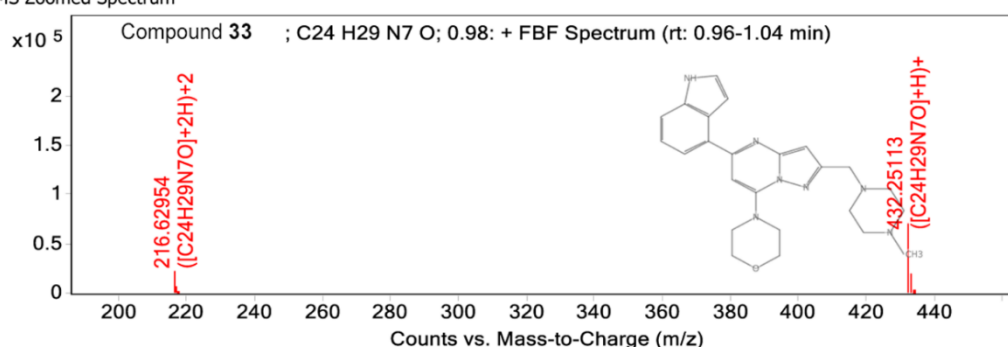

MS Zoomed Spectrum

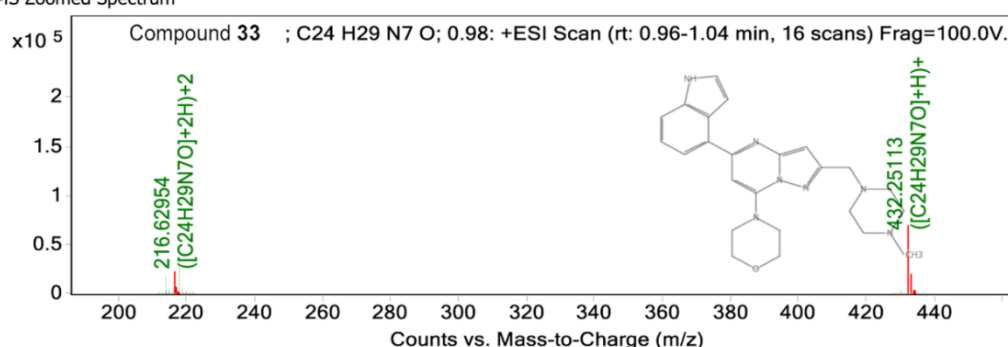

MS Spectrum Peak List

| Obs. m/z  | Charge | Abund    | Formula   | Ion/Isotope | Tgt Mass Error (ppm) |
|-----------|--------|----------|-----------|-------------|----------------------|
| 216.62954 | 2      | 21711.37 | C24H29N7O | (M+2H)+2    |                      |
| 217.13078 | 2      | 6384.77  | C24H29N7O | (M+2H)+2    |                      |
| 217.63214 | 2      | 939.34   | C24H29N7O | (M+2H)+2    |                      |
| 432.25113 | 1      | 69948.29 | C24H29N7O | (M+H)+      |                      |
| 433.25391 | 1      | 19650.1  | C24H29N7O | (M+H)+      |                      |
| 434.2564  | 1      | 2730.67  | C24H29N7O | (M+H)+      |                      |
| 435.25842 | 1      | 318.43   | C24H29N7O | (M+H)+      |                      |
| 216.62954 | 2      | 21711.37 | C24H29N7O | (M+2H)+2    | 2.7                  |
| 217.13078 | 2      | 6384.77  | C24H29N7O | (M+2H)+2    | 1.86                 |
| 217.63214 | 2      | 939.34   | C24H29N7O | (M+2H)+2    | 1.83                 |
| 432.25113 | 1      | 69948.29 | C24H29N7O | (M+H)+      | 1.14                 |
| 433.25391 | 1      | 19650.1  | C24H29N7O | (M+H)+      | 1.02                 |
| 434.2564  | 1      | 2730.67  | C24H29N7O | (M+H)+      | 0.44                 |
| 435.25842 | 1      | 318.43   | C24H29N7O | (M+H)+      | -1.03                |

--- End Of Report ---

# Compound 34

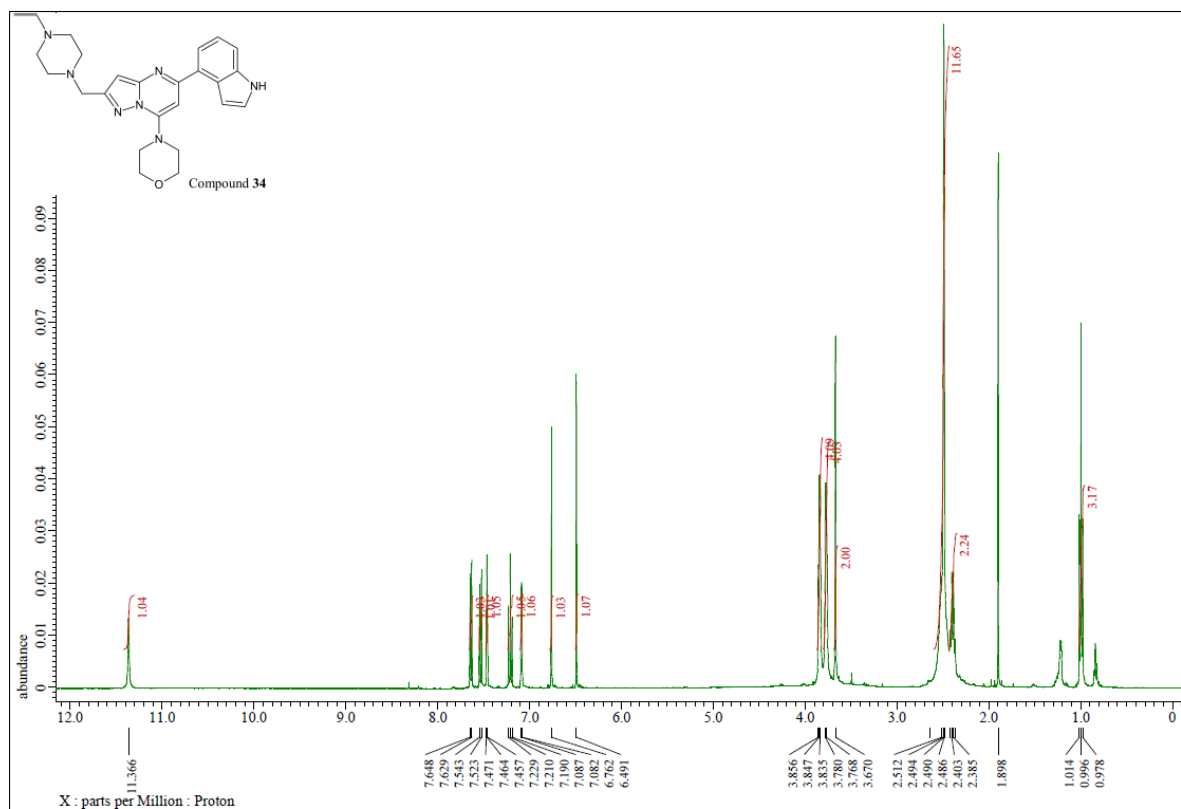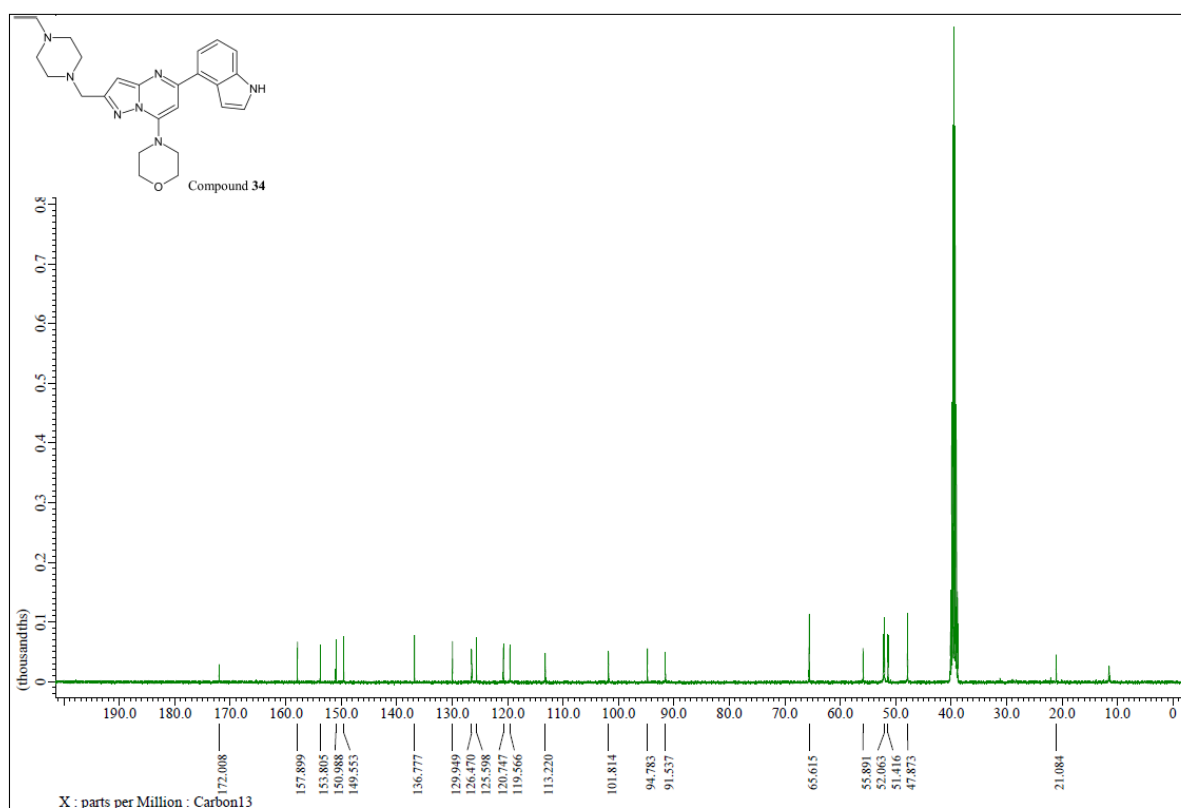

## Compound 34

| Name        | Obs. m/z  | Obs. RT | Obs. Mass | Tgt Formula  | Tgt Mass  | Tgt Mass Error | Find Cpds Algorith |
|-------------|-----------|---------|-----------|--------------|-----------|----------------|--------------------|
| Compound 34 | 446.26661 | 0.99    | 445.25954 | C25 H31 N7 O | 445.25901 | 1.19           | Find by Formula    |

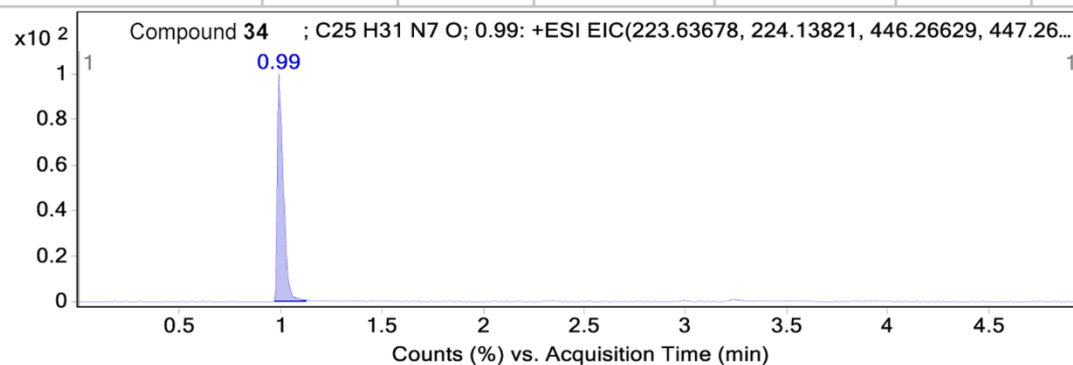

MS Zoomed Spectrum

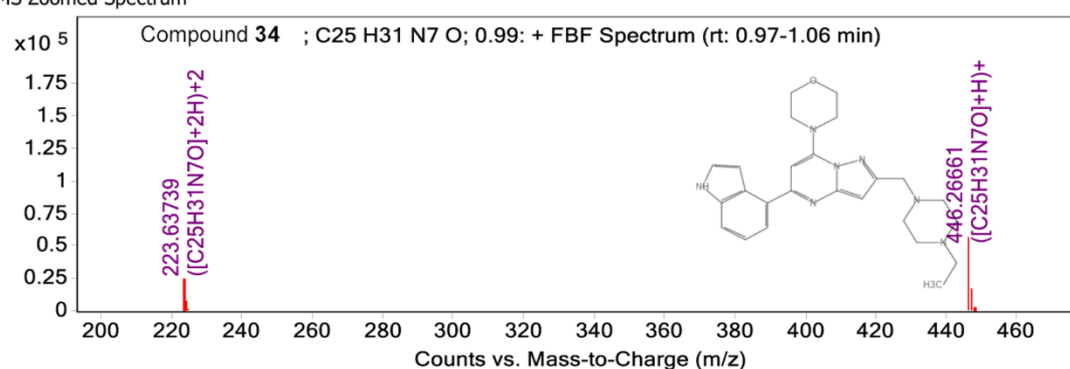

MS Zoomed Spectrum

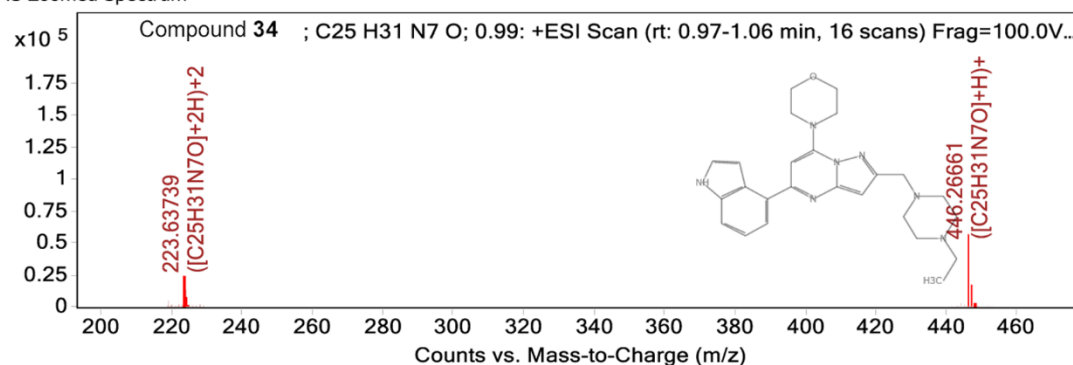

MS Spectrum Peak List

| Obs. m/z  | Charge | Abund    | Formula   | Ion/Isotope | Tgt Mass Error (ppm) |
|-----------|--------|----------|-----------|-------------|----------------------|
| 223.63739 | 2      | 23763.25 | C25H31N7O | (M+2H)+2    |                      |
| 224.6402  | 2      | 1095.98  | C25H31N7O | (M+2H)+2    |                      |
| 446.26661 | 1      | 56774.48 | C25H31N7O | (M+H)+      |                      |
| 447.26924 | 1      | 15807.67 | C25H31N7O | (M+H)+      |                      |
| 448.27271 | 1      | 2984.79  | C25H31N7O | (M+H)+      |                      |
| 223.63739 | 2      | 23763.25 | C25H31N7O | (M+2H)+2    | 2.74                 |
| 224.6402  | 2      | 1095.98  | C25H31N7O | (M+2H)+2    | 2.7                  |
| 446.26661 | 1      | 56774.48 | C25H31N7O | (M+H)+      | 0.74                 |
| 447.26924 | 1      | 15807.67 | C25H31N7O | (M+H)+      | 0.22                 |
| 448.27271 | 1      | 2984.79  | C25H31N7O | (M+H)+      | 1.8                  |

--- End Of Report ---

# Compound 35

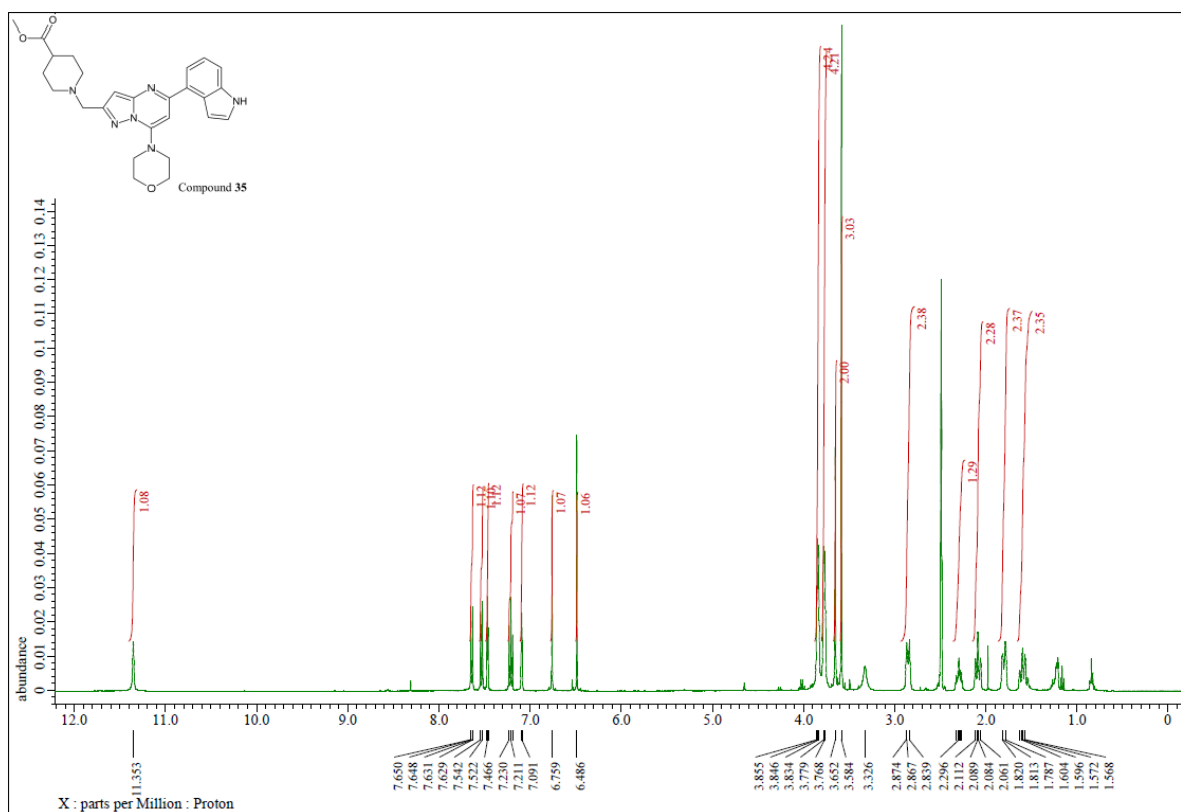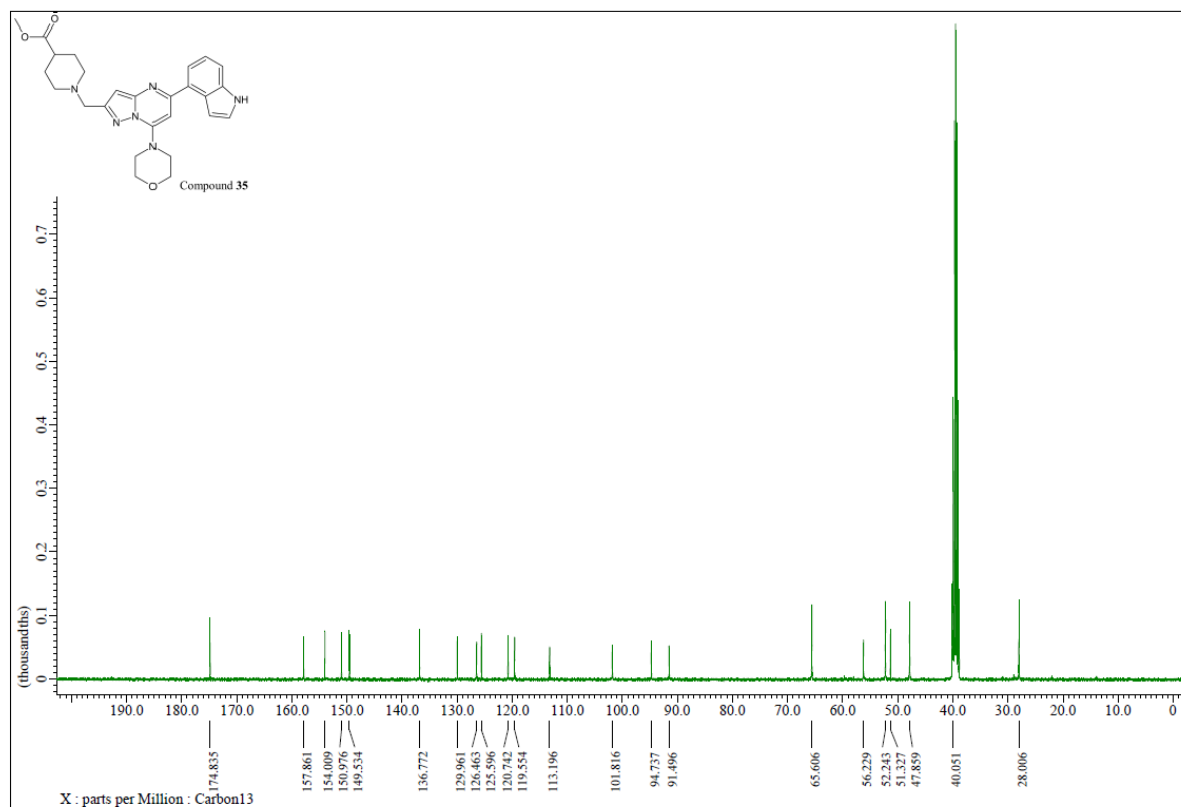

## Compound 35

| Name        | Obs. m/z  | Obs. RT | Obs. Mass | Tgt Formula   | Tgt Mass  | Tgt Mass Error | Find Cpds Algorith |
|-------------|-----------|---------|-----------|---------------|-----------|----------------|--------------------|
| Compound 35 | 475.24578 | 1.18    | 474.23875 | C26 H30 N6 O3 | 474.23794 | 1.71           | Find by Formula    |

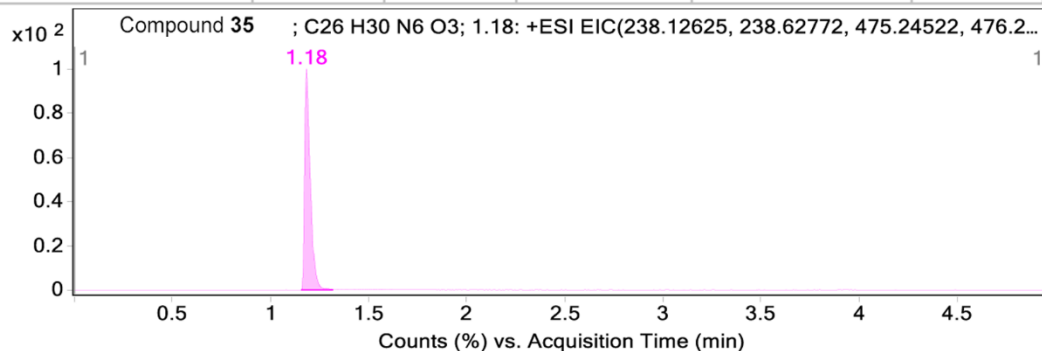

MS Zoomed Spectrum

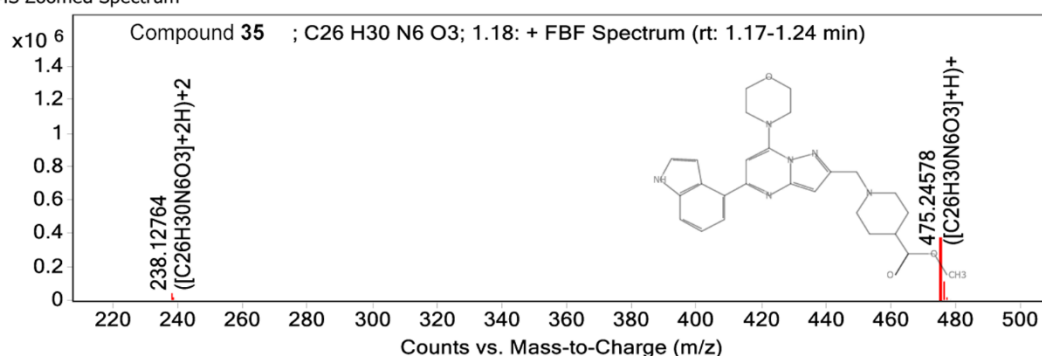

MS Zoomed Spectrum

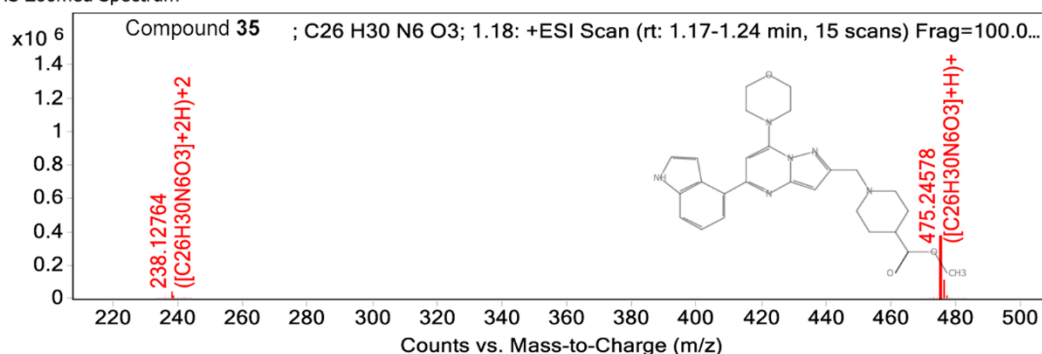

MS Spectrum Peak List

| Obs. m/z  | Charge | Abund     | Formula    | Ion/Isotope | Tgt Mass Error (ppm) |
|-----------|--------|-----------|------------|-------------|----------------------|
| 238.12764 | 2      | 39287.81  | C26H30N6O3 | (M+2H)+2    |                      |
| 238.62889 | 2      | 12270.96  | C26H30N6O3 | (M+2H)+2    |                      |
| 239.13084 | 2      | 1943.22   | C26H30N6O3 | (M+2H)+2    |                      |
| 239.62934 | 2      | 274.5     | C26H30N6O3 | (M+2H)+2    |                      |
| 475.24578 | 1      | 370502.28 | C26H30N6O3 | (M+H)+      |                      |
| 476.24896 | 1      | 106459.38 | C26H30N6O3 | (M+H)+      |                      |
| 477.25109 | 1      | 17094.23  | C26H30N6O3 | (M+H)+      |                      |
| 478.25404 | 1      | 2155.16   | C26H30N6O3 | (M+H)+      |                      |
| 238.12764 | 2      | 39287.81  | C26H30N6O3 | (M+2H)+2    | 5.87                 |
| 238.62889 | 2      | 12270.96  | C26H30N6O3 | (M+2H)+2    | 4.91                 |
| 239.13084 | 2      | 1943.22   | C26H30N6O3 | (M+2H)+2    | 7.36                 |
| 239.62934 | 2      | 274.5     | C26H30N6O3 | (M+2H)+2    | -4.42                |
| 475.24578 | 1      | 370502.28 | C26H30N6O3 | (M+H)+      | 1.19                 |
| 476.24896 | 1      | 106459.38 | C26H30N6O3 | (M+H)+      | 1.69                 |
| 477.25109 | 1      | 17094.23  | C26H30N6O3 | (M+H)+      | 0.41                 |
| 478.25404 | 1      | 2155.16   | C26H30N6O3 | (M+H)+      | 1.11                 |

--- End Of Report ---

# Compound 36

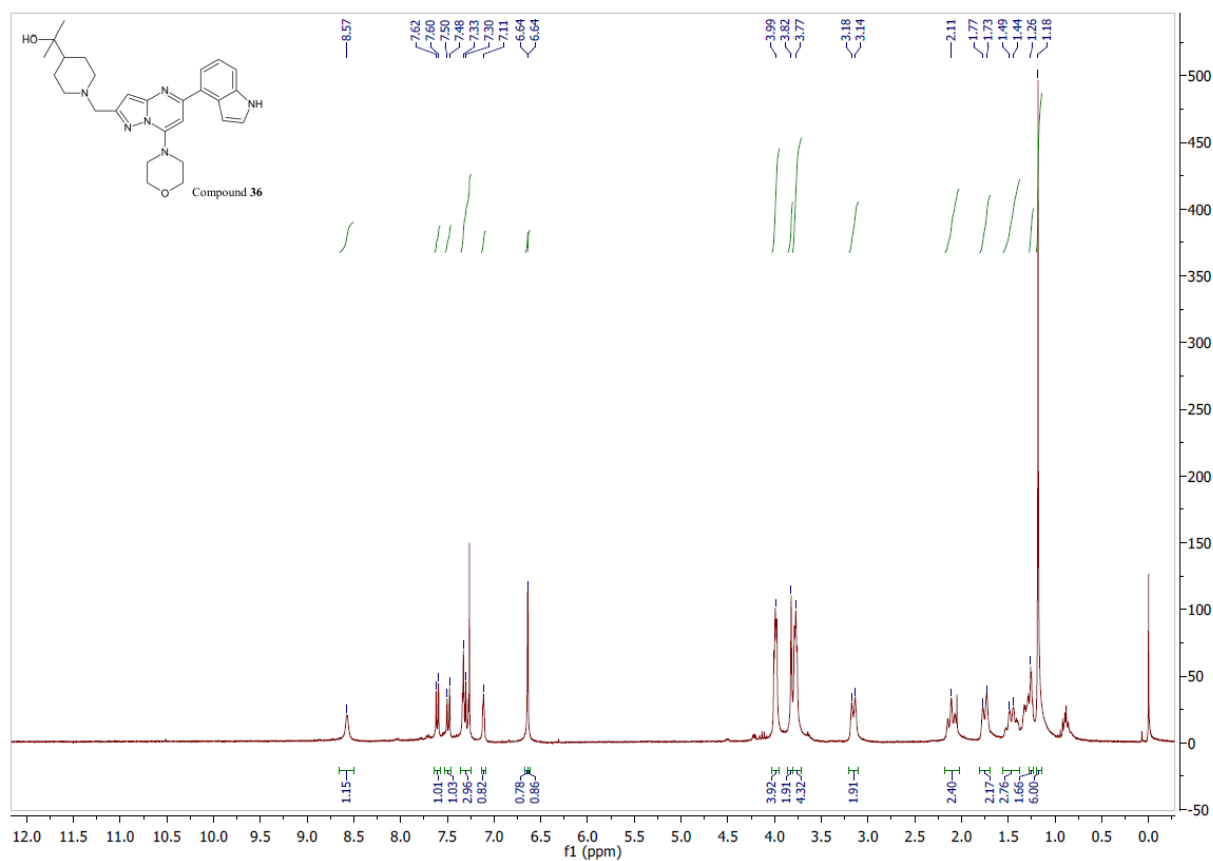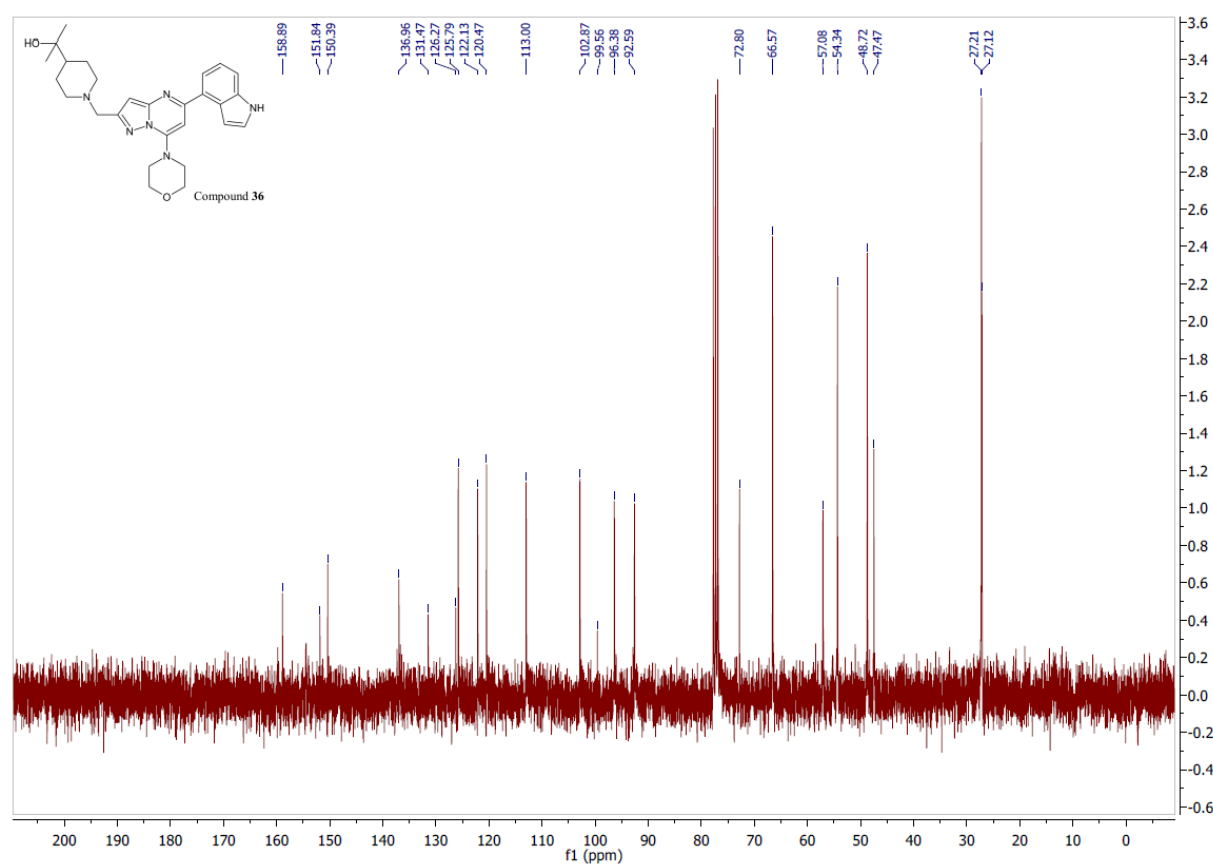

# Compound 36

| Name        | Obs. m/z | Obs. RT | Obs. Mass | Tgt Formula   | Tgt Mass | Tgt Mass Error | Find Cpds Algorith |
|-------------|----------|---------|-----------|---------------|----------|----------------|--------------------|
| Compound 36 | 475.2815 | 1.15    | 474.2752  | C27 H34 N6 O2 | 474.2743 | 1.85           | Find by Formula    |

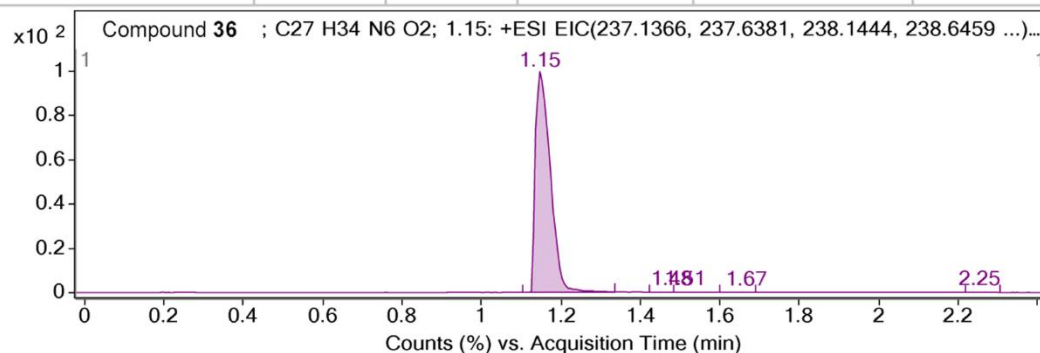

MS Zoomed Spectrum

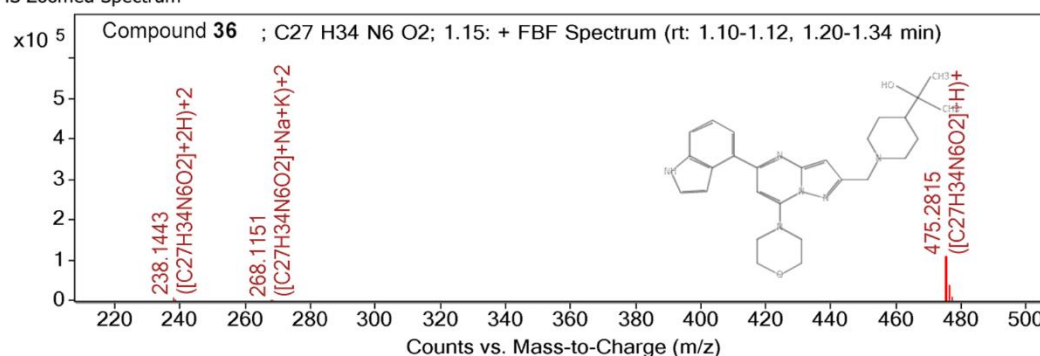

MS Zoomed Spectrum

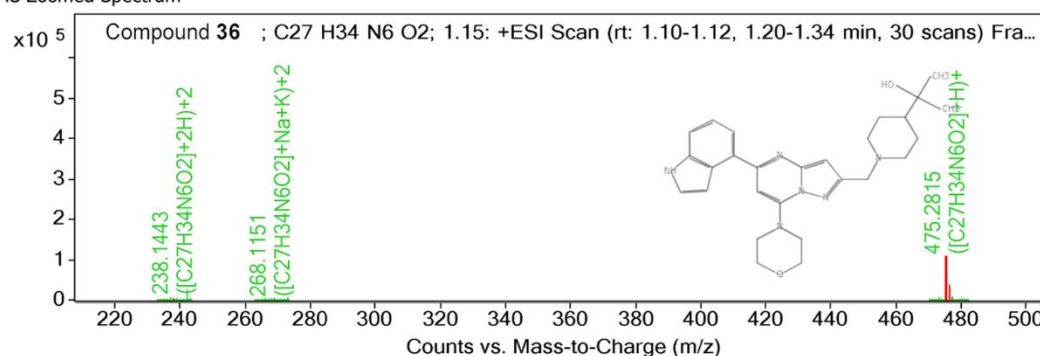

MS Spectrum Peak List

| Obs. m/z | Charge | Abund    | Formula    | Ion/Isotope | Tgt Mass Error (ppm) |
|----------|--------|----------|------------|-------------|----------------------|
| 238.1443 | 2      | 4850.05  | C27H34N6O2 | (M+2H)+2    |                      |
| 238.6462 | 2      | 1098.49  | C27H34N6O2 | (M+2H)+2    |                      |
| 268.1151 | 2      | 173.99   | C27H34N6O2 | (M+Na+K)+2  |                      |
| 268.6137 | 2      | 18.68    | C27H34N6O2 | (M+Na+K)+2  |                      |
| 475.2815 | 1      | 104772.1 | C27H34N6O2 | (M+H)+      |                      |
| 476.288  | 1      | 36473.09 | C27H34N6O2 | (M+H)+      |                      |
| 477.29   | 1      | 7399.36  | C27H34N6O2 | (M+H)+      |                      |
| 238.1443 | 2      | 4850.05  | C27H34N6O2 | (M+2H)+2    | -0.54                |
| 238.6462 | 2      | 1098.49  | C27H34N6O2 | (M+2H)+2    | 1.15                 |
| 268.1151 | 2      | 173.99   | C27H34N6O2 | (M+Na+K)+2  | 6.37                 |
| 268.6137 | 2      | 18.68    | C27H34N6O2 | (M+Na+K)+2  | -4.18                |
| 475.2815 | 1      | 104772.1 | C27H34N6O2 | (M+H)+      | -0.18                |
| 476.288  | 1      | 36473.09 | C27H34N6O2 | (M+H)+      | 7.21                 |
| 477.29   | 1      | 7399.36  | C27H34N6O2 | (M+H)+      | 5.4                  |

--- End Of Report ---

# Compound 37

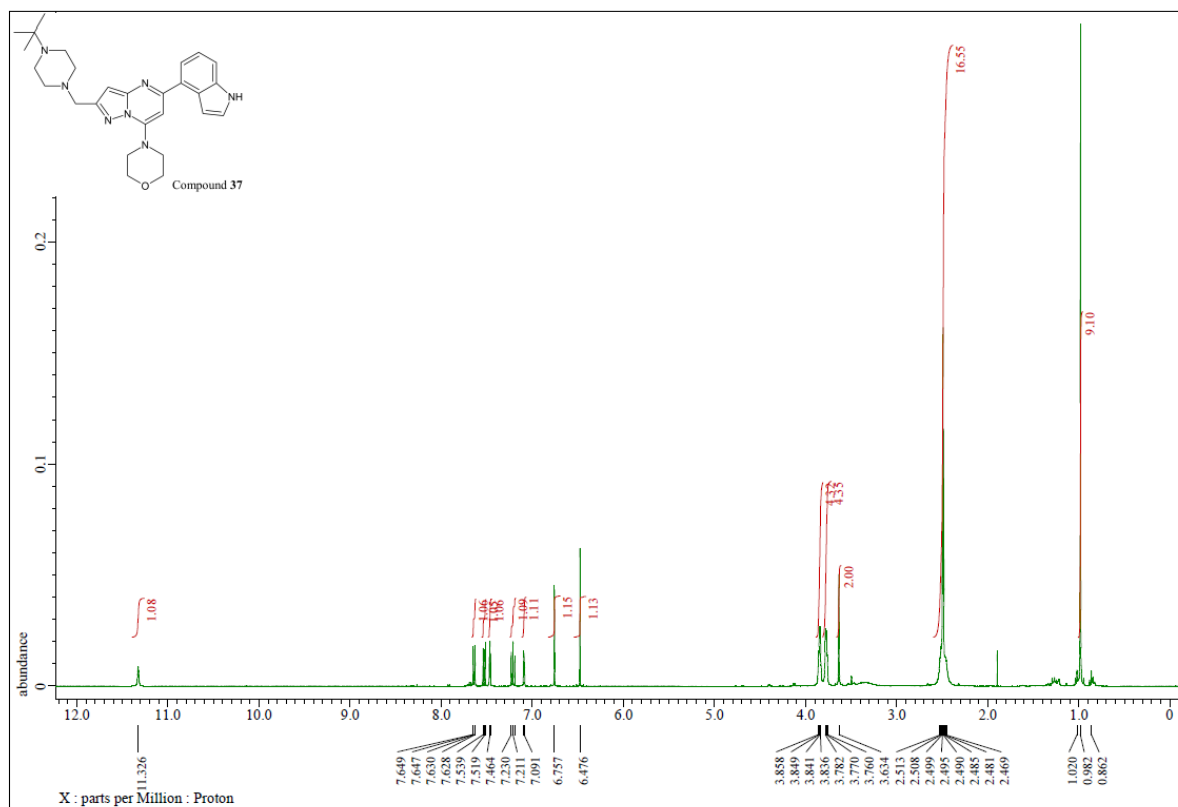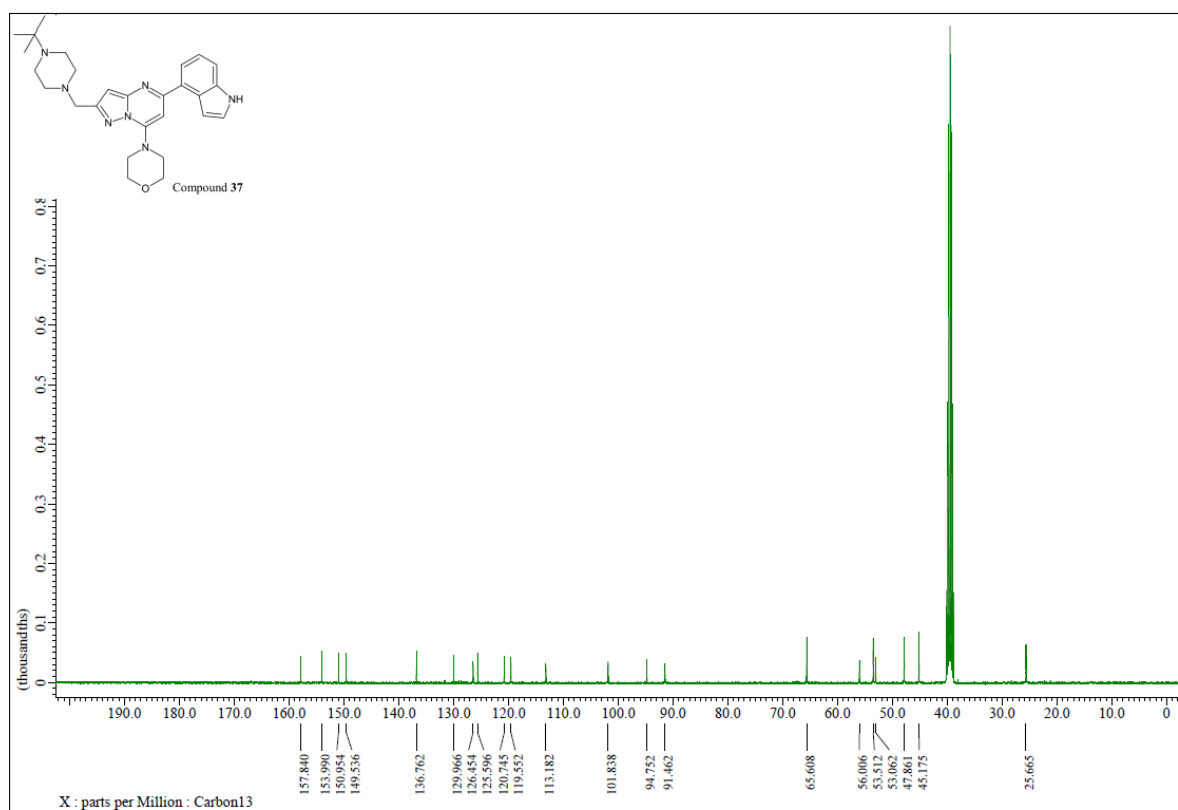



# Compound 37

| Name        | Obs. m/z | Obs. RT | Obs. Mass | Tgt Formula  | Tgt Mass | Tgt Mass Error | Find Cpd's Algorith |
|-------------|----------|---------|-----------|--------------|----------|----------------|---------------------|
| Compound 37 | 474.2976 | 1.12    | 473.2904  | C27 H35 N7 O | 473.2903 | 0.1            | Find by Formula     |

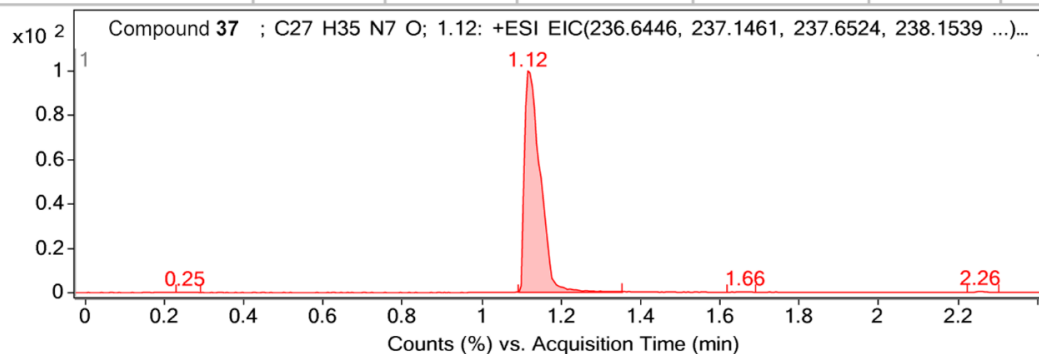

MS Zoomed Spectrum

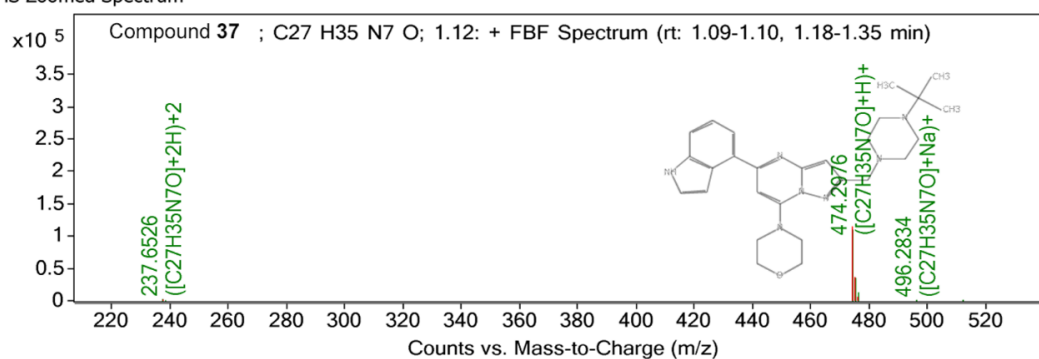

MS Zoomed Spectrum

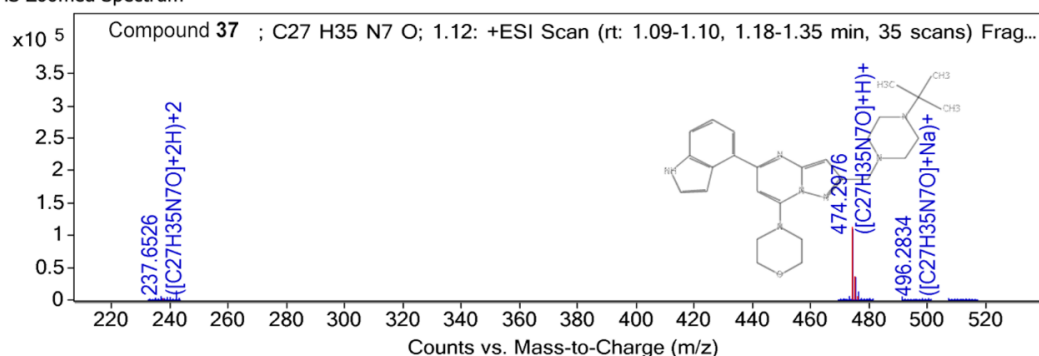

MS Spectrum Peak List

| Obs. m/z | Charge | Abund     | Formula   | Ion/Isotope | Tgt Mass Error (ppm) |
|----------|--------|-----------|-----------|-------------|----------------------|
| 237.6526 | 2      | 1976.24   | C27H35N7O | (M+2H)+2    |                      |
| 238.655  | 2      | 91.48     | C27H35N7O | (M+2H)+2    |                      |
| 474.2976 | 1      | 109334.64 | C27H35N7O | (M+H)+      |                      |
| 475.3002 | 1      | 34766.21  | C27H35N7O | (M+H)+      |                      |
| 476.3044 | 1      | 12225.21  | C27H35N7O | (M+H)+      |                      |
| 496.2834 | 1      | 461.95    | C27H35N7O | (M+Na)+     |                      |
| 512.2544 | 1      | 408.88    | C27H35N7O | (M+K)+      |                      |
| 237.6526 | 2      | 1976.24   | C27H35N7O | (M+2H)+2    | 0.59                 |
| 238.655  | 2      | 91.48     | C27H35N7O | (M+2H)+2    | -1                   |
| 474.2976 | 1      | 109334.64 | C27H35N7O | (M+H)+      | 0.02                 |
| 475.3002 | 1      | 34766.21  | C27H35N7O | (M+H)+      | -0.58                |
| 476.3044 | 1      | 12225.21  | C27H35N7O | (M+H)+      | 2.33                 |
| 496.2834 | 1      | 461.95    | C27H35N7O | (M+Na)+     | 7.8                  |
| 512.2544 | 1      | 408.88    | C27H35N7O | (M+K)+      | 1.88                 |

--- End Of Report ---

# Compound 38

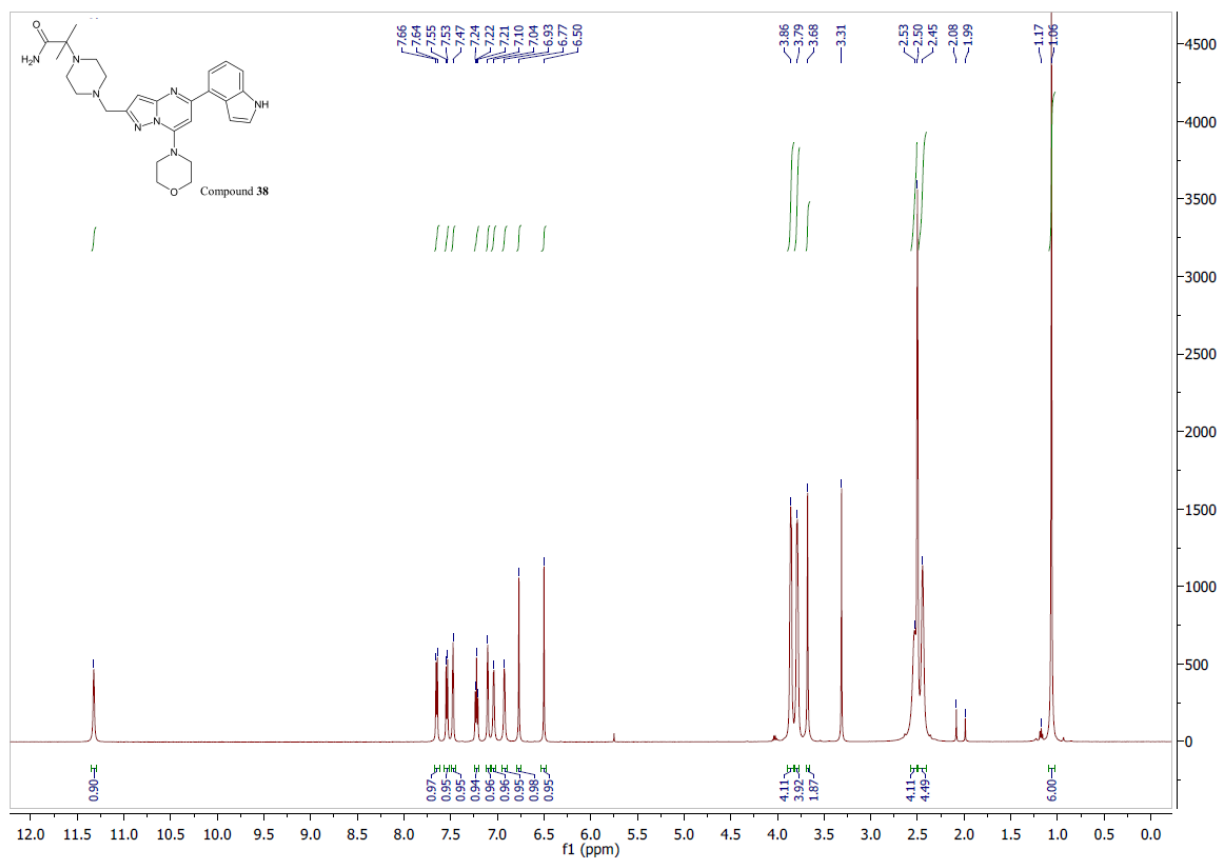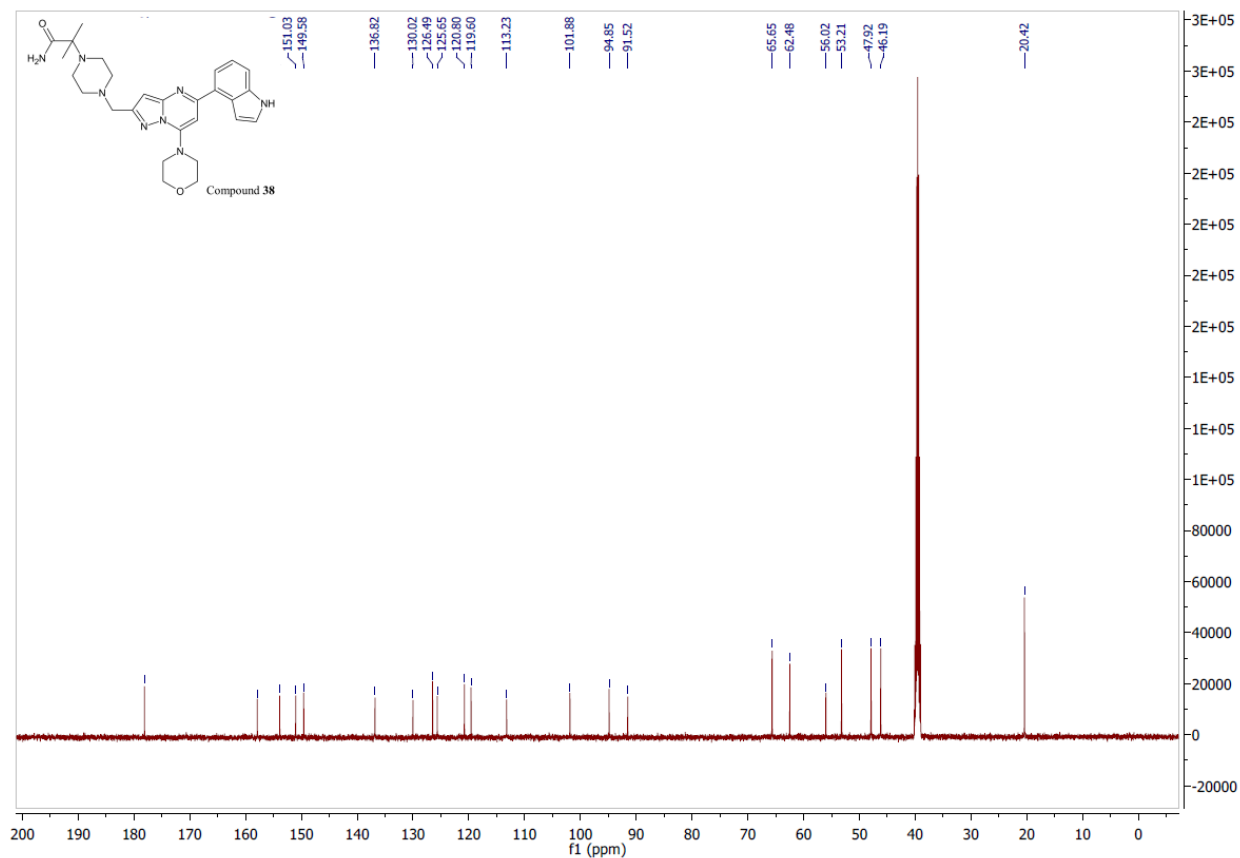

## Compound 38

| Name        | Obs. m/z | Obs. RT | Obs. Mass | Tgt Formula   | Tgt Mass | Tgt Mass Error | Find Cpds Alaoirith |
|-------------|----------|---------|-----------|---------------|----------|----------------|---------------------|
| Compound 38 | 525.2722 | 1.11    | 502.2828  | C27 H34 N8 O2 | 502.2805 | 4.69           | Find by Formula     |

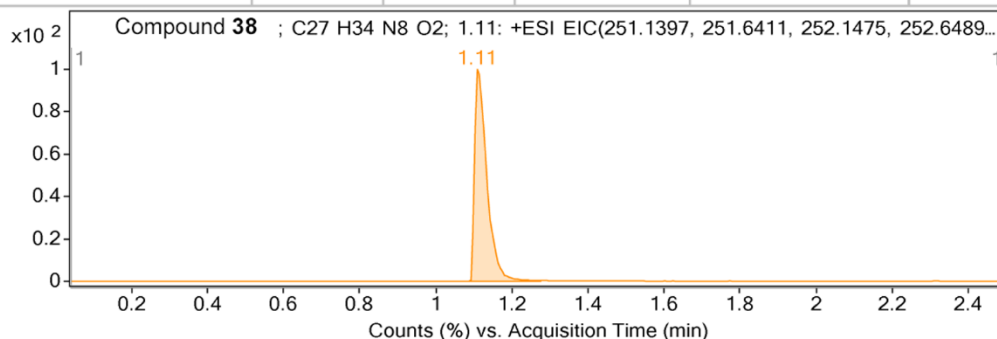

MS Zoomed Spectrum

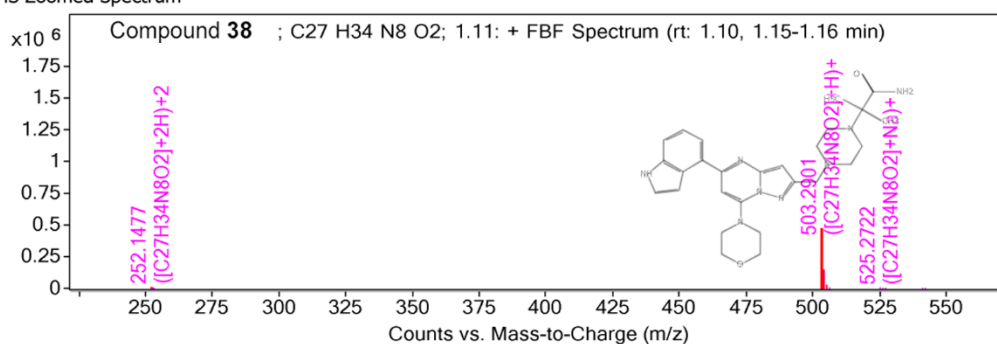

MS Zoomed Spectrum

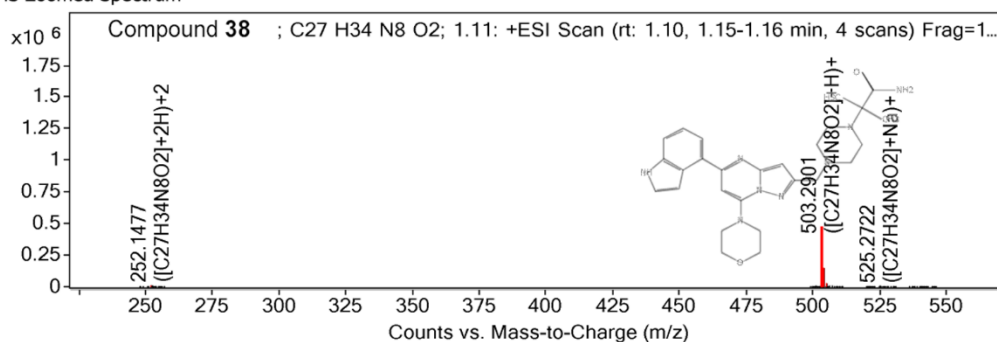

MS Spectrum Peak List

| Obs. m/z | Charge | Abund     | Formula    | Ion/Isotope | Tgt Mass Error (ppm) |
|----------|--------|-----------|------------|-------------|----------------------|
| 503.2901 | 1      | 469024.59 | C27H34N8O2 | (M+H)+      |                      |
| 503.2901 | 1      | 469024.59 | C27H34N8O2 | (M+H)+      | 4.59                 |

--- End Of Report ---

# Compound 39

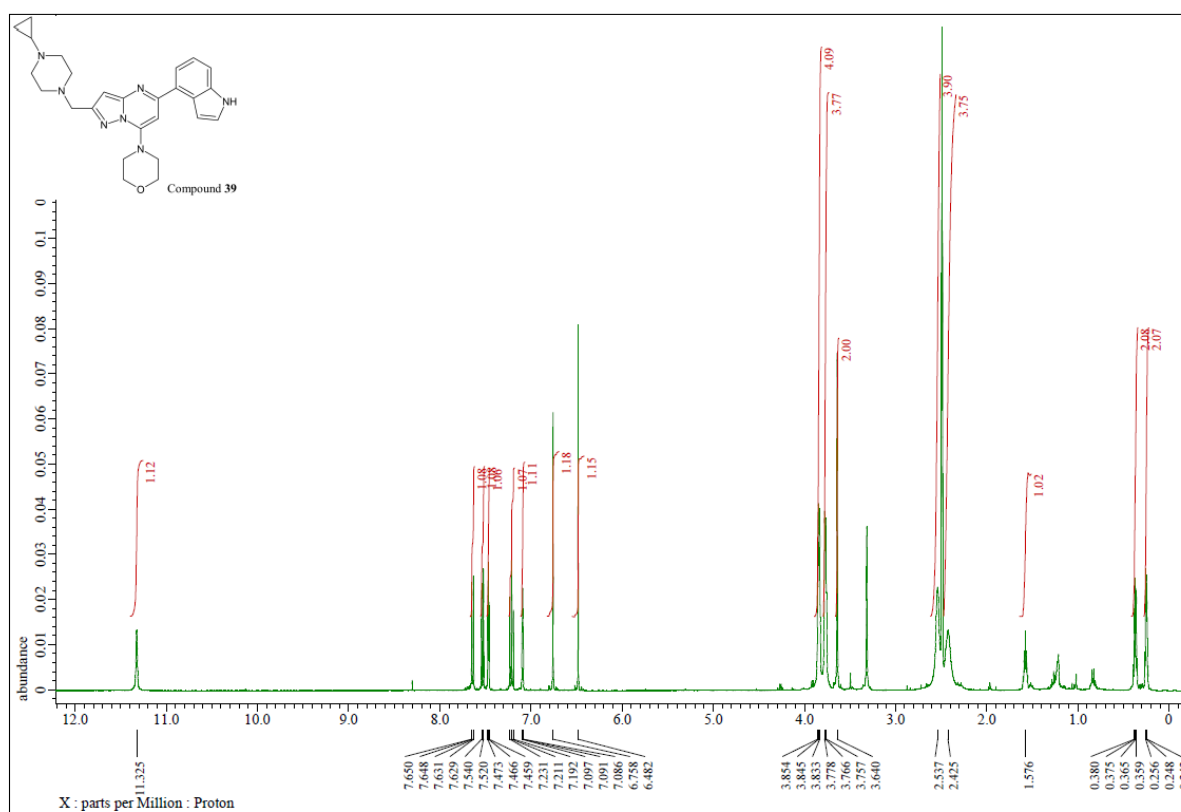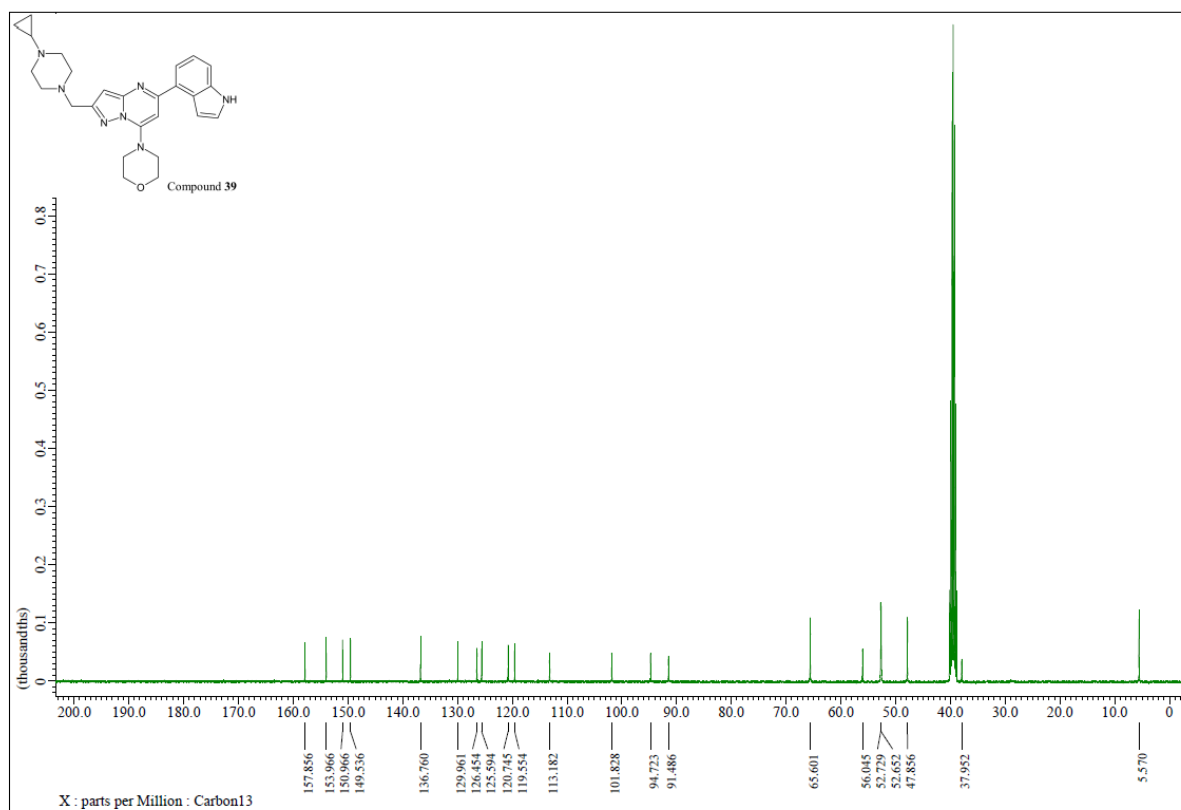

# Compound 39

| Name        | Obs. m/z  | Obs. RT | Obs. Mass | Tgt Formula  | Tgt Mass  | Tgt Mass Error | Find Cpds Algorith |
|-------------|-----------|---------|-----------|--------------|-----------|----------------|--------------------|
| Compound 39 | 458.26656 | 1.12    | 457.2599  | C26 H31 N7 O | 457.25901 | 1.94           | Find by Formula    |

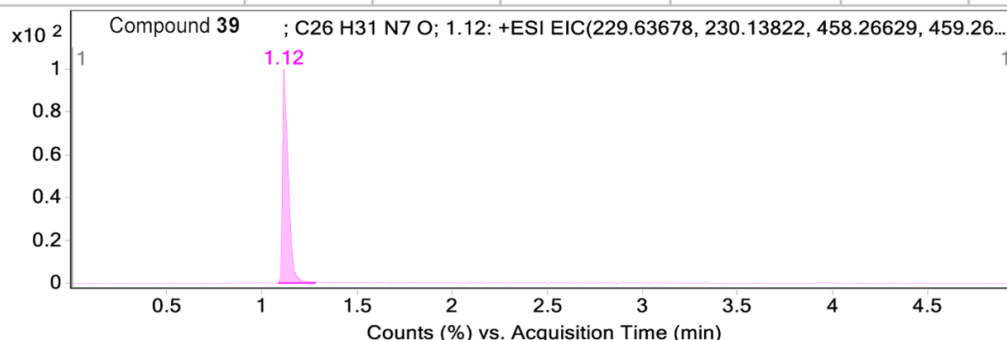

MS Zoomed Spectrum

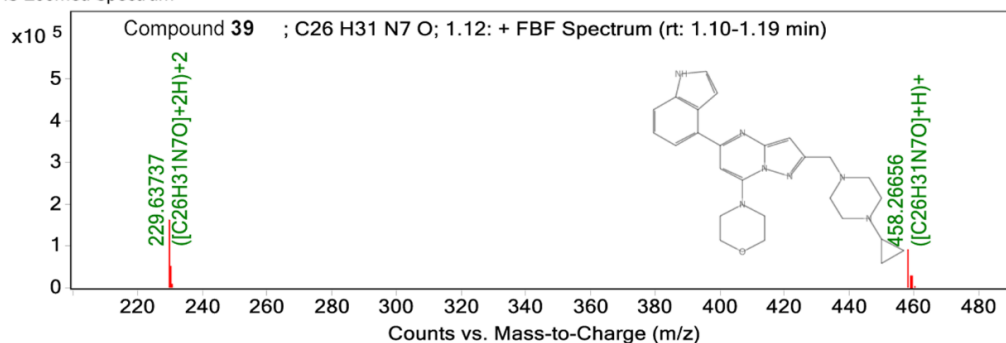

MS Zoomed Spectrum

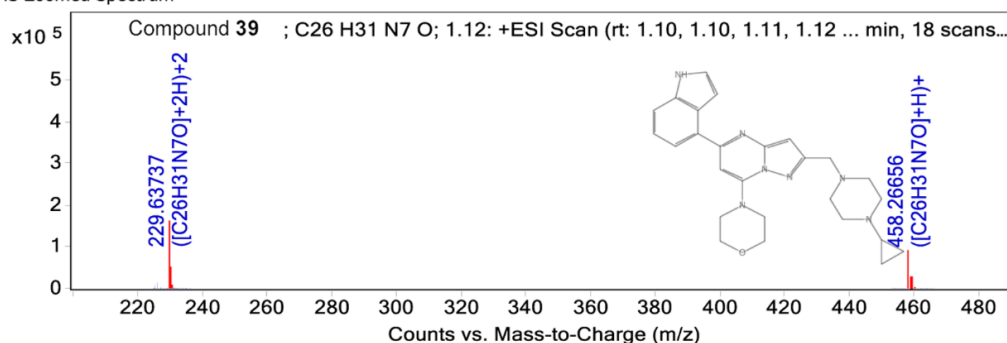

MS Spectrum Peak List

| Obs. m/z  | Charge | Abund     | Formula   | Ion/Isotope | Tgt Mass Error (ppm) |
|-----------|--------|-----------|-----------|-------------|----------------------|
| 229.63737 | 2      | 163876.17 | C26H31N7O | (M+2H)+2    |                      |
| 230.139   | 2      | 49603.69  | C26H31N7O | (M+2H)+2    |                      |
| 230.64031 | 2      | 7768.41   | C26H31N7O | (M+2H)+2    |                      |
| 231.13724 | 2      | 993.14    | C26H31N7O | (M+2H)+2    |                      |
| 458.26656 | 1      | 90851.98  | C26H31N7O | (M+H)+      |                      |
| 459.26935 | 1      | 28360.6   | C26H31N7O | (M+H)+      |                      |
| 460.27201 | 1      | 4396.89   | C26H31N7O | (M+H)+      |                      |
| 461.27623 | 1      | 511.48    | C26H31N7O | (M+H)+      |                      |
| 229.63737 | 2      | 163876.17 | C26H31N7O | (M+2H)+2    | 2.58                 |
| 230.139   | 2      | 49603.69  | C26H31N7O | (M+2H)+2    | 3.41                 |
| 230.64031 | 2      | 7768.41   | C26H31N7O | (M+2H)+2    | 3.05                 |
| 231.13724 | 2      | 993.14    | C26H31N7O | (M+2H)+2    | -16.14               |
| 458.26656 | 1      | 90851.98  | C26H31N7O | (M+H)+      | 0.6                  |
| 459.26935 | 1      | 28360.6   | C26H31N7O | (M+H)+      | 0.41                 |
| 460.27201 | 1      | 4396.89   | C26H31N7O | (M+H)+      | 0.14                 |
| 461.27623 | 1      | 511.48    | C26H31N7O | (M+H)+      | 3.4                  |

--- End Of Report ---

# Compound 40

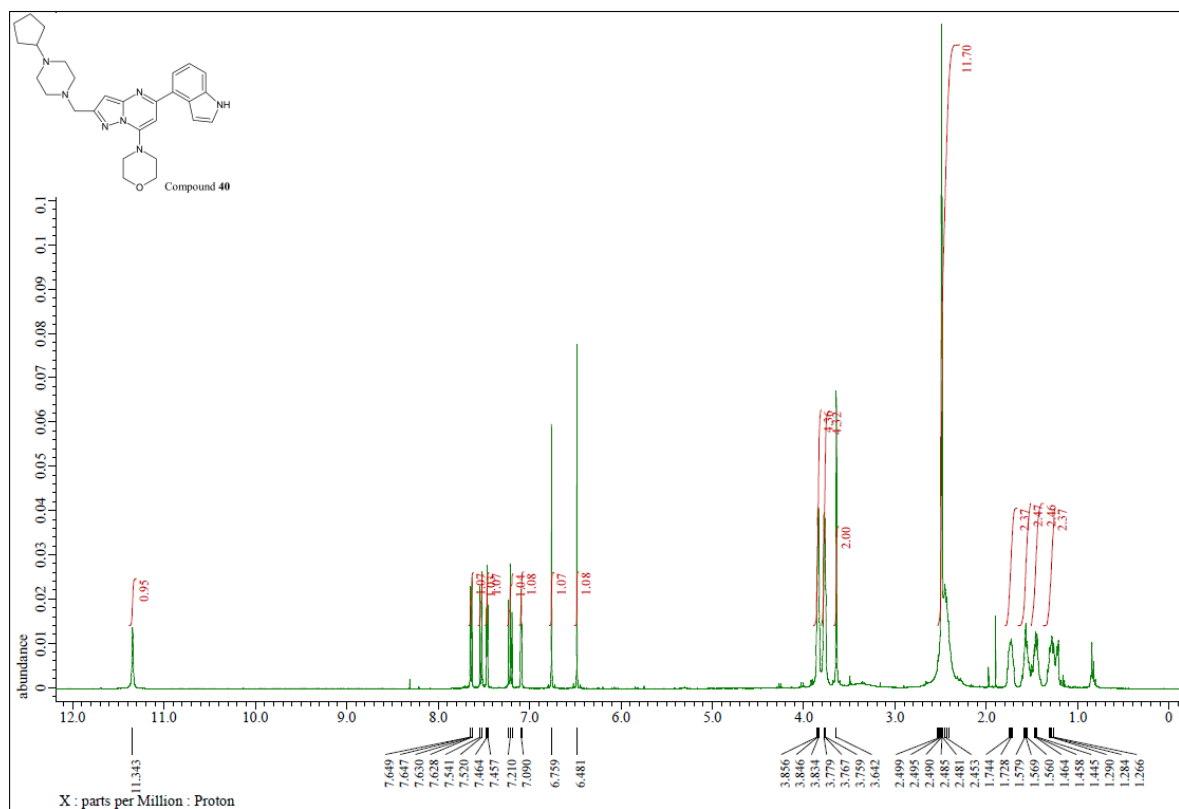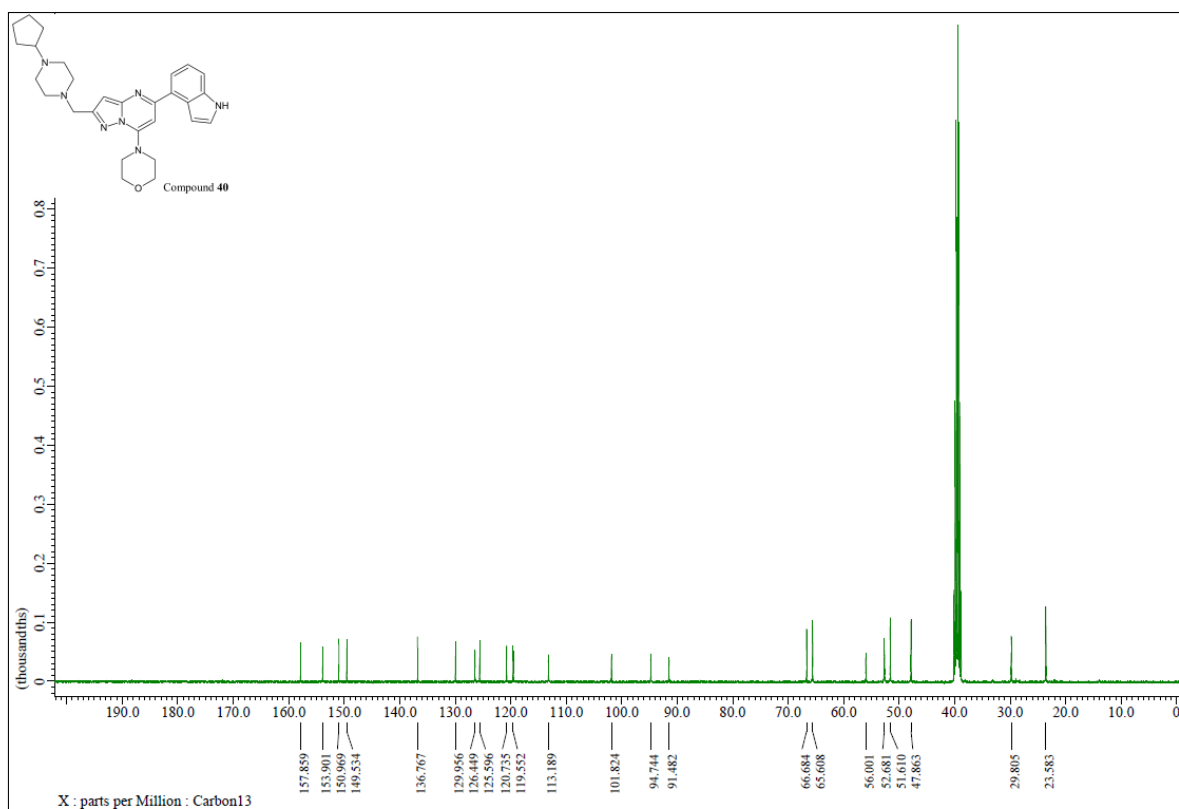

# Compound 40

| Name        | Obs. m/z  | Obs. RT | Obs. Mass | Tgt Formula  | Tgt Mass  | Tgt Mass Error | Find Cpds Algorith |
|-------------|-----------|---------|-----------|--------------|-----------|----------------|--------------------|
| Compound 40 | 486.29731 | 1.14    | 485.29115 | C28 H35 N7 O | 485.29031 | 1.73           | Find by Formula    |

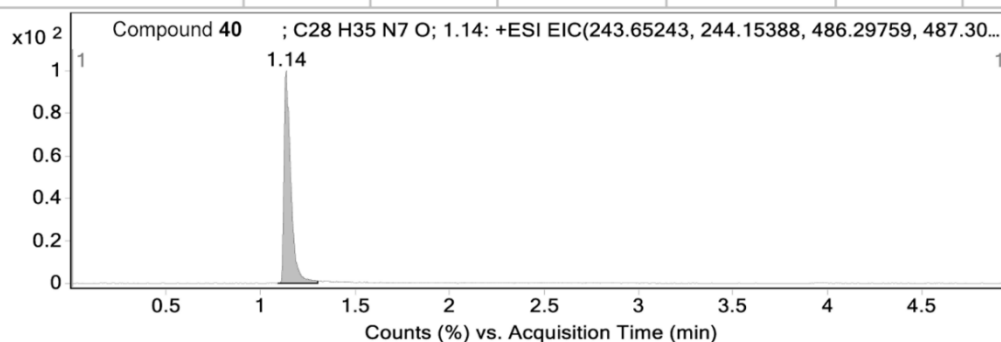

MS Zoomed Spectrum

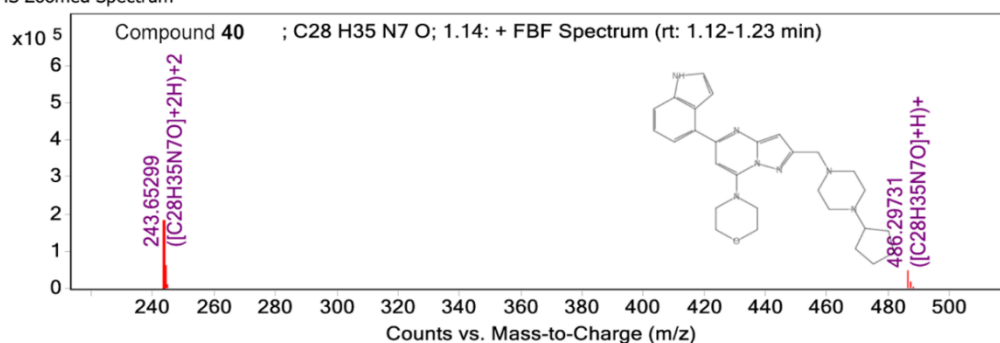

MS Zoomed Spectrum

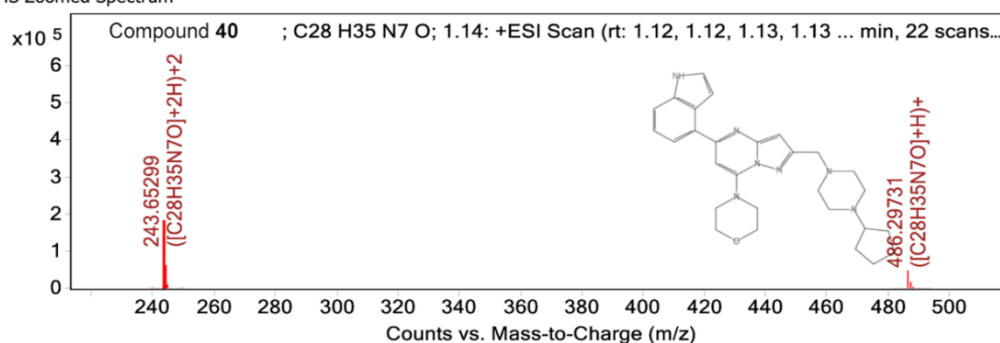

MS Spectrum Peak List

| Obs. m/z  | Charge | Abund     | Formula   | Ion/Isotope | Tgt Mass Error (ppm) |
|-----------|--------|-----------|-----------|-------------|----------------------|
| 243.65299 | 2      | 183132.14 | C28H35N7O | (M+2H)+2    |                      |
| 244.1546  | 2      | 57179.7   | C28H35N7O | (M+2H)+2    |                      |
| 244.65581 | 2      | 9451.18   | C28H35N7O | (M+2H)+2    |                      |
| 245.1542  | 2      | 1692.28   | C28H35N7O | (M+2H)+2    |                      |
| 486.29731 | 1      | 47318.36  | C28H35N7O | (M+H)+      |                      |
| 487.30016 | 1      | 15779.74  | C28H35N7O | (M+H)+      |                      |
| 488.30307 | 1      | 2791.22   | C28H35N7O | (M+H)+      |                      |
| 489.30436 | 1      | 349.8     | C28H35N7O | (M+H)+      |                      |
| 243.65299 | 2      | 183132.14 | C28H35N7O | (M+2H)+2    | 2.28                 |
| 244.1546  | 2      | 57179.7   | C28H35N7O | (M+2H)+2    | 2.95                 |
| 244.65581 | 2      | 9451.18   | C28H35N7O | (M+2H)+2    | 2.07                 |
| 245.1542  | 2      | 1692.28   | C28H35N7O | (M+2H)+2    | -10.14               |
| 486.29731 | 1      | 47318.36  | C28H35N7O | (M+H)+      | -0.57                |
| 487.30016 | 1      | 15779.74  | C28H35N7O | (M+H)+      | -0.68                |
| 488.30307 | 1      | 2791.22   | C28H35N7O | (M+H)+      | -0.53                |
| 489.30436 | 1      | 349.8     | C28H35N7O | (M+H)+      | -3.52                |

--- End Of Report ---

# Compound 41

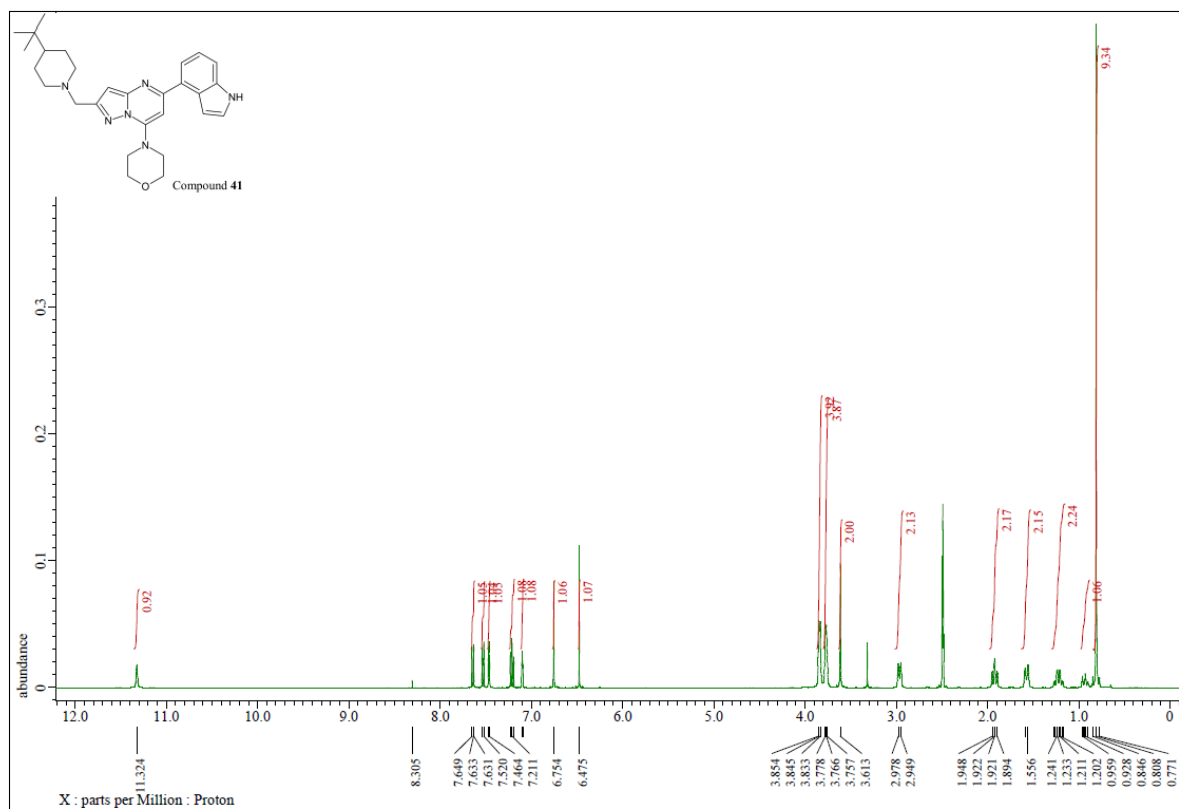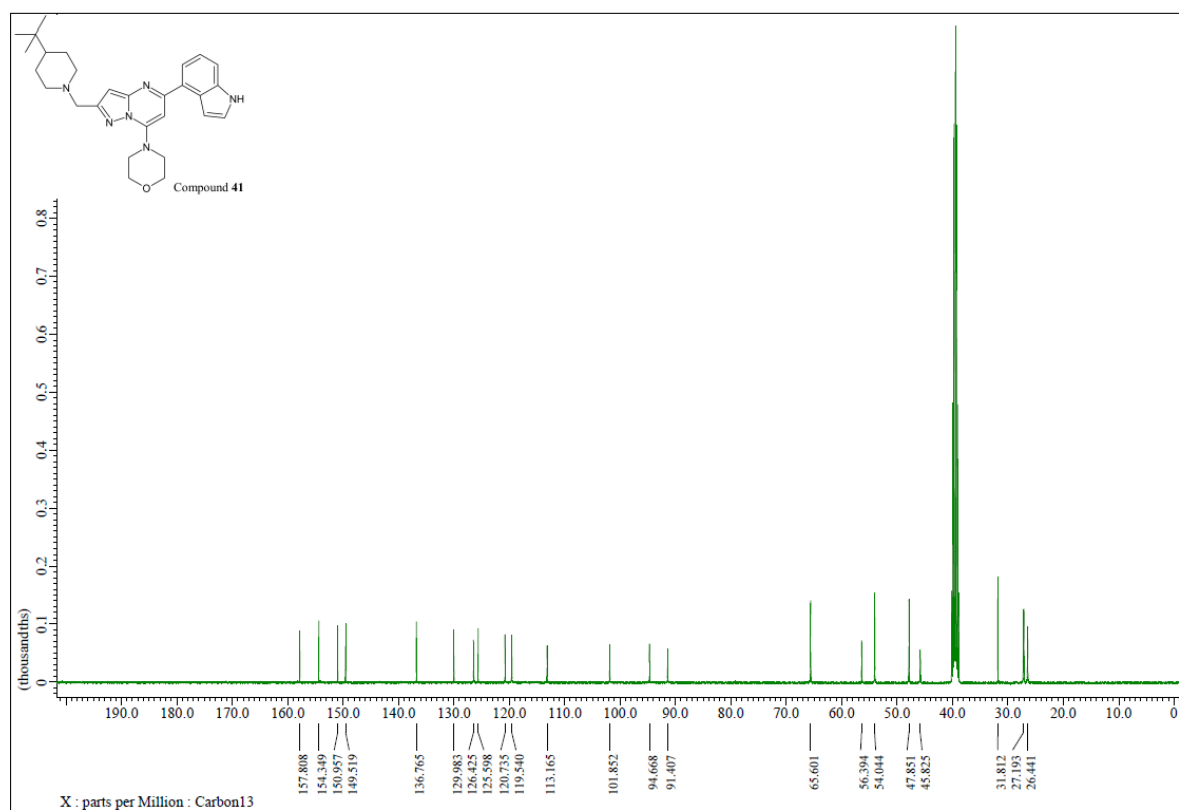



## Compound 41

| Name        | Obs. m/z  | Obs. RT | Obs. Mass | Tgt Formula  | Tgt Mass  | Tgt Mass Error | Find Cpds Algorith |
|-------------|-----------|---------|-----------|--------------|-----------|----------------|--------------------|
| Compound 41 | 237.15538 | 1.58    | 472.29562 | C28 H36 N6 O | 472.29506 | 1.18           | Find by Formula    |

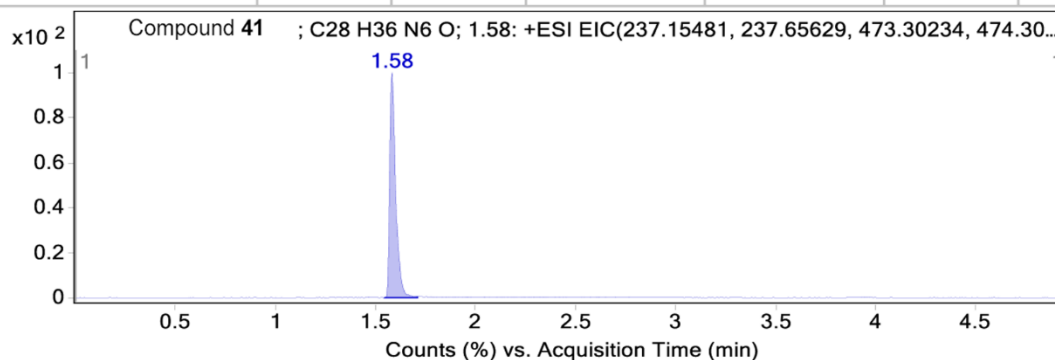

MS Zoomed Spectrum

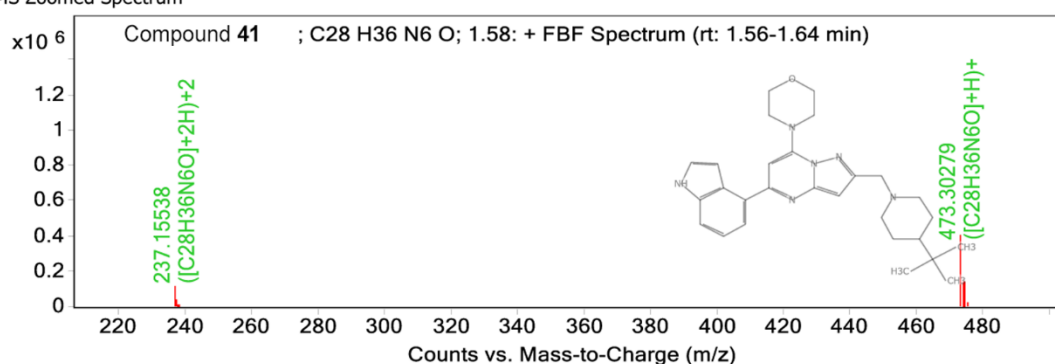

MS Zoomed Spectrum

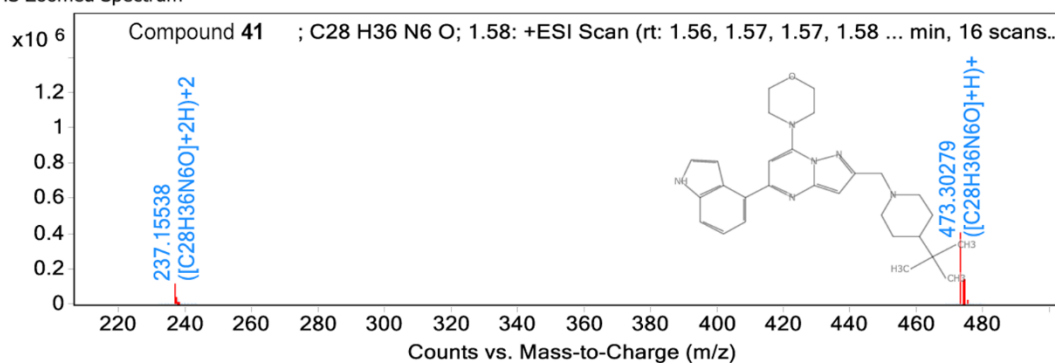

MS Spectrum Peak List

| Obs. m/z  | Charge | Abund     | Formula   | Ion/Isotope | Tgt Mass Error (ppm) |
|-----------|--------|-----------|-----------|-------------|----------------------|
| 237.15538 | 2      | 111387.02 | C28H36N6O | (M+2H)+2    |                      |
| 237.65676 | 2      | 36742.8   | C28H36N6O | (M+2H)+2    |                      |
| 238.15755 | 2      | 6752.31   | C28H36N6O | (M+2H)+2    |                      |
| 238.65771 | 2      | 829.94    | C28H36N6O | (M+2H)+2    |                      |
| 473.30279 | 1      | 407145.97 | C28H36N6O | (M+H)+      |                      |
| 474.30575 | 1      | 121042.59 | C28H36N6O | (M+H)+      |                      |
| 475.30801 | 1      | 19658.06  | C28H36N6O | (M+H)+      |                      |
| 237.15538 | 2      | 111387.02 | C28H36N6O | (M+2H)+2    | 2.42                 |
| 237.65676 | 2      | 36742.8   | C28H36N6O | (M+2H)+2    | 1.97                 |
| 238.15755 | 2      | 6752.31   | C28H36N6O | (M+2H)+2    | -0.8                 |
| 238.65771 | 2      | 829.94    | C28H36N6O | (M+2H)+2    | -6.03                |
| 473.30279 | 1      | 407145.97 | C28H36N6O | (M+H)+      | 0.96                 |
| 474.30575 | 1      | 121042.59 | C28H36N6O | (M+H)+      | 0.94                 |
| 475.30801 | 1      | 19658.06  | C28H36N6O | (M+H)+      | -0.41                |

--- End Of Report ---

# Compound 42

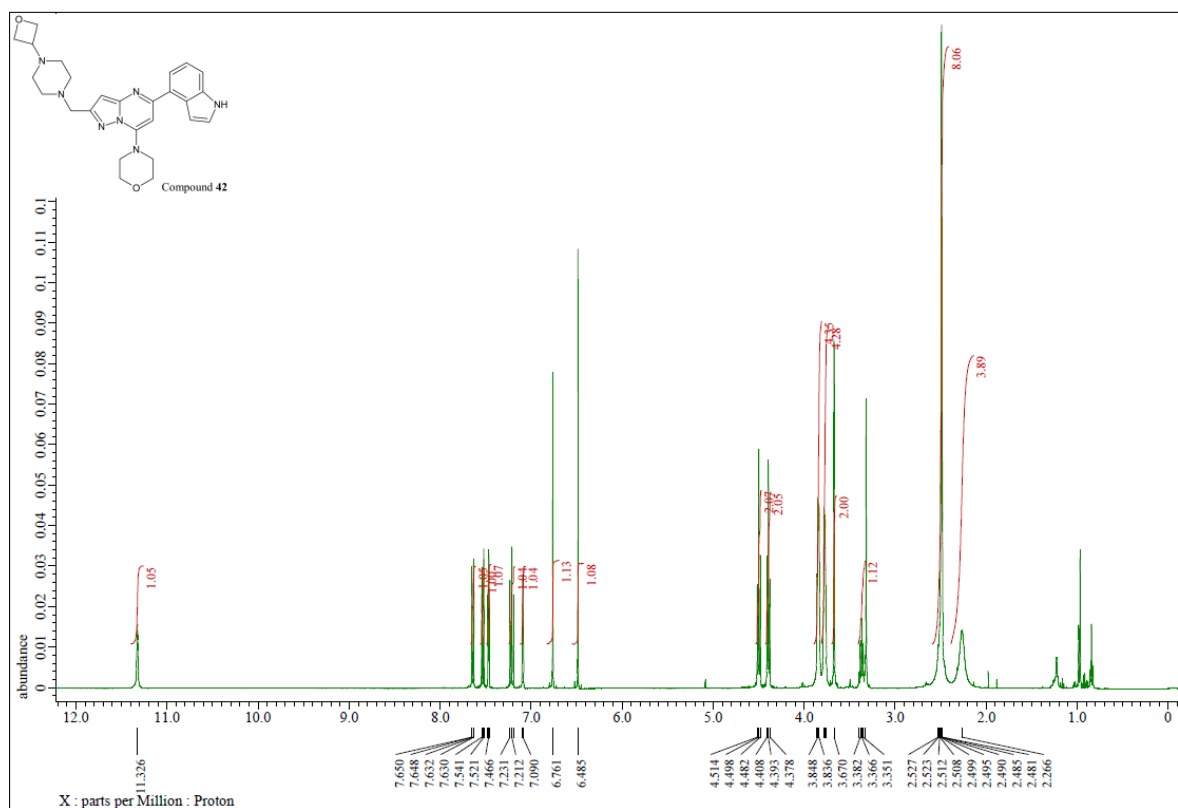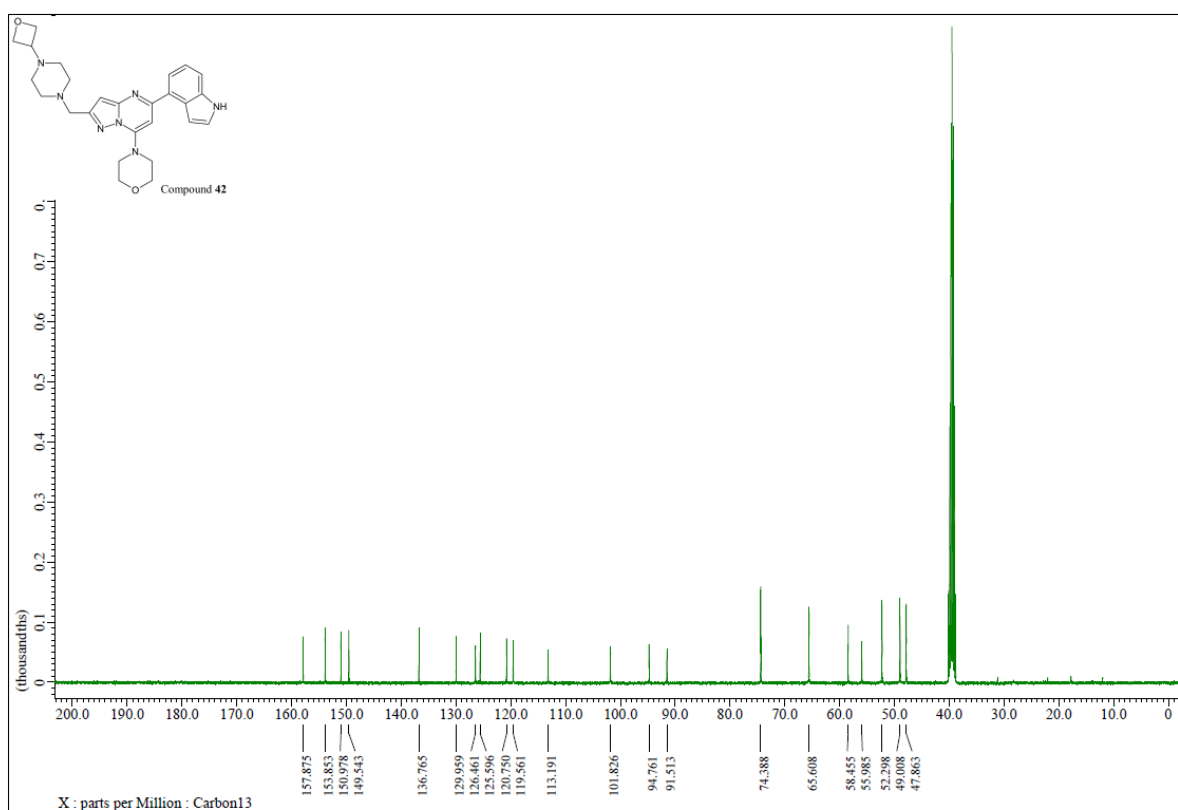

## Compound 42

| Name        | Obs. m/z | Obs. RT | Obs. Mass | Tgt Formula   | Tgt Mass  | Tgt Mass Error | Find Cpds Alaoirith |
|-------------|----------|---------|-----------|---------------|-----------|----------------|---------------------|
| Compound 42 | 474.2616 | 1.06    | 473.25456 | C26 H31 N7 O2 | 473.25392 | 1.35           | Find by Formula     |

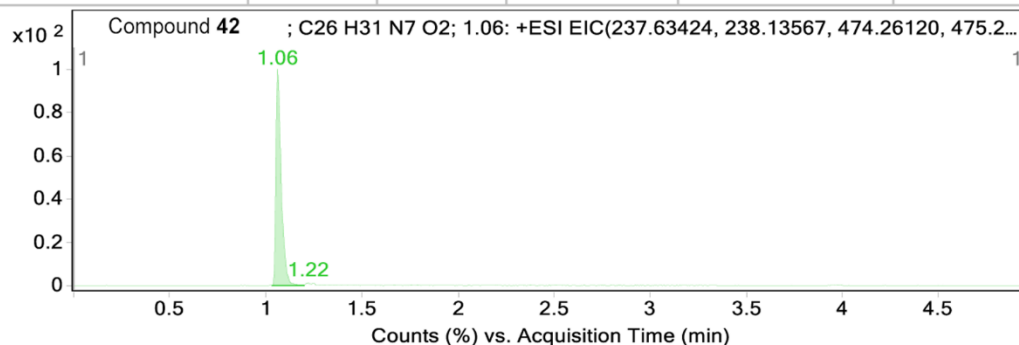

MS Zoomed Spectrum

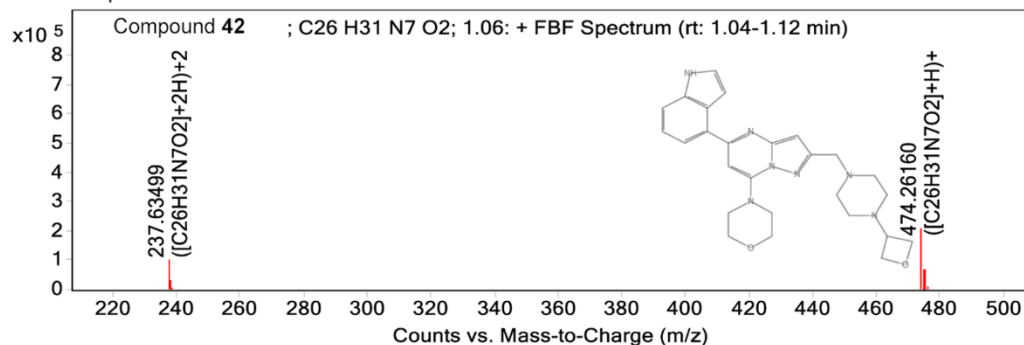

MS Zoomed Spectrum

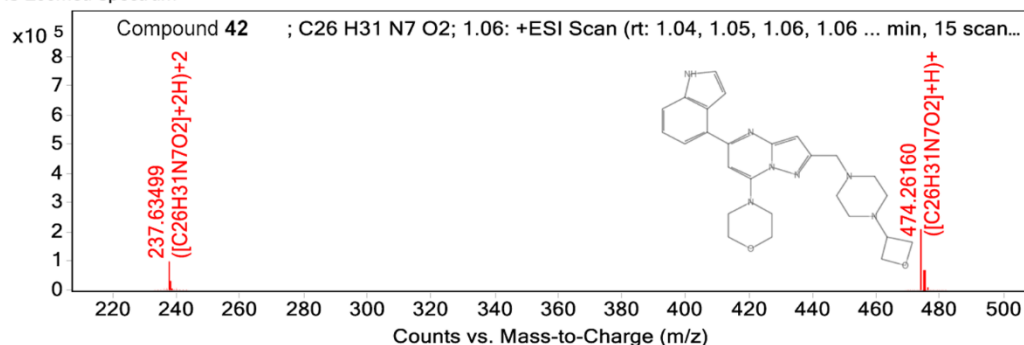

MS Spectrum Peak List

| Obs. m/z  | Charge | Abund     | Formula    | Ion/Isotope | Tgt Mass Error (ppm) |
|-----------|--------|-----------|------------|-------------|----------------------|
| 237.63499 | 2      | 99213.34  | C26H31N7O2 | (M+2H)+2    |                      |
| 238.13576 | 2      | 31857.8   | C26H31N7O2 | (M+2H)+2    |                      |
| 238.63738 | 2      | 4981.81   | C26H31N7O2 | (M+2H)+2    |                      |
| 474.2616  | 1      | 207817.77 | C26H31N7O2 | (M+H)+      |                      |
| 475.26443 | 1      | 63939.76  | C26H31N7O2 | (M+H)+      |                      |
| 476.267   | 1      | 9934.29   | C26H31N7O2 | (M+H)+      |                      |
| 477.27038 | 1      | 1159.53   | C26H31N7O2 | (M+H)+      |                      |
| 237.63499 | 2      | 99213.34  | C26H31N7O2 | (M+2H)+2    | 3.16                 |
| 238.13576 | 2      | 31857.8   | C26H31N7O2 | (M+2H)+2    | 0.35                 |
| 238.63738 | 2      | 4981.81   | C26H31N7O2 | (M+2H)+2    | 1.42                 |
| 474.2616  | 1      | 207817.77 | C26H31N7O2 | (M+H)+      | 0.84                 |
| 475.26443 | 1      | 63939.76  | C26H31N7O2 | (M+H)+      | 0.75                 |
| 476.267   | 1      | 9934.29   | C26H31N7O2 | (M+H)+      | 0.42                 |
| 477.27038 | 1      | 1159.53   | C26H31N7O2 | (M+H)+      | 1.96                 |

--- End Of Report ---

# Compound 43

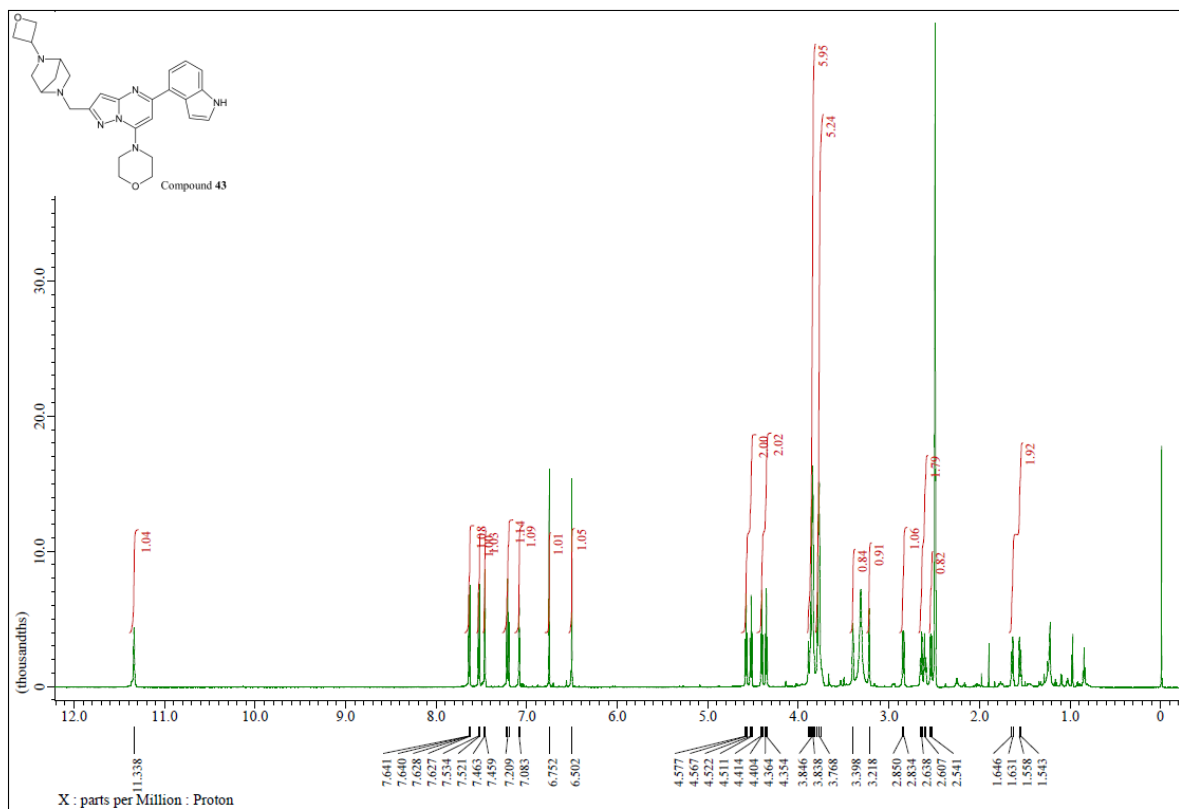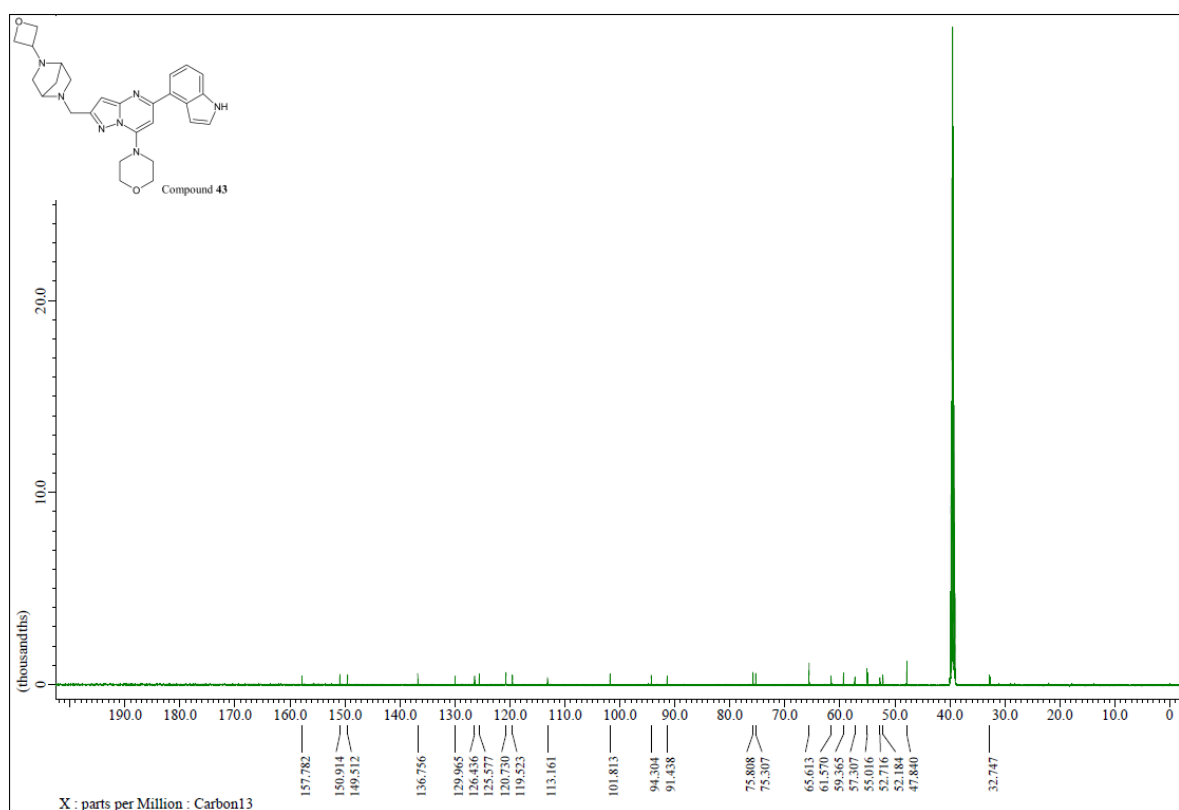

# Compound 43

| Name        | Obs. m/z  | Obs. RT | Obs. Mass | Tgt Formula   | Tgt Mass  | Tgt Mass Error | Find Cpds Algorith |
|-------------|-----------|---------|-----------|---------------|-----------|----------------|--------------------|
| Compound 43 | 486.26135 | 1.05    | 485.25477 | C27 H31 N7 O2 | 485.25392 | 1.74           | Find by Formula    |

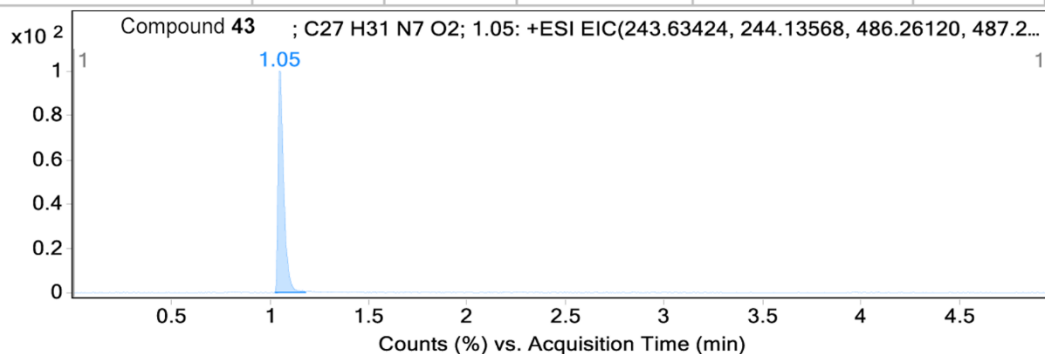

MS Zoomed Spectrum

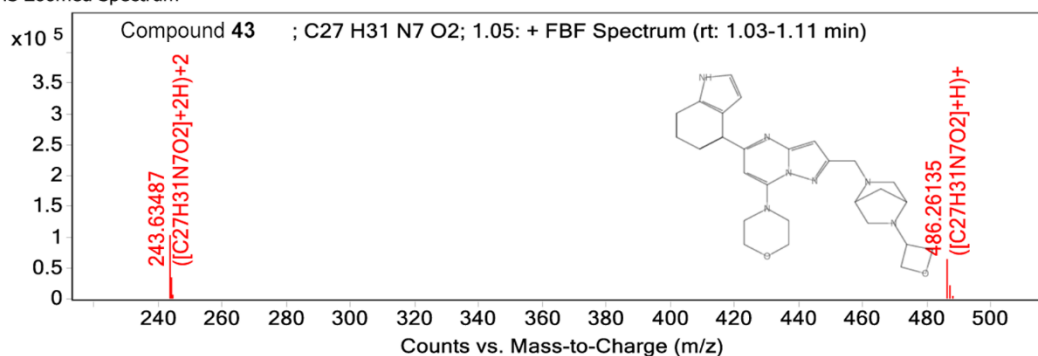

MS Zoomed Spectrum

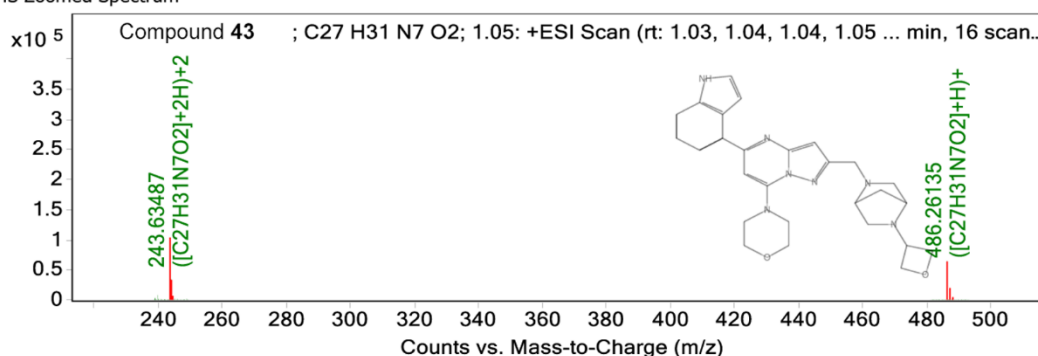

MS Spectrum Peak List

| Obs. m/z  | Charge | Abund     | Formula    | Ion/Isotope | Tgt Mass Error (ppm) |
|-----------|--------|-----------|------------|-------------|----------------------|
| 243.63487 | 2      | 102960.16 | C27H31N7O2 | (M+2H)+2    |                      |
| 244.13647 | 2      | 34634.86  | C27H31N7O2 | (M+2H)+2    |                      |
| 244.63749 | 2      | 5934.04   | C27H31N7O2 | (M+2H)+2    |                      |
| 486.26135 | 1      | 64416.76  | C27H31N7O2 | (M+H)+      |                      |
| 487.26383 | 1      | 19490.92  | C27H31N7O2 | (M+H)+      |                      |
| 488.2669  | 1      | 3146.05   | C27H31N7O2 | (M+H)+      |                      |
| 243.63487 | 2      | 102960.16 | C27H31N7O2 | (M+2H)+2    | 2.6                  |
| 244.13647 | 2      | 34634.86  | C27H31N7O2 | (M+2H)+2    | 3.23                 |
| 244.63749 | 2      | 5934.04   | C27H31N7O2 | (M+2H)+2    | 1.75                 |
| 486.26135 | 1      | 64416.76  | C27H31N7O2 | (M+H)+      | 0.31                 |
| 487.26383 | 1      | 19490.92  | C27H31N7O2 | (M+H)+      | -0.53                |
| 488.2669  | 1      | 3146.05   | C27H31N7O2 | (M+H)+      | 0.12                 |

--- End Of Report ---

# Compound 44

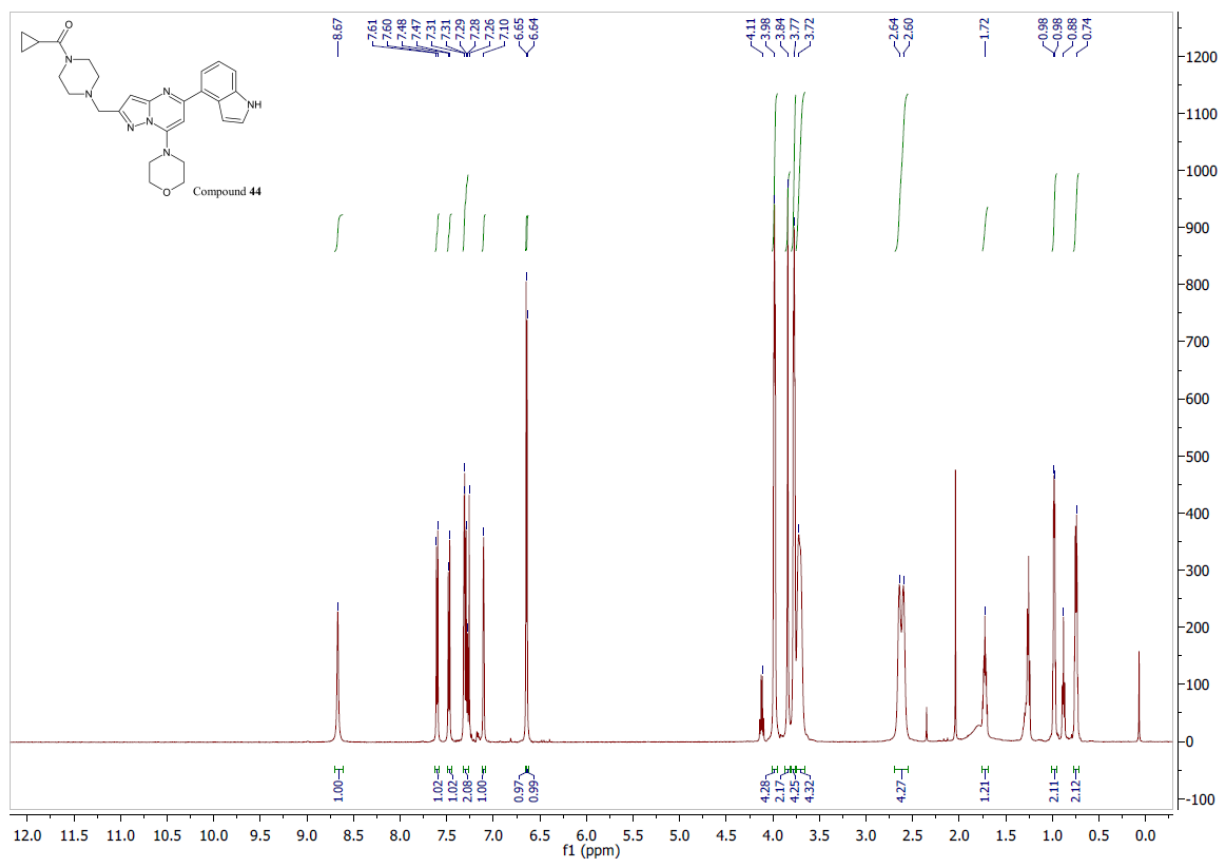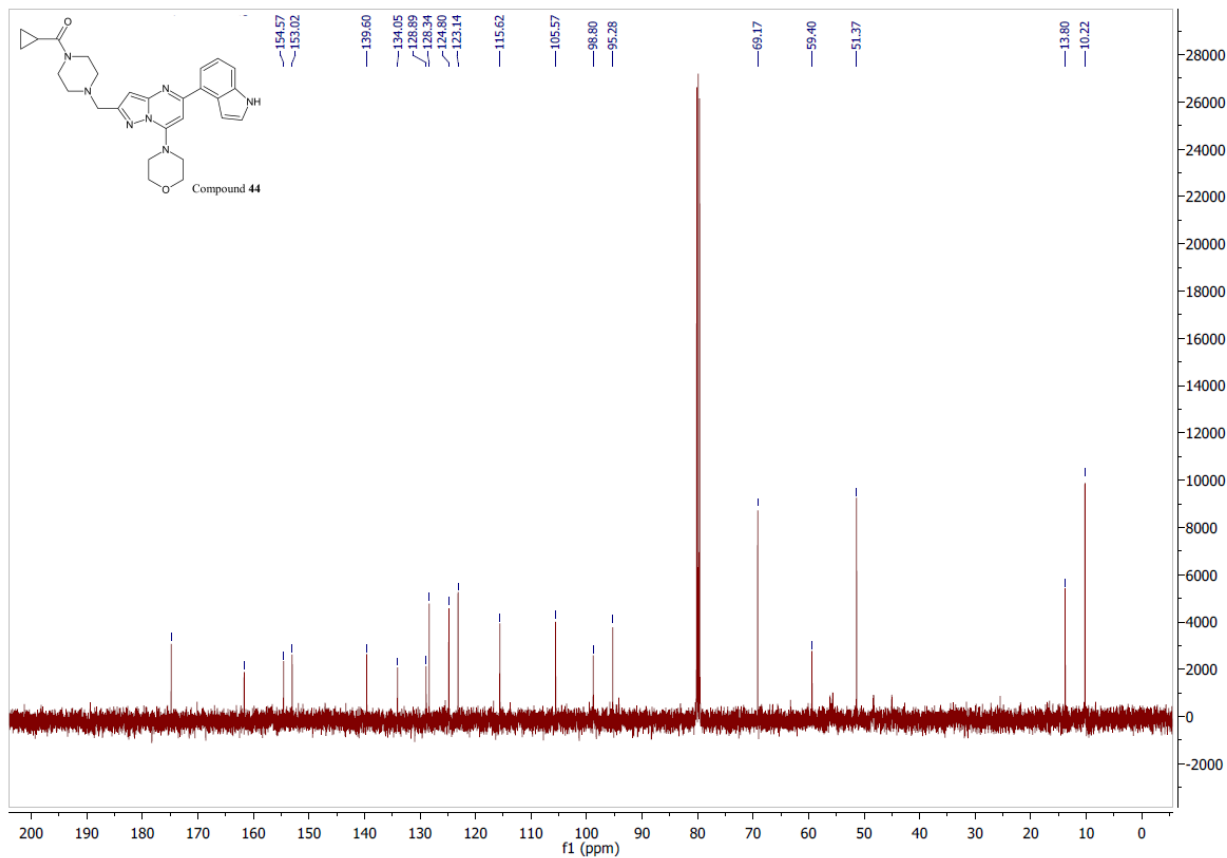

## Compound 44

| Compound Label | Name        | m/z      | RT  | Algorithm       | Mass      |
|----------------|-------------|----------|-----|-----------------|-----------|
| Compound 44    | Compound 44 | 243.6344 | 1.3 | Find by Formula | 485.25457 |

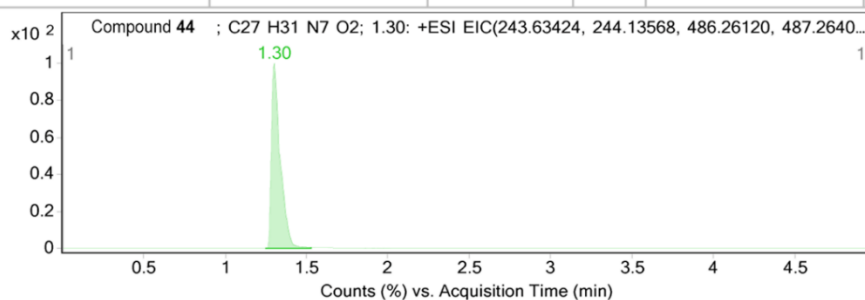

MS Zoomed Spectrum

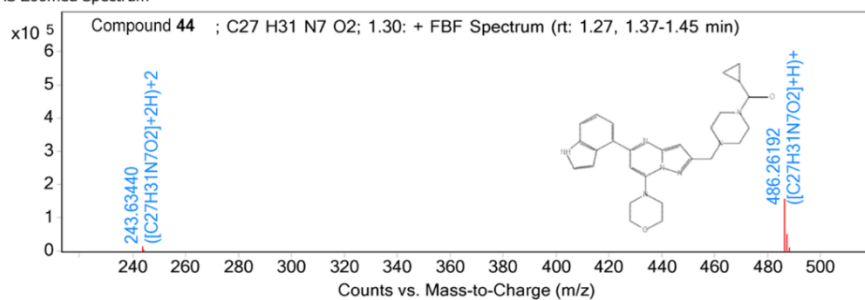

MS Spectrum Peak List

| m/z       | z | Abund     | Formula                                                       | Ion                  |
|-----------|---|-----------|---------------------------------------------------------------|----------------------|
| 243.6344  | 2 | 12024.05  | C <sub>27</sub> H <sub>31</sub> N <sub>7</sub> O <sub>2</sub> | (M+2H) <sup>2+</sup> |
| 244.13608 | 2 | 3727.14   | C <sub>27</sub> H <sub>31</sub> N <sub>7</sub> O <sub>2</sub> | (M+2H) <sup>2+</sup> |
| 244.63743 | 2 | 671.81    | C <sub>27</sub> H <sub>31</sub> N <sub>7</sub> O <sub>2</sub> | (M+2H) <sup>2+</sup> |
| 486.26192 | 1 | 156276.28 | C <sub>27</sub> H <sub>31</sub> N <sub>7</sub> O <sub>2</sub> | (M+H) <sup>+</sup>   |
| 487.26456 | 1 | 46874.78  | C <sub>27</sub> H <sub>31</sub> N <sub>7</sub> O <sub>2</sub> | (M+H) <sup>+</sup>   |
| 488.26754 | 1 | 7930.26   | C <sub>27</sub> H <sub>31</sub> N <sub>7</sub> O <sub>2</sub> | (M+H) <sup>+</sup>   |

MS Spectrum

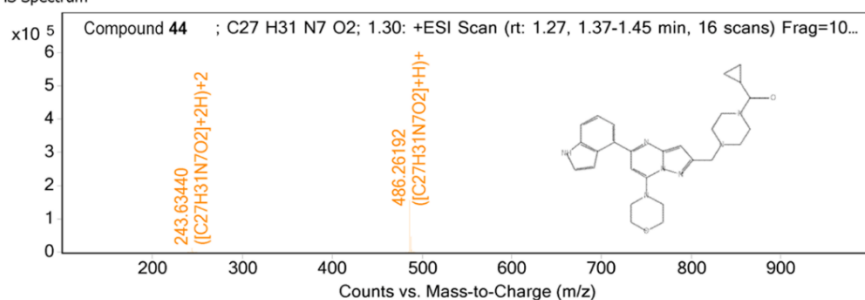

MS Zoomed Spectrum

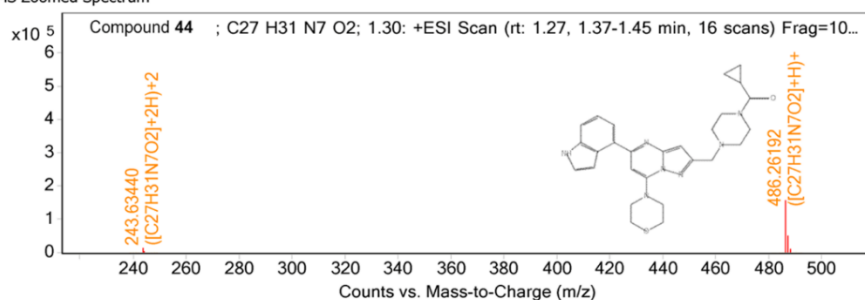

MS Spectrum Peak List

| m/z       | Calc m/z  | Diff(ppm) | z | Abund     | Formula                                                       | Ion                  |
|-----------|-----------|-----------|---|-----------|---------------------------------------------------------------|----------------------|
| 243.6344  | 243.63424 | 0.68      | 2 | 12024.05  | C <sub>27</sub> H <sub>31</sub> N <sub>7</sub> O <sub>2</sub> | (M+2H) <sup>2+</sup> |
| 244.13608 | 244.13568 | 1.62      | 2 | 3727.14   | C <sub>27</sub> H <sub>31</sub> N <sub>7</sub> O <sub>2</sub> | (M+2H) <sup>2+</sup> |
| 244.63743 | 244.63706 | 1.52      | 2 | 671.81    | C <sub>27</sub> H <sub>31</sub> N <sub>7</sub> O <sub>2</sub> | (M+2H) <sup>2+</sup> |
| 486.26192 | 486.2612  | 1.49      | 1 | 156276.28 | C <sub>27</sub> H <sub>31</sub> N <sub>7</sub> O <sub>2</sub> | (M+H) <sup>+</sup>   |
| 487.26456 | 487.26409 | 0.97      | 1 | 46874.78  | C <sub>27</sub> H <sub>31</sub> N <sub>7</sub> O <sub>2</sub> | (M+H) <sup>+</sup>   |
| 488.26754 | 488.26684 | 1.43      | 1 | 7930.26   | C <sub>27</sub> H <sub>31</sub> N <sub>7</sub> O <sub>2</sub> | (M+H) <sup>+</sup>   |

--- End Of Report ---

# Compound 49

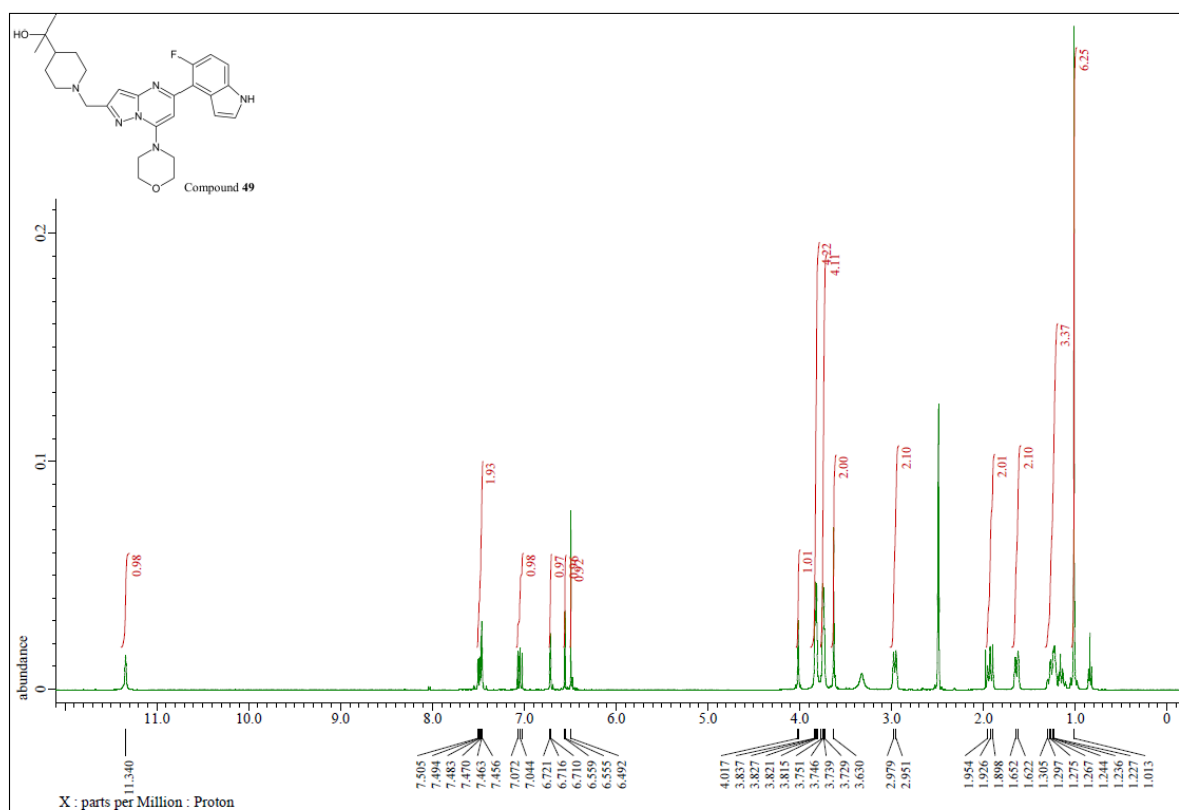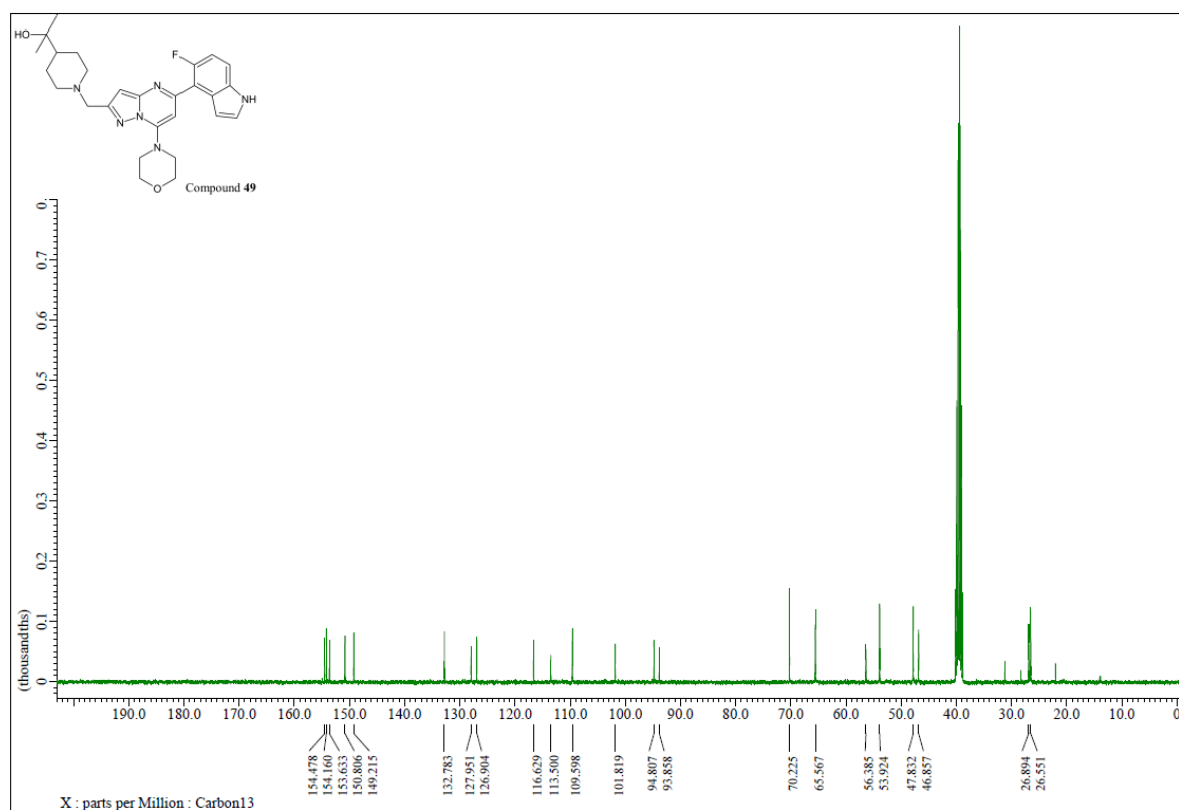



# Compound 49

| Name        | Obs. m/z  | Obs. RT | Obs. Mass | Tgt Formula     | Tgt Mass | Tgt Mass Error | Find Cpd's Alao rit |
|-------------|-----------|---------|-----------|-----------------|----------|----------------|---------------------|
| Compound 49 | 493.27235 | 1.23    | 492.26532 | C27 H33 F N6 O2 | 492.2649 | 0.86           | Find by Formula     |

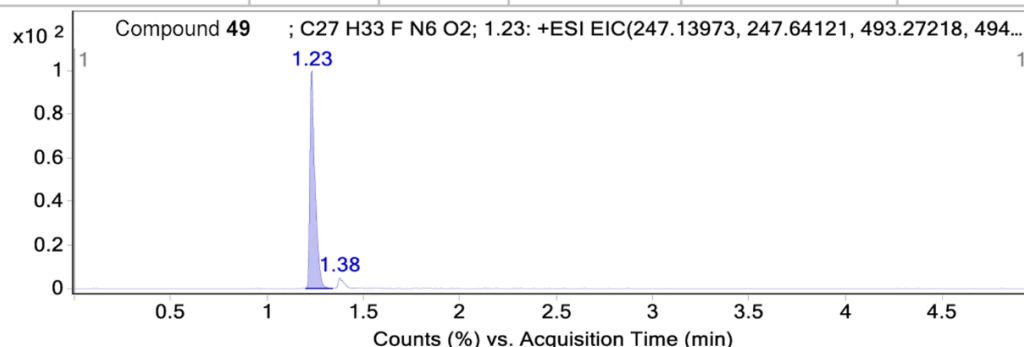

MS Zoomed Spectrum

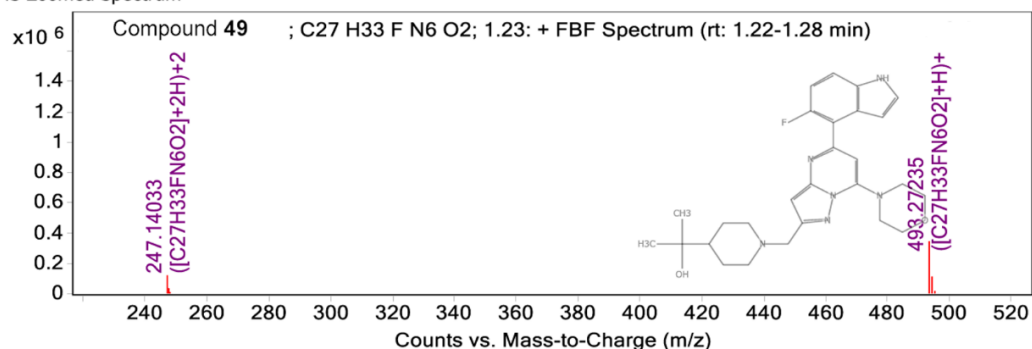

MS Zoomed Spectrum

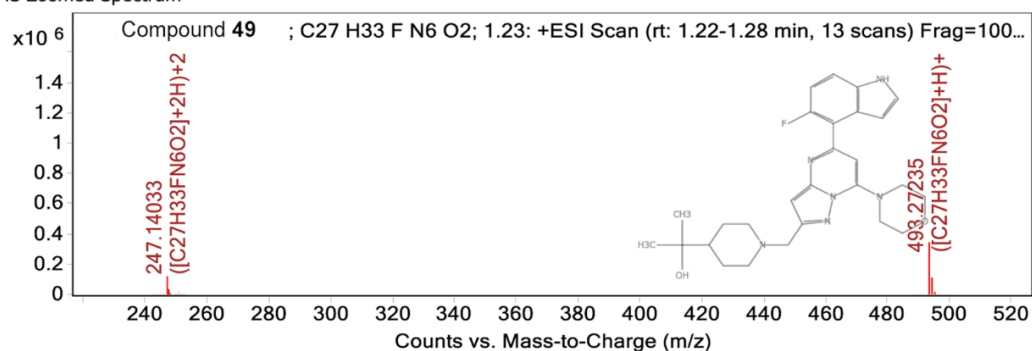

MS Spectrum Peak List

| Obs. m/z  | Charge | Abund     | Formula     | Ion/Isotope | Tgt Mass Error (ppm) |
|-----------|--------|-----------|-------------|-------------|----------------------|
| 247.14033 | 2      | 115650.79 | C27H33FN6O2 | (M+2H)+2    |                      |
| 247.64167 | 2      | 39414.14  | C27H33FN6O2 | (M+2H)+2    |                      |
| 248.14313 | 2      | 6640.41   | C27H33FN6O2 | (M+2H)+2    |                      |
| 248.64393 | 2      | 647.28    | C27H33FN6O2 | (M+2H)+2    |                      |
| 493.27235 | 1      | 340789.47 | C27H33FN6O2 | (M+H)+      |                      |
| 494.27539 | 1      | 101668.37 | C27H33FN6O2 | (M+H)+      |                      |
| 495.27769 | 1      | 16018.31  | C27H33FN6O2 | (M+H)+      |                      |
| 496.28007 | 1      | 2014.64   | C27H33FN6O2 | (M+H)+      |                      |
| 247.14033 | 2      | 115650.79 | C27H33FN6O2 | (M+2H)+2    | 2.45                 |
| 247.64167 | 2      | 39414.14  | C27H33FN6O2 | (M+2H)+2    | 1.86                 |
| 248.14313 | 2      | 6640.41   | C27H33FN6O2 | (M+2H)+2    | 2.09                 |
| 248.64393 | 2      | 647.28    | C27H33FN6O2 | (M+2H)+2    | -0.15                |
| 493.27235 | 1      | 340789.47 | C27H33FN6O2 | (M+H)+      | 0.35                 |
| 494.27539 | 1      | 101668.37 | C27H33FN6O2 | (M+H)+      | 0.51                 |
| 495.27769 | 1      | 16018.31  | C27H33FN6O2 | (M+H)+      | -0.52                |
| 496.28007 | 1      | 2014.64   | C27H33FN6O2 | (M+H)+      | -1.18                |

# Compound 50

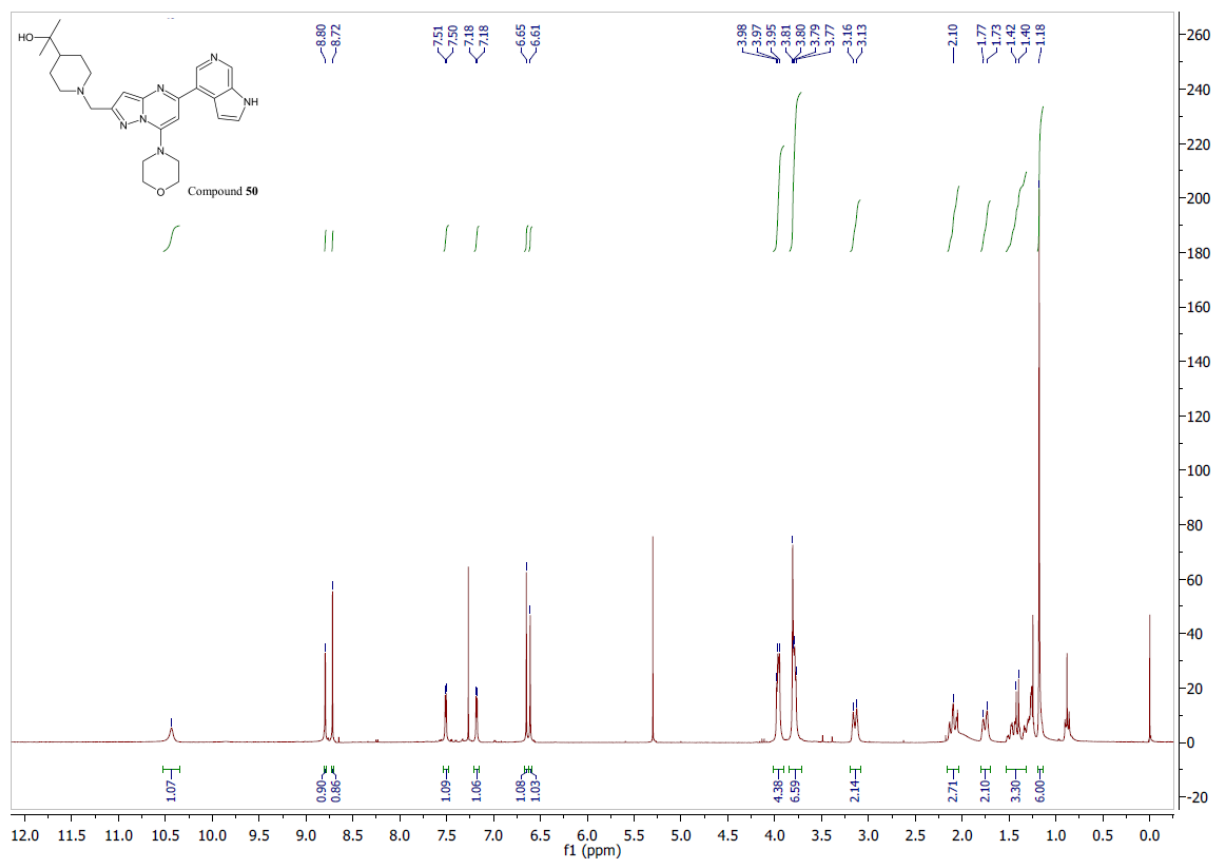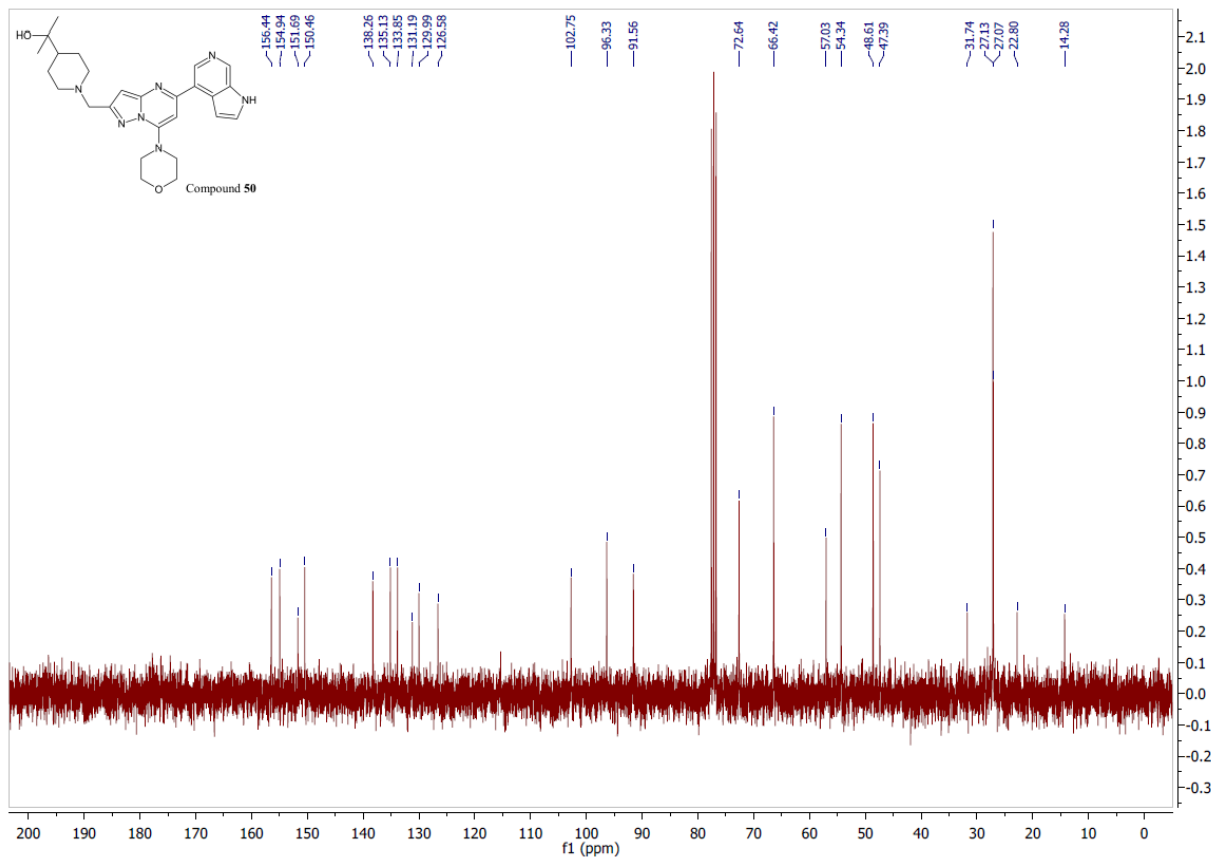

## Compound 50

| Compound Label | Name        | m/z      | RT   | Algorithm       | Mass      |
|----------------|-------------|----------|------|-----------------|-----------|
| Compound 50    | Compound 50 | 476.2775 | 2.29 | Find by Formula | 475.27003 |

MS Zoomed Spectrum

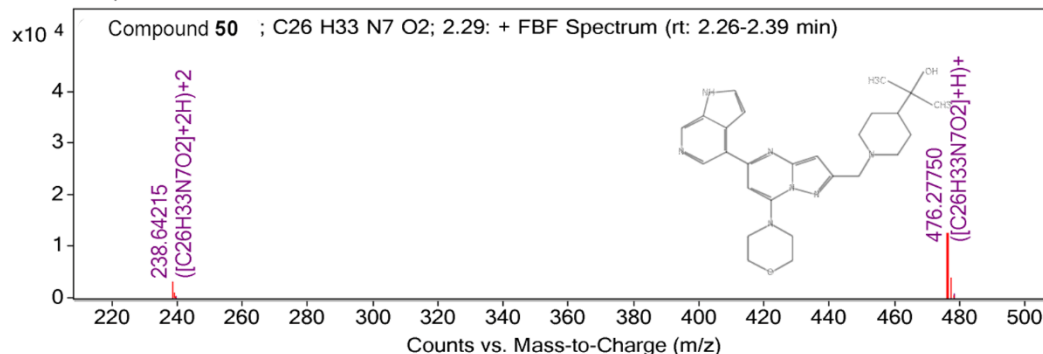

MS Zoomed Spectrum

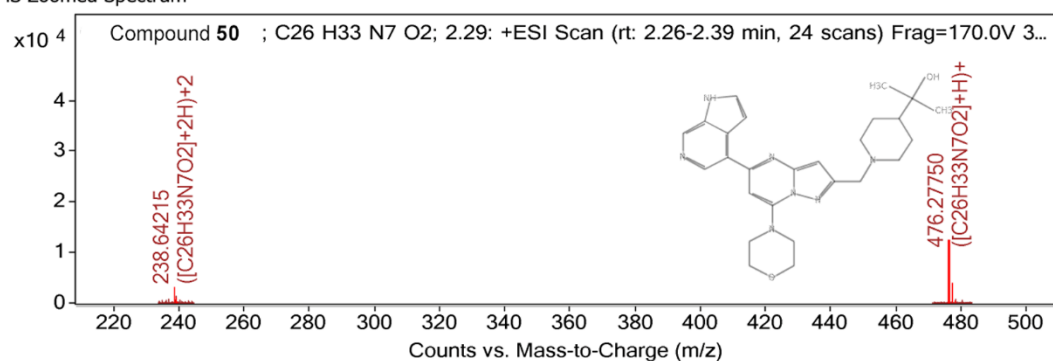

MS Spectrum Peak List

| m/z       | Calc m/z  | Diff(ppm) | z | Abund    | Formula                                                       | Ion      |
|-----------|-----------|-----------|---|----------|---------------------------------------------------------------|----------|
| 238.64215 | 238.64206 | 0.37      | 2 | 3046.57  | C <sub>26</sub> H <sub>33</sub> N <sub>7</sub> O <sub>2</sub> | (M+2H)+2 |
| 239.6443  | 239.64487 | -2.37     | 2 | 280.47   | C <sub>26</sub> H <sub>33</sub> N <sub>7</sub> O <sub>2</sub> | (M+2H)+2 |
| 476.2775  | 476.27685 | 1.37      | 1 | 12351.18 | C <sub>26</sub> H <sub>33</sub> N <sub>7</sub> O <sub>2</sub> | (M+H)+   |
| 477.28005 | 477.27972 | 0.68      | 1 | 3493.83  | C <sub>26</sub> H <sub>33</sub> N <sub>7</sub> O <sub>2</sub> | (M+H)+   |
| 478.28194 | 478.28246 | -1.1      | 1 | 760.19   | C <sub>26</sub> H <sub>33</sub> N <sub>7</sub> O <sub>2</sub> | (M+H)+   |

--- End Of Report ---

# Compound 51

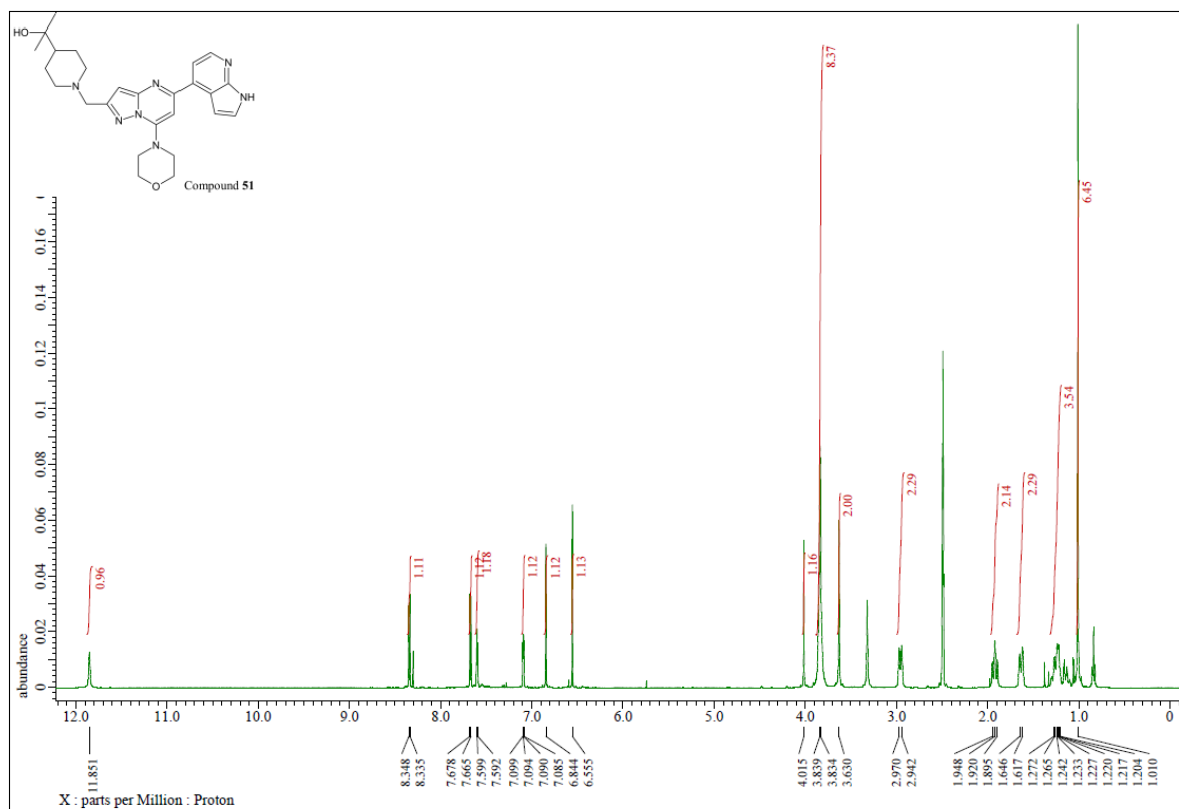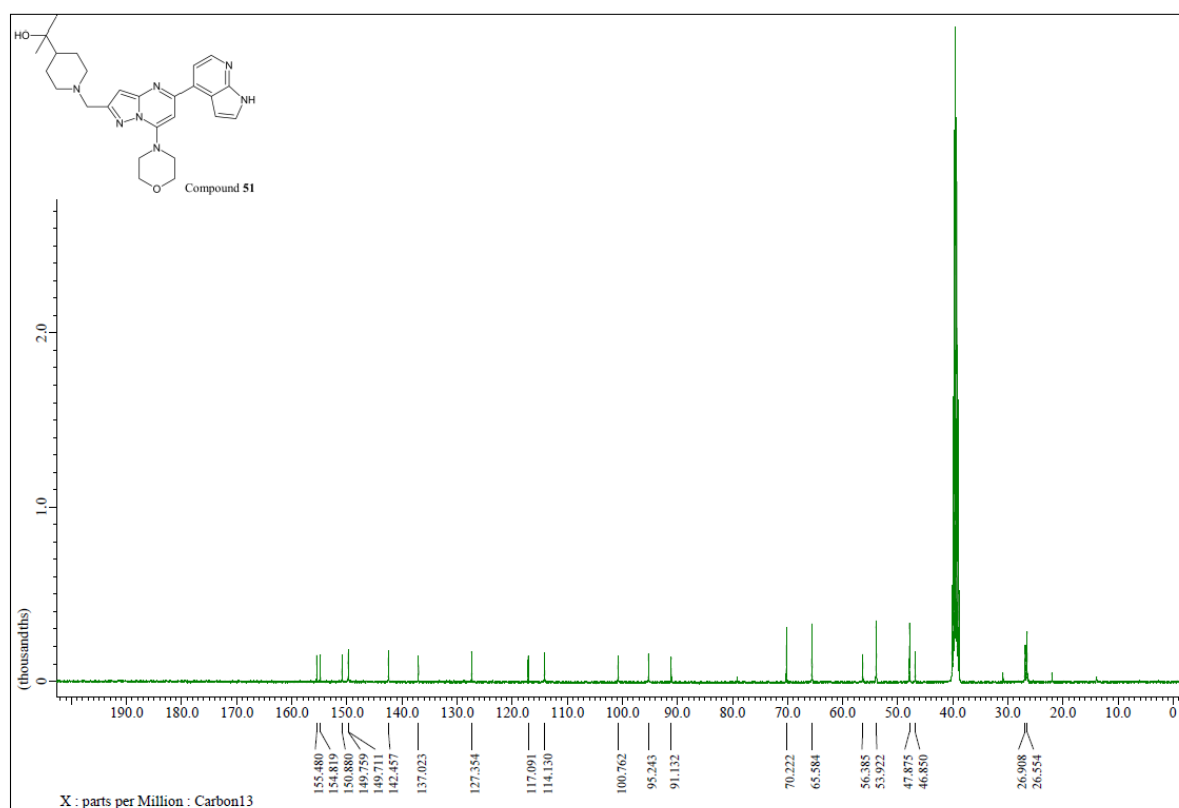

# Compound 51

| Name        | Obs. m/z  | Obs. RT | Obs. Mass | Tgt Formula   | Tgt Mass  | Tgt Mass Error | Find Cpd<br>Algorith |
|-------------|-----------|---------|-----------|---------------|-----------|----------------|----------------------|
| Compound 51 | 476.27758 | 0.99    | 475.27041 | C26 H33 N7 O2 | 475.26957 | 1.76           | Find by Formula      |

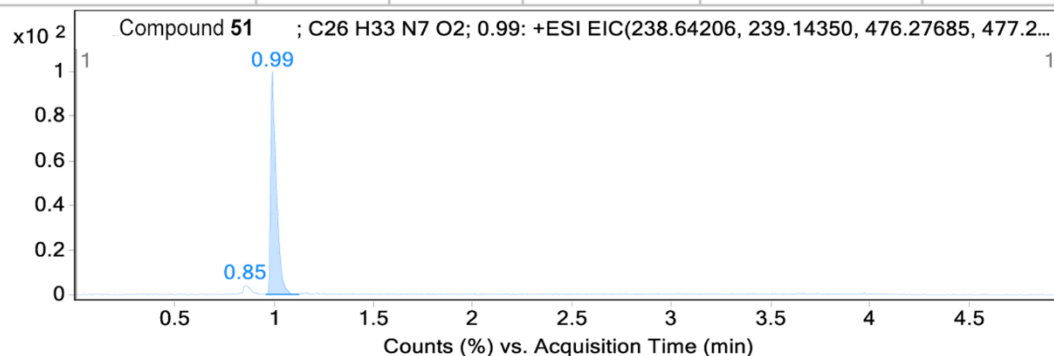

MS Zoomed Spectrum

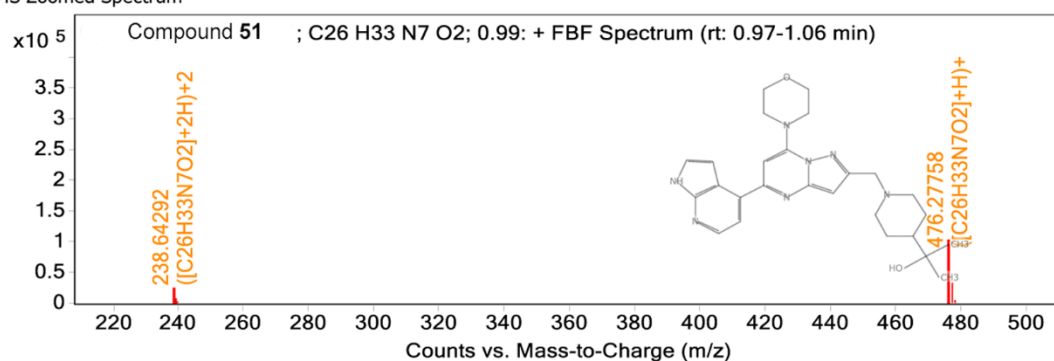

MS Zoomed Spectrum

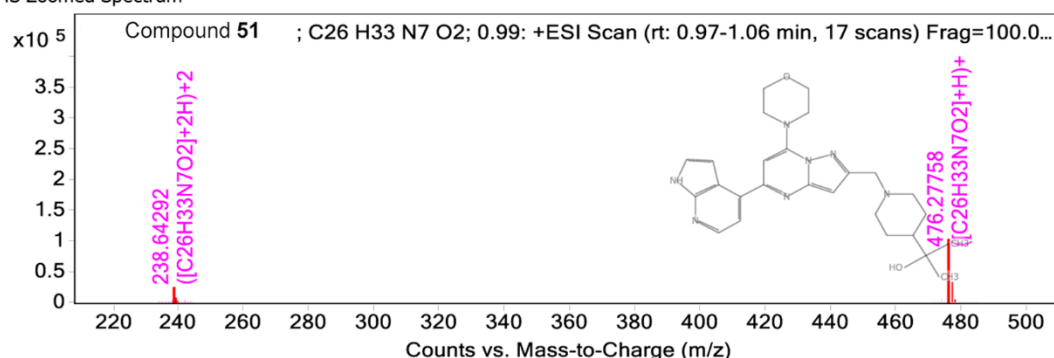

MS Spectrum Peak List

| Obs. m/z  | Charge | Abund     | Formula    | Ion/Isotope | Tgt Mass Error (ppm) |
|-----------|--------|-----------|------------|-------------|----------------------|
| 238.64292 | 2      | 23357.19  | C26H33N7O2 | (M+2H)+2    |                      |
| 239.14466 | 2      | 7984.02   | C26H33N7O2 | (M+2H)+2    |                      |
| 239.64525 | 2      | 1242.2    | C26H33N7O2 | (M+2H)+2    |                      |
| 476.27758 | 1      | 101934.38 | C26H33N7O2 | (M+H)+      |                      |
| 477.28003 | 1      | 32395.08  | C26H33N7O2 | (M+H)+      |                      |
| 478.28266 | 1      | 4780.62   | C26H33N7O2 | (M+H)+      |                      |
| 479.28502 | 1      | 601.29    | C26H33N7O2 | (M+H)+      |                      |
| 480.28589 | 1      | 75.69     | C26H33N7O2 | (M+H)+      |                      |
| 238.64292 | 2      | 23357.19  | C26H33N7O2 | (M+2H)+2    | 3.58                 |
| 239.14466 | 2      | 7984.02   | C26H33N7O2 | (M+2H)+2    | 4.84                 |
| 239.64525 | 2      | 1242.2    | C26H33N7O2 | (M+2H)+2    | 1.57                 |
| 476.27758 | 1      | 101934.38 | C26H33N7O2 | (M+H)+      | 1.53                 |
| 477.28003 | 1      | 32395.08  | C26H33N7O2 | (M+H)+      | 0.63                 |
| 478.28266 | 1      | 4780.62   | C26H33N7O2 | (M+H)+      | 0.43                 |
| 479.28502 | 1      | 601.29    | C26H33N7O2 | (M+H)+      | -0.17                |
| 480.28589 | 1      | 75.69     | C26H33N7O2 | (M+H)+      | -3.74                |

--- End Of Report ---

# Compound 53

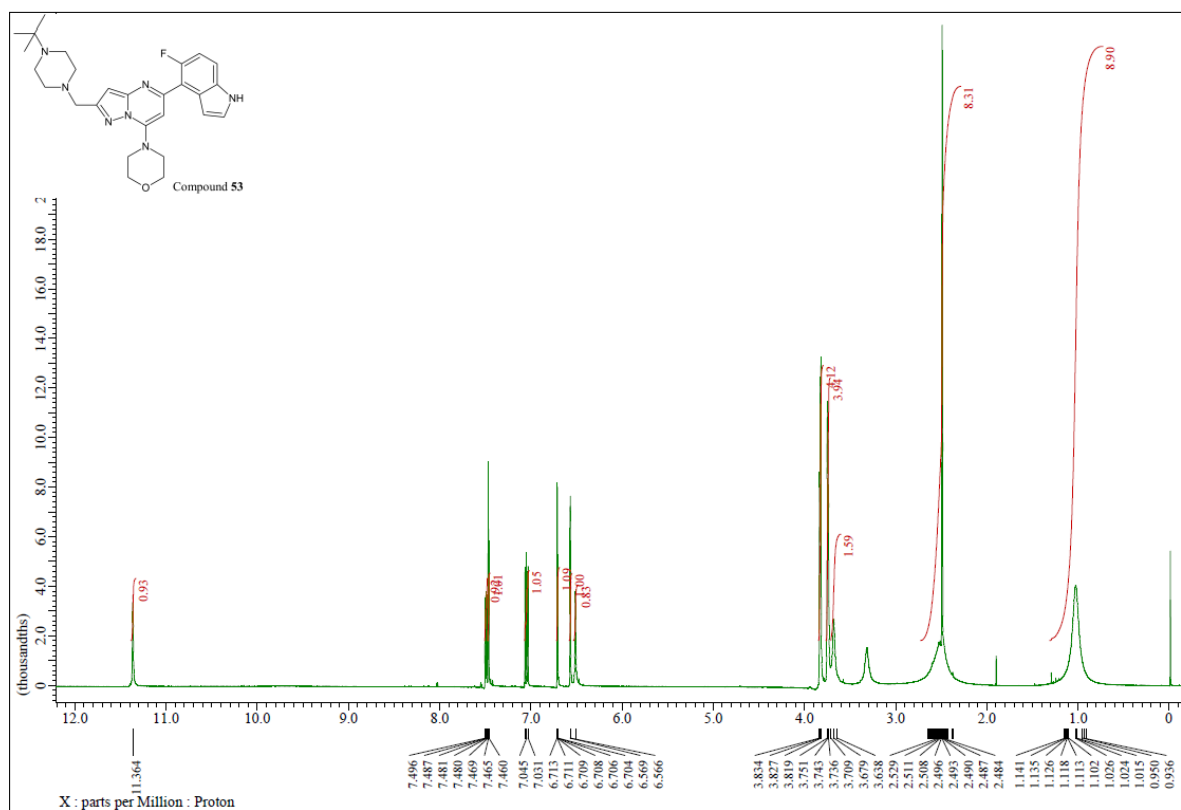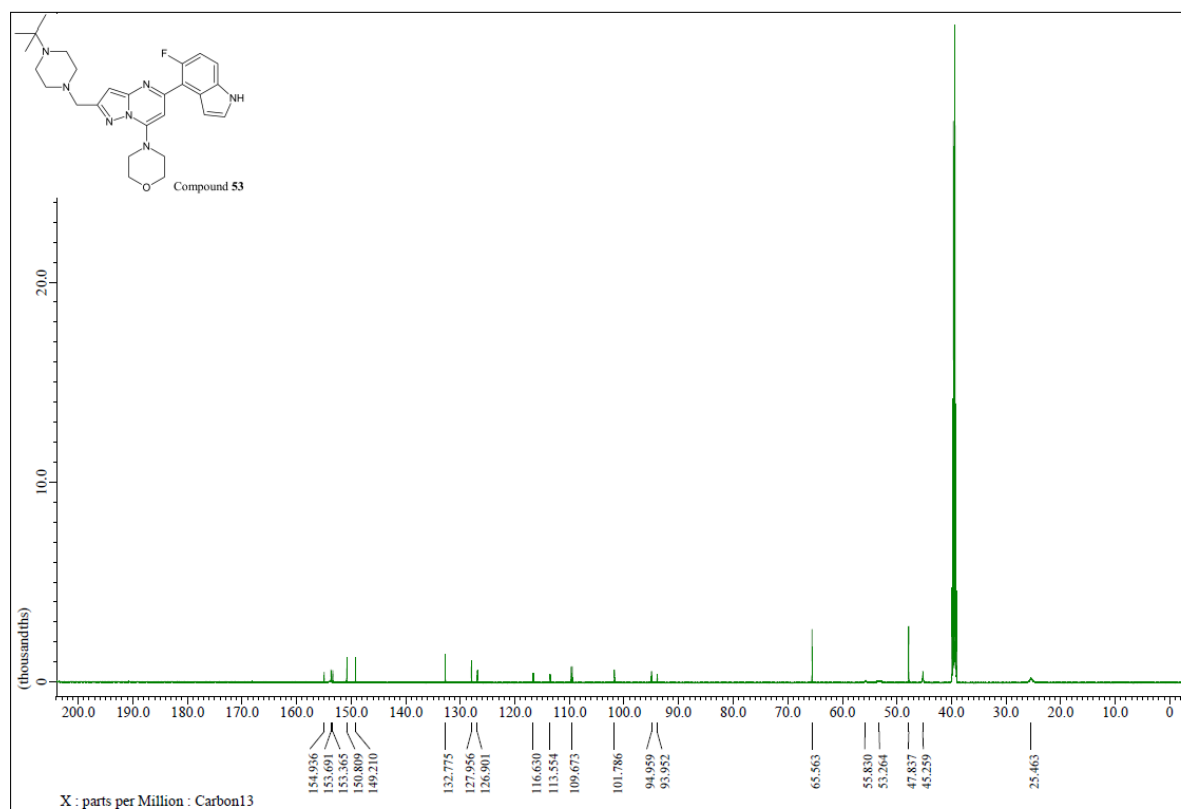

## Compound 53

| Name        | Obs. m/z  | Obs. RT | Obs. Mass | Tgt Formula   | Tgt Mass  | Tgt Mass Error | Find Cpd<br>Algorith |
|-------------|-----------|---------|-----------|---------------|-----------|----------------|----------------------|
| Compound 51 | 476.27758 | 0.99    | 475.27041 | C26 H33 N7 O2 | 475.26957 | 1.76           | Find by Formula      |



MS Zoomed Spectrum

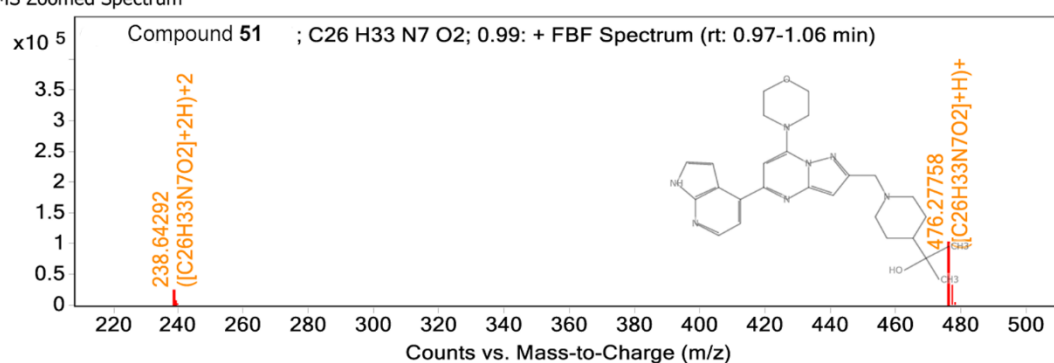

MS Zoomed Spectrum



MS Spectrum Peak List

| Obs. m/z  | Charge | Abund     | Formula    | Ion/Isotope | Tgt Mass Error (ppm) |
|-----------|--------|-----------|------------|-------------|----------------------|
| 238.64292 | 2      | 23357.19  | C26H33N7O2 | (M+2H)+2    |                      |
| 239.14466 | 2      | 7984.02   | C26H33N7O2 | (M+2H)+2    |                      |
| 239.64525 | 2      | 1242.2    | C26H33N7O2 | (M+2H)+2    |                      |
| 476.27758 | 1      | 101934.38 | C26H33N7O2 | (M+H)+      |                      |
| 477.28003 | 1      | 32395.08  | C26H33N7O2 | (M+H)+      |                      |
| 478.28266 | 1      | 4780.62   | C26H33N7O2 | (M+H)+      |                      |
| 479.28502 | 1      | 601.29    | C26H33N7O2 | (M+H)+      |                      |
| 480.28589 | 1      | 75.69     | C26H33N7O2 | (M+H)+      |                      |
| 238.64292 | 2      | 23357.19  | C26H33N7O2 | (M+2H)+2    | 3.58                 |
| 239.14466 | 2      | 7984.02   | C26H33N7O2 | (M+2H)+2    | 4.84                 |
| 239.64525 | 2      | 1242.2    | C26H33N7O2 | (M+2H)+2    | 1.57                 |
| 476.27758 | 1      | 101934.38 | C26H33N7O2 | (M+H)+      | 1.53                 |
| 477.28003 | 1      | 32395.08  | C26H33N7O2 | (M+H)+      | 0.63                 |
| 478.28266 | 1      | 4780.62   | C26H33N7O2 | (M+H)+      | 0.43                 |
| 479.28502 | 1      | 601.29    | C26H33N7O2 | (M+H)+      | -0.17                |
| 480.28589 | 1      | 75.69     | C26H33N7O2 | (M+H)+      | -3.74                |

--- End Of Report ---

# Compound 54

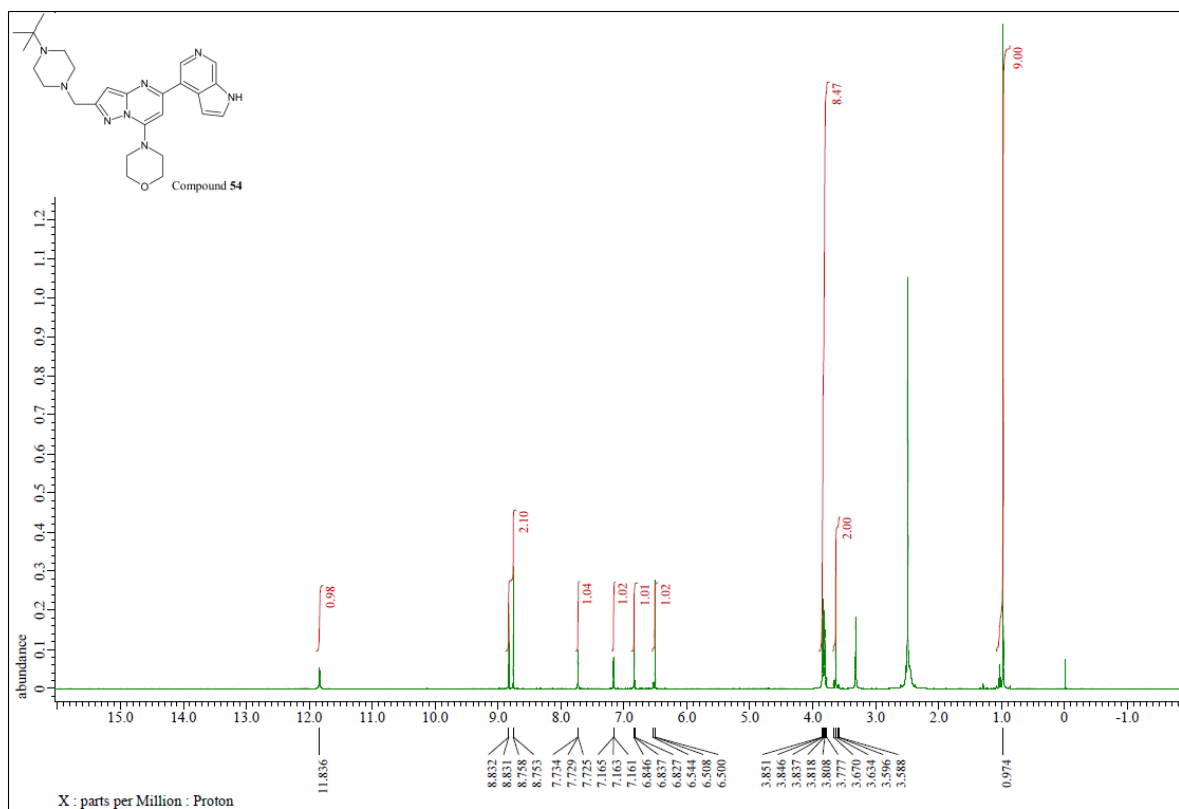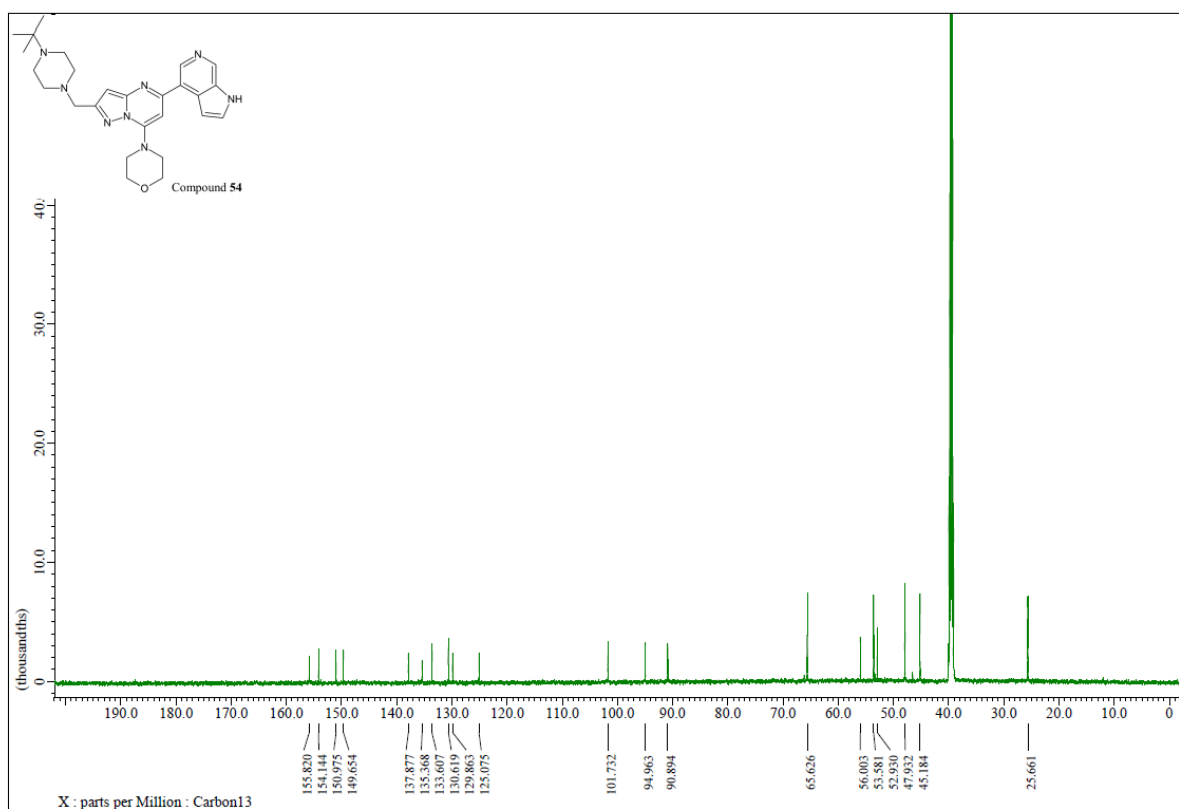



## Compound 54

| Name        | Obs. m/z  | Obs. RT | Obs. Mass | Tgt Formula  | Tgt Mass  | Tgt Mass Error | Find Cpds Alaoirith |
|-------------|-----------|---------|-----------|--------------|-----------|----------------|---------------------|
| Compound 54 | 475.29294 | 0.85    | 474.28648 | C26 H34 N8 O | 474.28556 | 1.94           | Find by Formula     |

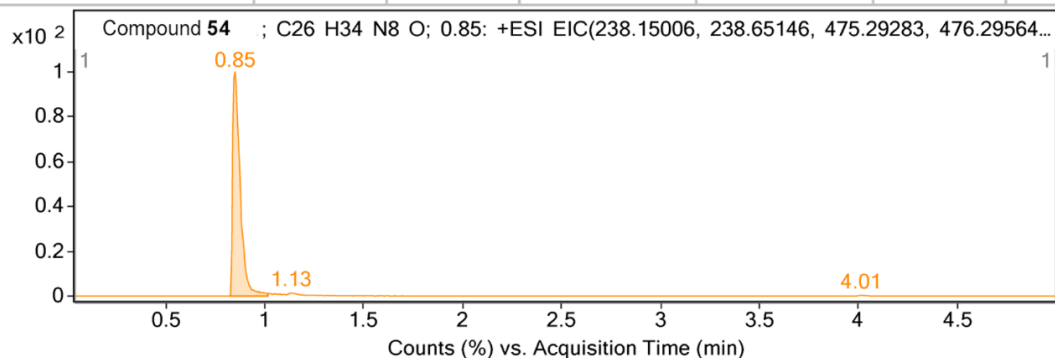

MS Zoomed Spectrum

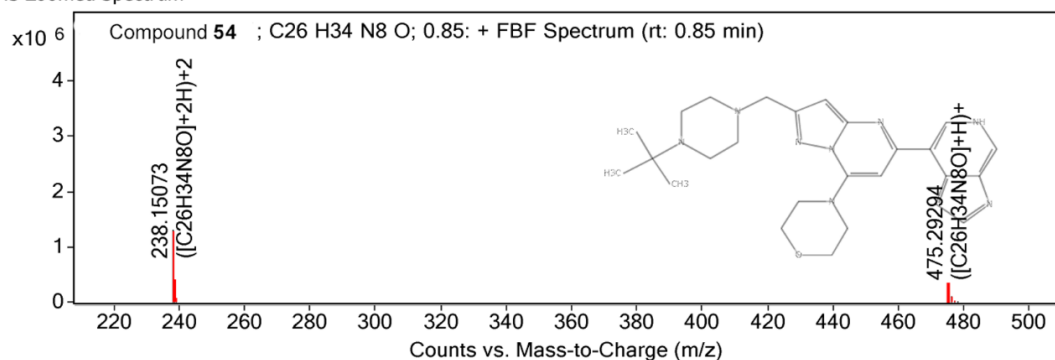

MS Zoomed Spectrum

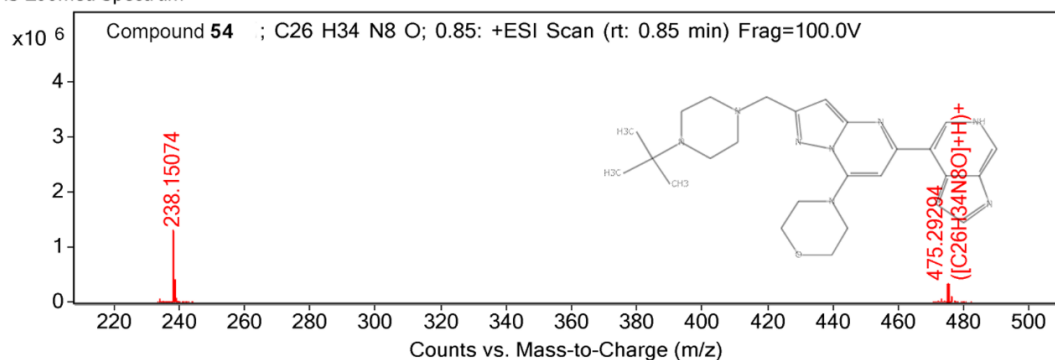

MS Spectrum Peak List

| Obs. m/z  | Charge | Abund      | Formula   | Ion/Isotope | Tgt Mass Error (ppm) |
|-----------|--------|------------|-----------|-------------|----------------------|
| 238.15073 | 2      | 1295540.25 | C26H34N8O | (M+2H)+2    |                      |
| 238.65175 | 2      | 375450.88  | C26H34N8O | (M+2H)+2    |                      |
| 239.15293 | 2      | 55981.86   | C26H34N8O | (M+2H)+2    |                      |
| 475.29294 | 1      | 328461.72  | C26H34N8O | (M+H)+      |                      |
| 476.29541 | 1      | 96053.09   | C26H34N8O | (M+H)+      |                      |
| 477.29793 | 1      | 13882.22   | C26H34N8O | (M+H)+      |                      |
| 478.29997 | 1      | 1075.67    | C26H34N8O | (M+H)+      |                      |
| 238.15073 | 2      | 1295540.25 | C26H34N8O | (M+2H)+2    | 2.85                 |
| 238.15074 |        | 1302772.38 |           |             |                      |
| 238.65175 | 2      | 375450.88  | C26H34N8O | (M+2H)+2    | 1.22                 |
| 239.15293 | 2      | 55981.86   | C26H34N8O | (M+2H)+2    | 0.43                 |
| 475.29294 | 1      | 328461.72  | C26H34N8O | (M+H)+      | 0.22                 |
| 476.29541 | 1      | 96053.09   | C26H34N8O | (M+H)+      | -0.48                |
| 477.29793 | 1      | 13882.22   | C26H34N8O | (M+H)+      | -0.93                |
| 478.29997 | 1      | 1075.67    | C26H34N8O | (M+H)+      | -2.21                |

# Compound 55

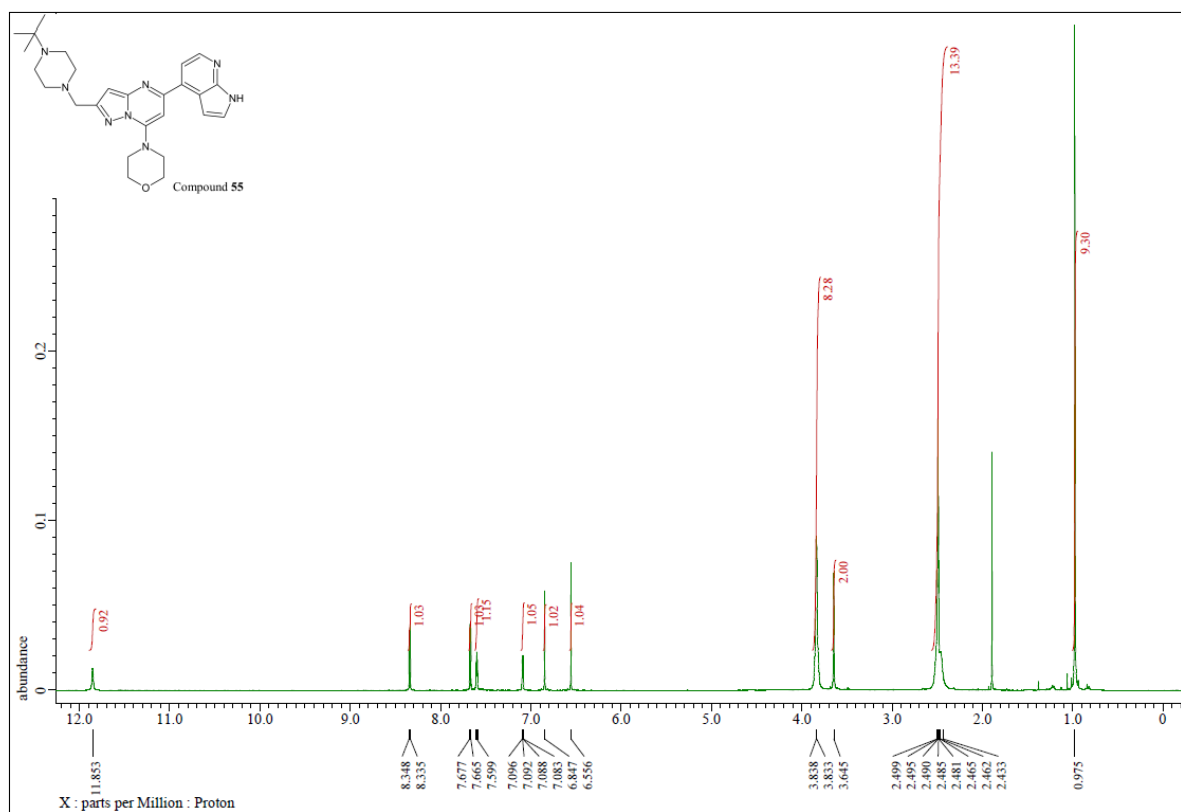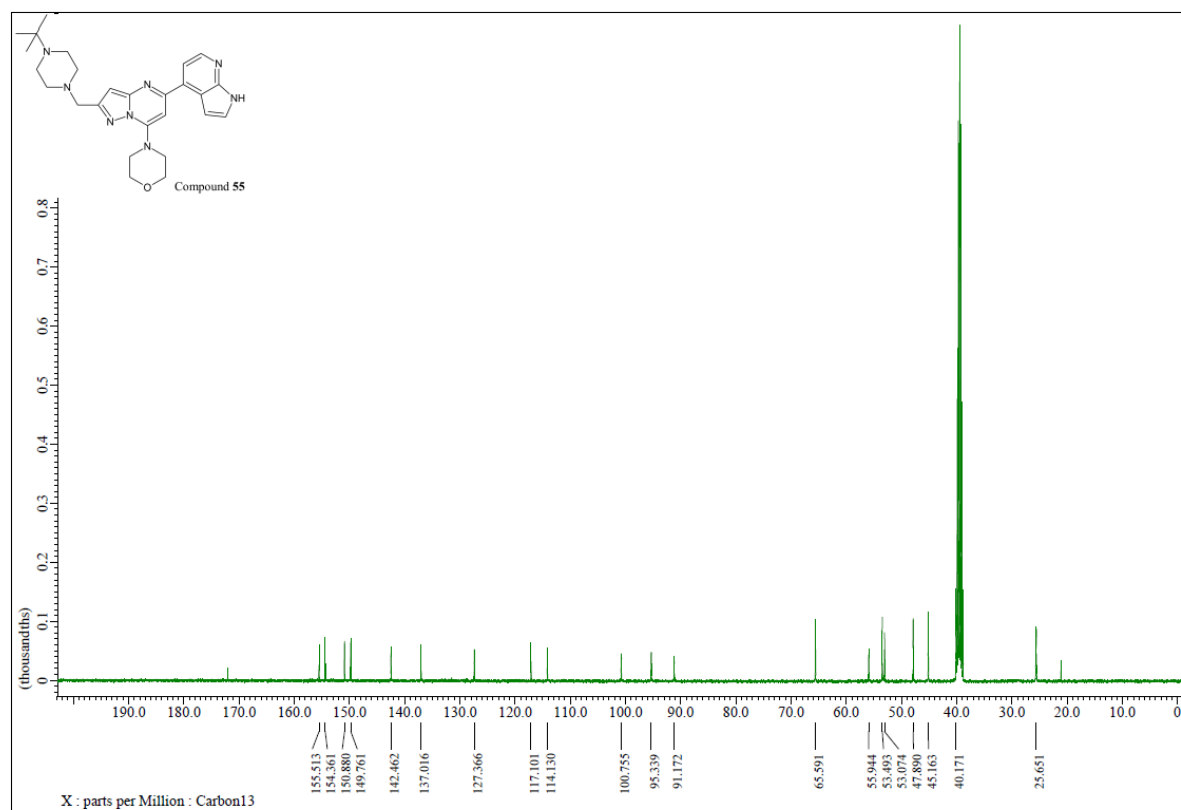

## Compound 55

| Name        | Obs. m/z | Obs. RT | Obs. Mass | Tgt Formula  | Tgt Mass  | Tgt Mass Error | Find Cpds Algorith |
|-------------|----------|---------|-----------|--------------|-----------|----------------|--------------------|
| Compound 55 | 475.2936 | 0.97    | 474.28629 | C26 H34 N8 O | 474.28556 | 1.55           | Find by Formula    |

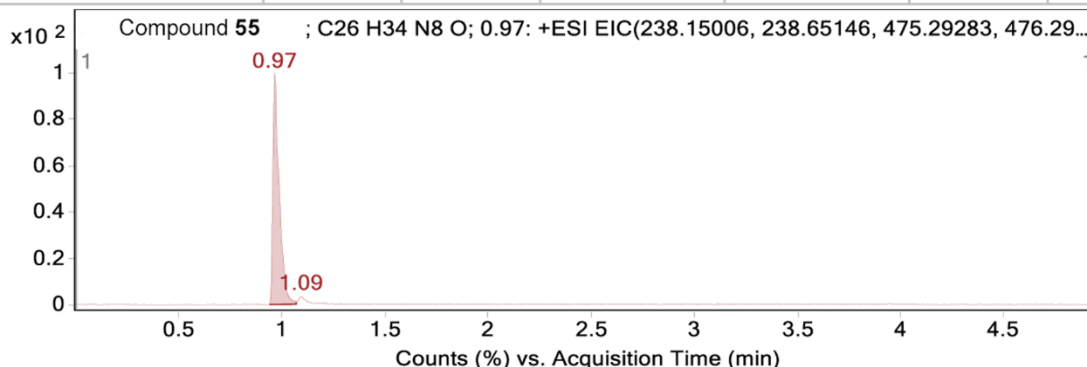

MS Zoomed Spectrum

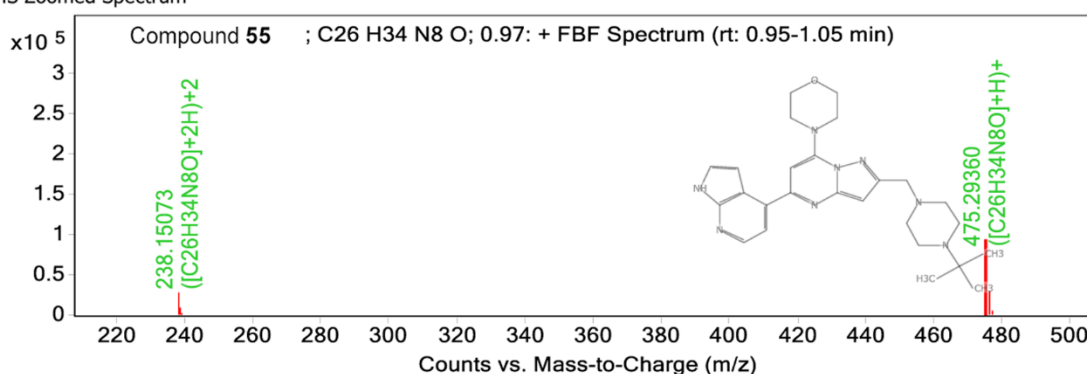

MS Zoomed Spectrum

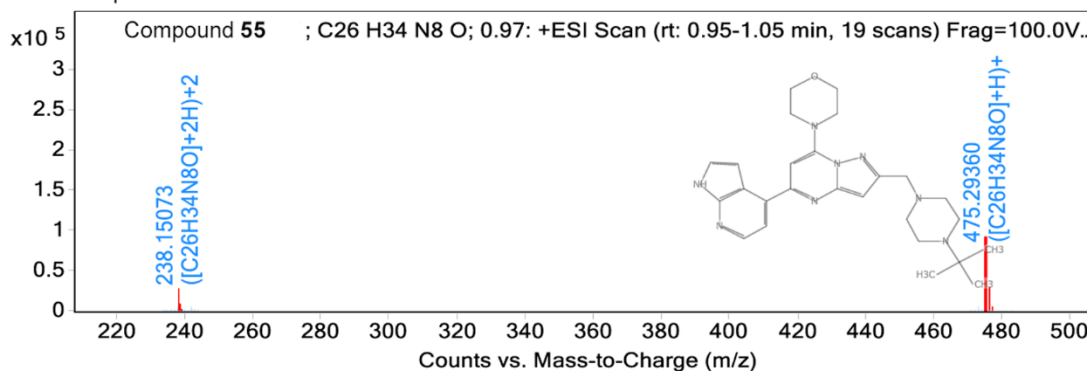

MS Spectrum Peak List

| Obs. m/z  | Charge | Abund    | Formula   | Ion/Isotope | Tgt Mass Error (ppm) |
|-----------|--------|----------|-----------|-------------|----------------------|
| 238.15073 | 2      | 27416.88 | C26H34N8O | (M+2H)+2    |                      |
| 238.65185 | 2      | 8095.95  | C26H34N8O | (M+2H)+2    |                      |
| 239.15226 | 2      | 1933.05  | C26H34N8O | (M+2H)+2    |                      |
| 475.2936  | 1      | 92111.73 | C26H34N8O | (M+H)+      |                      |
| 476.2959  | 1      | 28302.5  | C26H34N8O | (M+H)+      |                      |
| 477.29863 | 1      | 4277.33  | C26H34N8O | (M+H)+      |                      |
| 478.29884 | 1      | 406.24   | C26H34N8O | (M+H)+      |                      |
| 238.15073 | 2      | 27416.88 | C26H34N8O | (M+2H)+2    | 2.83                 |
| 238.65185 | 2      | 8095.95  | C26H34N8O | (M+2H)+2    | 1.65                 |
| 239.15226 | 2      | 1933.05  | C26H34N8O | (M+2H)+2    | -2.38                |
| 475.2936  | 1      | 92111.73 | C26H34N8O | (M+H)+      | 1.61                 |
| 476.2959  | 1      | 28302.5  | C26H34N8O | (M+H)+      | 0.54                 |
| 477.29863 | 1      | 4277.33  | C26H34N8O | (M+H)+      | 0.54                 |
| 478.29884 | 1      | 406.24   | C26H34N8O | (M+H)+      | -4.58                |

--- End Of Report ---
